# Supplementary material for: A synthetic small molecule for rapid induction of multiple pluripotency genes in mouse embryonic fibroblasts
Source: PubMed Central journal article supplement — Sci Rep. 2012 Jul 30;2:544. doi: 10.1038/srep00544 (PMC3408130; doi:10.1038/srep00544), 2012-07-30
Supplement: srep00544-s1.pdf [file srep00544-s1.pdf]

## **SUPPLEMENTARY INFORMATION**

**A synthetic small molecule for rapid induction of multiple pluripotency genes in mouse embryonic fibroblasts**

*Ganesh N. Pandian, Yusuke Nakano, Shinsuke Sato, Hironobu Morinaga, Toshikazu Bando, Hiroki Nagase and Hiroshi Sugiyama\**

### **Cytotoxicity assay**

Colorimetric assays using WST-8 (Dojindo, Kumamoto, Japan) were carried out in 96-well plates with various concentrations of SAHA-PIP  $\delta$  as mentioned before<sup>2</sup>.

### **Microarray Analysis**

Microarray analysis was done by Medical & Biological Laboratories Co., Ltd with microarray chip that is manufactured by agilent technologies with UniGene number of genes. GeneSymbol, GeneName and sequences that were used as probes were given in supplementary table S1 and S2. For comparative method, 2-color method was chosen. In 2-color method, one sample is labeled with Cy3 and another is labeled with Cy5. By comparing fluorescence intensity of Cy3 and Cy5, expression levels were analyzed. Ratio of gene expression of DMSO over either SAHA or  $\delta$  treated MEFs were calculated using fold change to derive the regulation. The obtained raw data was the normalized to attain induction values of either SAHA or  $\delta$  treated MEF over DMSO.

### **Cell culture**

C57BL/6 mouse embryonic fibroblasts (MEFs) purchased from the American Type Culture Collection (ATCC) were used in all experiments. MEF cells were periodically cultured and maintained in Dulbecco's modified Eagle's medium (DMEM) that contains 15% heat-inactivated fetal bovine serum (FBS), 100 IU/ml penicillin, and 100  $\mu$ g/ml

streptomycin at 37 °C in a humidified atmosphere of 5% CO<sub>2</sub> in 95% air. MEFs were passaged by trypsin (Invitrogen). mES cell line R1 (a gift from Professor N. Nakatsuji, Kyoto University) were maintained on Mitomycin C-treated MEFs in complete mESC culture medium (Millipore) consisting of DMEM/F12 (80%), knockout serum replacement (10%), fetal bovine serum (10%), L-glutamine (1 mM), nonessential amino acids (1%), β-mercaptoethanol (0.1 mM) and Leukemia inhibitory factor (1000 U/mL). The medium was changed every day.

#### **Treatment of SAHA-PIPs against MEF**

MEF cells with in the passage P6 were trypsinized for 5 min at 37 °C, and were resuspended in the fresh DMEM medium to a concentration of  $2 \times 10^5$  cells/ml in a 35 mm plate and were grown for 24 h as mentioned before<sup>1, 3</sup>. The medium was then removed and replaced with 2 ml of fresh DMEM medium followed by the addition of 2 μl of the 100 μM of each individual SAHA-PIP **Q-Φ** shown in Figure 1 to achieve a final polyamide concentration of 100 nM in 0.1% DMSO and then were incubated in a 5% CO<sub>2</sub> atmosphere at 37 °C for 24 h. 0.1% DMSO treated cells were used as the control. Incubation time and the concentration of the PI polyamide SAHA conjugates were standardized based on the initial optimization experiments with varied incubation time and the treatment of MEF with various concentration of SAHA-PIPs as mentioned

before<sup>1,3</sup> to optimize 100 nM as the optimal concentration and 24 h as the optimal time for incubation.

### **Quantification of expression of marker genes in mouse embryonic fibroblasts treated with SAHA-PIP**

As mentioned in the previous report<sup>1</sup>, total RNA was extracted from PI polyamide SAHA conjugates treated MEF using an RNeasy Mini Kit, in accordance with the manufacturer's instructions. The amount of nucleic acid in the total RNA was determined by measuring the absorbance at 260 nm using a NanoDrop spectrophotometer, ND-1000 (Thermo Scientific, USA) as mentioned before<sup>1</sup>. cDNA was synthesized from 500 ng of total RNA using a ReverTra Ace qPCR RT kit (Toyobo, Japan) and used as a template for polymerase chain reaction (PCR). SYBR green real-time RT-PCR amplifications were carried out in triplicate with THUNDERBIRD SYBR qPCR Mix (TOYOBO, Japan) and the program as mentioned before<sup>1</sup>. Melting curve analysis of amplification products and the comparative cycle threshold (CT) method used to analyze the expression level of each gene was as carried out as mentioned before<sup>1</sup>. The average CT of the three determinations was used in calculations of relative expression level using DMSO treated cells as the internal control. The relative expression of genes was normalized against GAPDH. Primer pairs

of iPSC factors and actin that were used for RT-PCR analysis is as shown<sup>4</sup>. Other primer pairs used to analyze endogenous gene expression were listed in Table S4.

### **Chromatin immunoprecipitation (ChIP) analysis of promoter region of pluripotency genes**

Antibodies for acetylated histone H3 and normal rabbit IgG were purchased from Upstate Biotechnology Inc., USA and H3K14 was purchased from Abcam (ab10812, UK). ES cells were used as the positive control. After 24 h treatment of each of the cells individually with 100 nM of ***δ***, ***δ-OMe***, ***B***, SAHA and 0.1 % DMSO, ChIP assay was performed according to the protocol described in<sup>5</sup> and that in the kit manual (SimpleChIP™ Enzymatic Chromatin IP Kit, Cell Signaling Technology, USA). DNA fraction was then purified QIAquick PCR Purification Kit (Qiagen, USA) and analyzed with qRT-PCR as mentioned before. Input sample was used as the internal control and the GAPDH was used as the internal control primer pair. Details of the purchased primer pairs used for *Oct-3/4*, *Nanog*, *Rex1*, *Dppa4*, *Gapdh* and *Cdh1* were shown in Table S5.

Figure S1

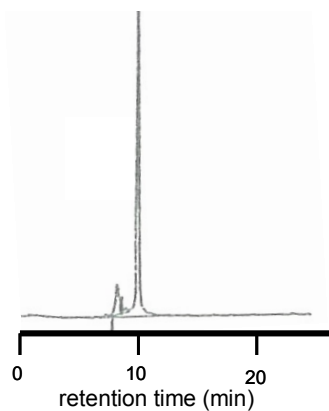

**Retention time: 10.4 min**

Figure S1 **HPLC chromatogram of  $\delta$** . The purities of the  $\delta$  were checked by HPLC (elution with trifluoroacetic acid and a 0-100% acetonitrile linear gradient (0-40 min) at a flow rate of 1.0 mL min<sup>-1</sup> under 254 nm).

Figure S2

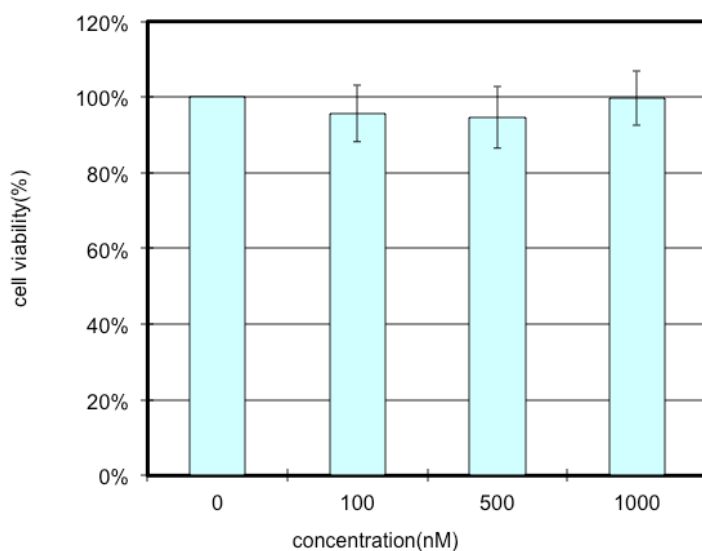

**Figure S2.** Cytotoxicity assay of SAHA-PIP  $\delta$ . Cell viability of MEF was measured after 24 h treatment of the above effectors with various concentrations. Each bar represents mean  $\pm$  SD from 12 wells.

**Table S1****a) Up regulated genes in SAHA treated MEF**

| No | ProbeName     | Gene Symbol  | Sequence                                                          | Fold change<br>[SAHA] vs<br>[DMSO3] |
|----|---------------|--------------|-------------------------------------------------------------------|-------------------------------------|
| 1  | A_55_P2152009 | Tesc         | GTGGTGTGTGGGACTCCGATATTTTTATCTCTAATGGT<br>GACAATAAAGGTTTCCTAATGA  | 23.539                              |
| 2  | A_52_P596595  | Pnma2        | TGACTCCACGTGGCATTATGTTCTGGGAATAGCTTTG<br>CCGTTGACTTACCAACAGAAT    | 21.604                              |
| 3  | A_51_P368313  | Vip          | GGATAAAAGAGATATGTGGCAAAGGATTTTCAGAAT<br>TGATTTCTCCAGTGATAGGTAC    | 15.784                              |
| 4  | A_55_P2004213 | Gprasp2      | TAAACATGTGGTCTCTGCTTGAGTCTGGGTTTTCAAT<br>AAAGTTCGATGTTAAAGTTGCC   | 14.776                              |
| 5  | A_55_P2017600 | Crmp1        | GAGCAGGGCAGTCAGATTTTTAAAGTTTTGTACAGTTT<br>TCCTTTGTATTCACCTCCATTT  | 11.216                              |
| 6  | A_51_P363187  | Cxcl1        | AGAAGTGCAGAGAGATAGAGTTTAGTATTATGTTTTGT<br>ATGTATTAGGGTGAGGACATGT  | 10.696                              |
| 7  | A_55_P2114110 | Cadm4        | AAACACATTTTTGTACGGGGCGGGGAGGGGATAGGG<br>AGGGGGTTTGCAATCCCACTAAC   | 8.946                               |
| 8  | A_55_P2146560 | H2-Ab1       | AATGTATGCTTATCCCCACCTAGATTACAAATAAACGA<br>GACCCAGACTCTGGTTATTTGA  | 8.630                               |
| 9  | A_55_P1997756 | Il6          | CTGTTACCTAGCCAGATGGTTTCTTGAATGTATAAGT<br>TTACCTCAATGAATTGCTAATT   | 8.301                               |
| 10 | A_55_P1965283 | Wdr17        | GTCTAAGAATAATAGGTTGGGAGGTGGTTTGATACTT<br>GGAAGACAGAGGGAATAATATA   | 8.200                               |
| 11 | A_55_P2007500 | Tmem151b     | TCCAAGCGCAAAGATTGTACAAATCACACTGATGGAT<br>AATAAAAGTGTGGATGACTCACT  | 8.194                               |
| 12 | A_52_P562676  | Sult4a1      | AGTACTGTACGGATGTTCTGGAACCCACACATGGTAATC<br>TCTGCTTGCCTGCATCTTTAAT | 7.730                               |
| 13 | A_51_P504354  | Nrarp        | TTTTTTGAATCTTGGTTATGAACCAATTTTAAAGGGC<br>GTTGTATCCAGCGTTGTGAAGG   | 7.370                               |
| 14 | A_55_P1962747 | H2-Ab1       | TAGTAAACCAATGTATGCTTATCCCCACCTAGATTACA<br>AATAAACGAGACTCAGACTCTG  | 7.308                               |
| 15 | A_51_P483159  | Gchfr        | CCGAGGACGAGGACAGTCCCTGGATCCTACACAGCTA<br>ATCCAAGCCAATAAAGGGCTCTC  | 6.717                               |
| 16 | A_55_P1990032 | Cxcl5        | GCTGAGATATTTAGATGCTGTAGTGTGCTTTTTAAAG<br>AGTGTGCTTTGTATAAAGGAGA   | 6.677                               |
| 17 | A_51_P428372  | Ppbp         | CTGGTCATGACCATGTTTTTCCAATTTCTTATCCCTAGA<br>ATGTCTTGTTTCCAAGCAACC  | 6.467                               |
| 18 | A_51_P202050  | Dtx1         | TGAGGATTGGCTGCTGGGATGGAAGTCAGCCAAGCTT<br>TAAAGGGACGCCAGCAATTGCTC  | 6.418                               |
| 19 | A_55_P2119633 | Gnal         | GATTGCAGCCATTAAGTAGTTGATTACTGTGTGATTT<br>CAATACTCAAGAAAGCTTTCAG   | 6.392                               |
| 20 | A_51_P308048  | Cmtm8        | CCAGTGTCTTGTACAATTGAGCTGGATATTTACTTGG<br>GGAGTGTGCGGCTTCTAATGA    | 6.352                               |
| 21 | A_55_P2085311 | Nxph4        | TCCTAACCTTGCTAAAGCAAAGTCTGATCAGGGGG<br>CTCTGCCTGGCCCTGTGCTCTG     | 6.085                               |
| 22 | A_55_P2044684 | Rsph1        | CTCTAGCTGTTAAGTTGTTTTTCGGTTAACAAAATAA<br>ATCTCCAGGTGTTCAAGTGTG    | 6.034                               |
| 23 | A_51_P204740  | Cd34         | CCAGAGATGAGAGGATTGGGTGTATTCTTCTTCTGAATA<br>AACGTGATGAGTGAATGATG   | 5.987                               |
| 24 | A_55_P2032094 |              | ATGTGTGATAATATTGGAACCAACAATTCGGTCATATT<br>TTTAAAAGCTATTTGTGTGTGA  | 5.888                               |
| 25 | A_55_P1980204 | LOC100044518 | TTATAAACTAAACTCACGGTTTGACTTTTGTCTGACTCA<br>GTGGAGGCTGTGGGGAAAAAG  | 5.883                               |
| 26 | A_55_P2047305 | Adcy5        | GCAAGAGGACACCAGGCAAGGAGCAGTGGCTCTGAG<br>CAAAAGAAAATATTTATTAATAA   | 5.861                               |

|    |               |               |                                                                   |       |
|----|---------------|---------------|-------------------------------------------------------------------|-------|
| 27 | A_55_P2362877 | LOC100044518  | ACAGGCTAGGAATGGAGAAAGAAGCGCCTTTGTTTT<br>CAATAAATGGTCAGGGCACTCAT   | 5.852 |
| 28 | A_55_P2081785 | Slc45a1       | AGCCAGCCAGGCTTCTAGTGGGATGTAAATACGGGCT<br>AAATAAACACAGCAGCAATCTT   | 5.723 |
| 29 | A_55_P2137049 | AA467197      | CTGCATTAGCAAGTGAAGGTAGCACATAGTCTAAAT<br>AGTTTTCTGTGTTTATTGGTGTA   | 5.654 |
| 30 | A_51_P176352  | Ndrp2         | TCAGGAGAAGGTTTCTGGTGGGTCAGCGATCCTTAA<br>TGTGATAGAAATATCCAGCATGT   | 5.609 |
| 31 | A_55_P1984243 | Naip2         | TTCTAGTACATTTCACTCTAGACAGGCATGGTGAATC<br>CTAGTACTTAGGAGCCTGAGCA   | 5.560 |
| 32 | A_52_P220573  | Serpini1      | TGGTGTTAATTCAGTGTTACATTCTCTGTAAGAACA<br>GTCTTTATCTGTATCCTTCT      | 5.555 |
| 33 | A_55_P1997831 | Dbndd1        | TTTCATGTGCACAAAGACAAACACACTGGCTGCTCTGA<br>CCACAAATCAAAGACTGTTTTG  | 5.548 |
| 34 | A_55_P2072233 | Zcchc12       | GTGTTGTTCTATATGCTGTATTTTTACCAAACGAT<br>GTTGTGGCCTCTTTGTCAAT       | 5.539 |
| 35 | A_51_P397468  | Rundc3a       | GGACAGCGCTCATTCTGGTGGCTCTGAAGGCTGCC<br>GGTTCCTCTGATTTCTCCACA      | 5.531 |
| 36 | A_55_P2051313 | Gstk1         | ACAAGTGCCTTTGAAAAGCCTTAAATCTGCATTCCC<br>ATAAAATAAAGTTGATGCCACC    | 5.495 |
| 37 | A_55_P1966102 | Nme5          | AAGTTACCTTACTGTAAGAAGCCGCTCCCATGTTCTT<br>ACATTAAGCATATATGTGT      | 5.472 |
| 38 | A_55_P1976200 | Lmtk3         | AGCCTGGCCCTGGAGGGGCTCTGATTCAAACCTC<br>GCGTGACATTTTACATTATT        | 5.409 |
| 39 | A_51_P458778  | Hpgd          | AAGCTCCTTTACAATGGAATATTTAGTAATAAAAGCT<br>TGTCGGGACCTGCAAGCGAAC    | 5.392 |
| 40 | A_66_P135185  | Etv1          | TCACAGGCCAGTAGCATTTTATGTATCTGGTGCCATCC<br>TGCTGTTTTGGTACTACAAATA  | 5.364 |
| 41 | A_52_P533724  | Ino80         | ACTCGGCTCAAGTCTCAAGGACATAGGGTCTTATCTA<br>CTCTCAGATGACCAGAATGATA   | 5.100 |
| 42 | A_66_P125828  | Gm6684        | GTCGCCACCACGGTTCGCATGTGGATGGTAAACCT<br>ACATGTCGCATGTGGATCTGA      | 5.033 |
| 43 | A_66_P116998  | Tro           | CTATTCCCATCAGCTGAGTGAAACACTGAAAAATCTG<br>CTGTTCTGCTTTGTGTTGCT     | 5.021 |
| 44 | A_55_P2006093 |               | TGCAAGTGAACATGGATATCCAGATATGCTTCGAGCC<br>AAGAGGGCATCTGAAATCTACA   | 4.852 |
| 45 | A_52_P49378   | Kif1a         | TGTGTACATAACCACCTGACGTAATGACTAGTATCCTGC<br>TGTTTACACCCGAGTGTAGCT  | 4.829 |
| 46 | A_66_P121288  | Tceal6        | ACCCAACTCCAGTCTCTGTCTTTTAGTACAGGATTT<br>TCACCCATGTGCATGAAAAAT     | 4.777 |
| 47 | A_55_P2169829 | 3632451O06Rik | GGTGCAATTTAGAACTCATAGGATACATGTTCAAGT<br>GGAGATAGGTAGAATAAATATT    | 4.707 |
| 48 | A_55_P2427377 | 3110068a07rik | CTTCATCTTTACAAAGCTTGTAGCTGCCATTGCTTCTCT<br>GCTTTATTAATAAAGATACC   | 4.635 |
| 49 | A_55_P2008987 | Ch25h         | TGCGTGAAGTCCAGAGAGCGATGCGCTGTACACTTGA<br>TCCAGAAGAAGAAACAGACTTGA  | 4.630 |
| 50 | A_55_P2004867 | Serpib2       | CATCATAAGTAAGCATGCTTACTTACACTGCTATCT<br>GTTGTATAAAACTTAGCAATCC    | 4.617 |
| 51 | A_55_P1982902 | Tceal3        | GCTCTGTCTTTTAGTACAGGATTTTACCCATGTGCA<br>TGTACATTGTAATAACAAT       | 4.577 |
| 52 | A_51_P270733  | Syng1         | ATGTGTAATCCCGCAGATCAGCAGTGTCAAGGACCG<br>CAAGAAGGCCGTGCTCTGACA     | 4.564 |
| 53 | A_51_P256246  | Tspan13       | AGTCAAGGGCAAAGGAAGATACCATTTGGGAAATGCT<br>TTGGTGTGTAACATCTTCAAGCTC | 4.510 |
| 54 | A_55_P1953846 | Abca8b        | CACATCCCTTAGGACACTTATAGCCATAGTTCTGTAG<br>AATGTTGAATAAACAGTACTT    | 4.498 |
| 55 | A_55_P2048759 | 4930583H14Rik | CTTTCTTACTTTGTTCTATGTAAGACCAGATTACTGG<br>GTTTGCTGTGAACACTTTAA     | 4.468 |
| 56 | A_55_P2017710 | lgsf9         | CGCGCGCAAGCGCGCTTCGAAAGTGGTGTATTATG<br>GTGTGGGTGCAGGTTCTTTTTT     | 4.444 |
| 57 | A_51_P510418  | Aldh1b1       | AAATCTGATTTCAAGCTGAGTCCAGTGAAGTGTAC<br>AAGAAGTGCAACCAATAAAGT      | 4.415 |



|    |               |               |                                                                   |       |
|----|---------------|---------------|-------------------------------------------------------------------|-------|
| 58 | A_55_P2045642 | Stmn4         | GAGACCTGCCCTGCAGCGGGTGGGATAAGGTCTGTGT<br>GCGTCTGTTTCATTGTCATCTTTT | 4.376 |
| 59 | A_55_P2048119 | Slc29a4       | CCTGTCTACCTGTGTGTTCTCTGACTACCGCACTGGCC<br>ATTAATATGGCAGAGACTGCC   | 4.360 |
| 60 | A_55_P2024463 | Tbkbp1        | CTCGGCCAGCCGATGGCAGTGAACGCCACTGTCCATC<br>GAATGTGCCATTCTGATCCAAAT  | 4.331 |
| 61 | A_55_P1962771 | Cyfp2         | GTACCTGTGTTGAGTCGATAAAACATTTTCATCTCCATT<br>AAAACGTCTCCAAACCAGTT   | 4.327 |
| 62 | A_55_P2042016 | LOC100048058  | ACCTGTGTGTTCTCTGACTACCGCACTGGCCATTAAAT<br>ATGGCAGAGACTGCCACCCT    | 4.284 |
| 63 | A_52_P482897  | Areg          | CTCAGAGGAGTATGATAATGAACCACAAATATCCGGC<br>TATATTATAGATGATTCAGTCAG  | 4.263 |
| 64 | A_55_P2123502 | Jam2          | TTCGTGATTTCTGTATGTGGCCTTGGCACATGCTATGC<br>TCAGAGGAAAGGCTACTTTTCA  | 4.232 |
| 65 | A_51_P182257  | 1700019N12Rik | CGGTCCTCGAACCAAGCTCAACCTCATCTGCATGGA<br>ATTTGAATCCTAGAGAAATTA     | 4.210 |
| 66 | A_51_P459108  | Insl6         | CAAACATCACTGGTGATAGAGATGTACAACTGTCGT<br>AGGAACTATGCTCGCTTAATAAA   | 4.058 |
| 67 | A_55_P2092296 | Fbxo2         | GGATCCCGCTCTTAGCATTGTGCCTGCCTCAAAGTG<br>GGCACTCAATAAATATTTGTC     | 4.035 |
| 68 | A_66_P119034  | Pla2g7        | TTACCCAAATAAGCATTTTTTAAATATACACTGTACTGT<br>AGGATAGTGATGAACCCCTAG  | 3.963 |
| 69 | A_55_P2208579 | Onecut2       | TCCAGCACTGTACCAAGCATGATGCAAGGACTCTCC<br>ACCTGGGCACAAGTCATCTCCA    | 3.956 |
| 70 | A_52_P63855   | S100a7a       | GTTCAAGTAAAGAAGTTTAGTTTTTATTATCAGGAACA<br>TCGTTTTGGGCAGAAGACATGG  | 3.947 |
| 71 | A_51_P399175  | Ppm1j         | GCAGTATGAGCACTGTCCAGATGATGTGCTGGTCTCG<br>GGAACAGATGGCTGTGGGATGT   | 3.929 |
| 72 | A_51_P389988  | Slc40a1       | TTCTAGAGCAACAATAGTCACAAAAGTTCCCTTTCAA<br>TATCCCTGAGAAGAATAAAGAA   | 3.917 |
| 73 | A_51_P469968  | H2-M3         | CCTTCTCGATAAAAGCTGTACTTCATGCTGTTAAAAGT<br>GTAAGATTTGTACATTGGAAAG  | 3.907 |
| 74 | A_51_P201785  | Morn5         | TGCTGGCCTGGGAACTGGCTGTAGTCTAGCTTCGA<br>CTTAAGTTTCAGAATAAAGGTTT    | 3.893 |
| 75 | A_52_P60353   | Greb1l        | GACTCTAAGCTGTCTTAACTTATGTCTACAGTATGTTCT<br>TGTTCTTTTCATTTGGTGAATG | 3.853 |
| 76 | A_52_P476029  | 8430427H17Rik | GTCATAAGTATGTGGAATCCTTTTCTTTTGGACTGT<br>ATATCATATACCAGACTGAATC    | 3.843 |
| 77 | A_55_P2106901 | Nkain4        | CGGGGGACACTGCAGGACAGGGTGGCTACAACCTGTG<br>AGTTTGTAATATCTTTCTTTTTT  | 3.841 |
| 78 | A_55_P1953301 | Sord          | ATCATGGCCAGACCTGAGCTTCTCAAACCTGCTTCGC<br>ATAATAAAGTGTGATGGTGTCT   | 3.840 |
| 79 | A_55_P2109257 | Nipal3        | CATGTGTTATTTTGCAGAAGTGTGATACTGTGTGCAG<br>ATAACATTGTAAGCGGTATTT    | 3.800 |
| 80 | A_55_P2008889 | Tmsb15b2      | AGATCCATTTACTACCTGGCTGCAAAGGTCAGCATTT<br>GCTATGAATCATTAAATTTTTT   | 3.733 |
| 81 | A_55_P1977533 | Eno3          | CTTTCACAGGAAAGACACAGGCCTCAAGCCCTTCTCC<br>CAGAAATAAAGACTGCCAAACC   | 3.729 |
| 82 | A_55_P2169669 | Csf1          | CAGCTGCATCATATATTGTCATATGTTGAGCTGTAGT<br>CTATTAACAAACCCAGTTCTAT   | 3.712 |
| 83 | A_55_P2070199 | Speer2        | TGTGAATAGGAGGAAGCCAGTGTGATCTGATTCAG<br>GGTGTGTTCCCTTTCATGTTCT     | 3.706 |
| 84 | A_52_P282838  | Spin2         | CATTGTCTGTGTAAGAGATGAGTATGTTGGTGAATG<br>GGATATGAAGAAACAGCTGTCA    | 3.697 |
| 85 | A_52_P590396  | Sort1         | GTGTTAACTTTGACTGGTAATTTTCTGTATATTTGCA<br>ATATTTGGGTTAGAAATAAAC    | 3.650 |
| 86 | A_55_P2263877 | 8430436N08Rik | CTTTTCATTTCAAGCTGACTGTATTACTAGAATGAAAT<br>AAAAGTGCTGTACTGGTCTGG   | 3.635 |
| 87 | A_55_P2143219 | Rasgrp2       | TCTGTTAGACCAAGAAGGGAACCGCAGGCACAGCAGC<br>CTCATCGACATCGAGAGTGTGTG  | 3.609 |
| 88 | A_51_P230347  | Sfrs13b       | ATCTCATTACTAAAACACACTGTGAGTCCCTACAGCTA<br>ATATTTATGCTGGAATACCTA   | 3.608 |

|     |               |               |                                                                   |       |
|-----|---------------|---------------|-------------------------------------------------------------------|-------|
| 89  | A_55_P2149500 | Kifc2         | CTATCTAGCAGAGACAACCCTTCTGGAGTAACCTAAT<br>TAAAGCTGTGGGTTTTTCAGCAA  | 3.582 |
| 90  | A_55_P2044582 | Iglon5        | GCCGTGTGTTCCAATTCATGGGGAGTGTGAGACCAC<br>CACACCAATAAACGCCTTTTTCC   | 3.545 |
| 91  | A_55_P2148688 |               | CTGTGTGCAGATAACATTGTAAAGCGGTATTTAATTA<br>AAATCCAAGCAGTCTTGCAGA    | 3.538 |
| 92  | A_55_P2146214 | Zcchc18       | CTGTGTGCCTCGGTATATATGTATTGATAAAAGTGATC<br>ACATATAAGTGCTGTTCTATAG  | 3.532 |
| 93  | A_66_P119017  | Smarca1       | TTTACTTGTCCCATCTTCAAATGCTAATTACTACTTCC<br>AGTGTATTCATGGTACTCTAA   | 3.517 |
| 94  | A_51_P234881  | Elovl4        | TTTTTACACAGATTAATTTGTTATGGGCGTCACAGAGA<br>GATCATATGGAAAGAGGAAATG  | 3.505 |
| 95  | A_55_P2090070 | Myh14         | TCTGTGTGCTCATAGGGTAATGCTCATGGCCCTCATG<br>CTCCAGACACTAAAGAAATAAA   | 3.466 |
| 96  | A_52_P645862  | Agtr1a        | TCCTCCACATATATGTACATATGTATCTCTAAGCTGTCA<br>TTTGATGAAGTTTTGGCAATG  | 3.465 |
| 97  | A_55_P2047275 | Tspan7        | CTCTGTCTAGCATGCCAACAAGATGCATTGATATTGT<br>GAACATTTGTGATACATGTATT   | 3.405 |
| 98  | A_55_P2017914 | Csf1          | CGTGCGATTAAGATCACATTAGTTTTAACAGCTGCAT<br>CATATATTGCATATGTTGAGC    | 3.399 |
| 99  | A_52_P243391  | Sema4f        | ATGGCTTTCATCAGATTCTCAAGGCCCTTAATGAGGTTA<br>AAGGACCACGGTCCATAGTCAC | 3.391 |
| 100 | A_55_P2082215 | Ttbk1         | CTGACACCAACACCTTGCAAGTCGCTGCACAACCTAGA<br>TCGGGTCTCAGAAGGGAAAGTAG | 3.391 |
| 101 | A_51_P435339  | Epor          | GAACGGGATTGGTGAAGCCATACTTAAAGTCAGAGCT<br>GACCTTGGCCCTCTGAGCAGGAA  | 3.378 |
| 102 | A_51_P131164  | Enkur         | GCAGTGTGAAAGAATAGTTGAATTATTTGCTTGCTCT<br>AGAGAAAATTTTCTCCTCCACT   | 3.361 |
| 103 | A_55_P2147101 | Sytl4         | CCAGGCTCAGACTTGTCTTTGATATTCTACTTTAATAT<br>GCATGTGTGTTTTCAATAAAGC  | 3.339 |
| 104 | A_51_P509643  | Snca          | GTCTTGTGTGCTGTGGATATTGTTGTGGCTTCACACTT<br>AAATTGTTAGAAGAACTTAAA   | 3.338 |
| 105 | A_55_P2068673 | Stmn2         | TCTCTTGTATGTCATTGTGAGCAAGCTGTGATGAATA<br>AAGAATTGGAGTTCTGTGAACT   | 3.316 |
| 106 | A_55_P2024461 | Tbkbp1        | GAGAGGGCCAAGTGCTCTCTGAACAAGTTGAAAGTCC<br>AAATAAACTTACCTGTCCATC    | 3.309 |
| 107 | A_55_P2024841 | Gstt1         | ACTATAATCACTACTTTCCCTTGAGTCTGGGTAATAAA<br>CTGGGGCTTGATTTGGGCTTT   | 3.266 |
| 108 | A_51_P112223  | Gsta4         | GCTGGAGTGGAGTTTGAGGAAGAATTTCTTGAGACAA<br>GGGAACAGTATGAGAAGATGCAA  | 3.259 |
| 109 | A_66_P122086  | 9030619P08Rik | GCCCTACTGCGTGCAAAAAGATTCAGGGGCTGGAAT<br>GCTACCAGTGTGTTGATGTCCCA   | 3.258 |
| 110 | A_66_P129029  | Taf10         | GCATAATTCGGCTCATCTACTAGCTGCCAGAAATTC<br>ATCTCAGATATTGCAATGATG     | 3.245 |
| 111 | A_51_P460048  | Cnrip1        | AACATAAAGGTGGCACTAATACATACCCTTTAACTTGA<br>ACTTTGTACAACCGTGTATGGA  | 3.234 |
| 112 | A_55_P1959425 | Slc16a3       | CTGGGCAGTGGTCTGTTACCCTGAGTCCACCCTTTG<br>TTAAATAACAACTGCTGATTC     | 3.227 |
| 113 | A_55_P2123496 |               | CTAAAGTCTGAAGTCTTAAATTGTTCAAGGCAATCGCT<br>TAACTGTCAACCCTTATGTAAT  | 3.221 |
| 114 | A_55_P2147083 | Tnfaip6       | AATTTATATTAGATTTAAGGTTGTTTTATAAATATTG<br>CTGTAATAAATACTTTTGGAT    | 3.217 |
| 115 | A_55_P2021704 |               | ATTCTGCACCGTTTCTTGCTAACTTGAGGCTGTGGAT<br>AATACAGCAGTTTACTTACTGA   | 3.211 |
| 116 | A_55_P2126790 | 1500009L16Rik | CAGCATTTGAAAATGAACTCGTTAAATGTGCATGCTAT<br>ACACATATGGATTAAGTCCTC   | 3.202 |
| 117 | A_52_P365660  | Lrrc4c        | GCATGAACCGTTATTGATCCGAATGAACTCTAAAGACA<br>ATGTACAAGAGACTCAGATATA  | 3.201 |
| 118 | A_51_P344376  | Gpr162        | CCATCCAAGTGACCAGATACCCAACGCACCCGCTTCA<br>CCCCTAGCAAAATGATTAATAAA  | 3.200 |
| 119 | A_55_P2043200 | LOC635905     | AGTACAATTACGCAGTGTGAATAGGAGGAAGACAGTG<br>AGCCAGCTGATTCAAGTGTGTT   | 3.198 |

|     |               |               |                                                                   |       |
|-----|---------------|---------------|-------------------------------------------------------------------|-------|
| 120 | A_52_P549827  | Mgst1         | AGAATTCTATATTTTCAGTGGATTCAAACCTTTTCTGA<br>GGTTTTAATGCGTGAAAGGAG   | 3.195 |
| 121 | A_55_P2129261 | Arhgap36      | TGATTGTTCAAACCTTCTCTGGCATTTCATCATTAAATAA<br>CATCTGTGTGTGACAGCAGC  | 3.189 |
| 122 | A_52_P151116  | Kcnab3        | GAAGACTTAAATCTAGAACTAGAGTCACACTTTGTGTT<br>TACAGAGAGGGGATAAAGTTGG  | 3.187 |
| 123 | A_55_P2015495 | Abat          | GGTGACCACGTGAACAGTTCATGAATTAATGTTTCC<br>TGTGTTAATCAGTATTCTTAAA    | 3.186 |
| 124 | A_55_P2141943 |               | GTCATAGGCATGTCCAGATTTAAGTGTAAACATCTTA<br>TTTTCCACTGATGAATCTCAAG   | 3.179 |
| 125 | A_55_P2157033 | Bace2         | GACTGTATCTTGATTACTCTTGATTTCCAAGCTTTCAGA<br>TCTTTTCTACTTCAGAGAGAA  | 3.171 |
| 126 | A_55_P2183587 | Gli1          | GGGGCTGTATTTAGTCTATGTATGTTCCAGGAAAGAAC<br>AAACTTTAATAATGACACAGTT  | 3.155 |
| 127 | A_55_P2013043 | Serpinb6b     | CCTTCATCCTCTCTGCAGCAATACTGGGATCTCAATTT<br>TTGGTTACTTAGTAATTTATT   | 3.142 |
| 128 | A_55_P2104988 | Accn2         | TTTAGAGATCAGAACTCCCAGAAAGAAACAGGGCAA<br>AGCTGAGAAATGTACACTGGCTG   | 3.127 |
| 129 | A_51_P275454  | Trim30        | CATATTGCTTCTAGCAGATAGAAGGTATCAGATACTGT<br>ATCTGTTAAGTTTTTCTACCC   | 3.105 |
| 130 | A_52_P262219  | Fos           | GGACTTTATTTCCAGTAGATAGAAATCAATAGCTATA<br>TCCATGTAAGTGTAGTCCCTCAG  | 3.105 |
| 131 | A_55_P2067505 | Slc16a3       | GTGGTCTGTTCCACCTGAGTCCACCTTTGTTAAATA<br>ACAACTGCTGATTCTTAAAAA     | 3.100 |
| 132 | A_55_P1974645 | Entpd2        | AGAAAGGCAAGCACCAGAGACTACAGGCTAGGAGTC<br>AGCTCCATGCCTACTTGTAAAAAA  | 3.095 |
| 133 | A_51_P116601  | A330021E22Rik | CGGGTGAAAGTGAAGCCACCACTGAATGATCCTAAAA<br>AGAGCATCCCTACATGATGTGTT  | 3.086 |
| 134 | A_55_P2162988 | Tmem179       | TGGTAGTGATGCCTCCGTGTGTCTGATCCTCAAGTCAA<br>AATAAAATAAAGACGAAACATC  | 3.084 |
| 135 | A_51_P429335  | Prss16        | AATGTAGGCAAATGATTACTGTCTTTGTAGGTAGTGA<br>TATTCTGTATGGTAAATGTCAG   | 3.083 |
| 136 | A_55_P2058671 | Zfyve28       | GGAGGTGGGAGAGTGTATAACAGAGGGGAATATTAT<br>GTATTGAGATGATTTTTATTTTCT  | 3.080 |
| 137 | A_55_P1955656 | Ctla2a        | AACACTGTGGTGTAAACTCTGAGGCACATTTCATGCAAT<br>AAAACACTAGTTTTGGCAGTC  | 3.076 |
| 138 | A_52_P387009  | Egln3         | ATCCCAGCATTTATTATGCACTATGTTTACTTCTTACTT<br>GGGGAACCTAATTATCCAGAG  | 3.070 |
| 139 | A_55_P2095899 | 2310057B04Rik | GTGGCTAAGTGGCTTCTGTACTTTGCACGTCTTGAA<br>ATTATTGTTAATGAAATATTG     | 3.069 |
| 140 | A_52_P138806  | Dlgap3        | CCACACCTGTGGCTGTTCCACATCCCTTTGAGTATCCC<br>AGGAAAAATAAAACCCGAGAA   | 3.068 |
| 141 | A_51_P271425  | Lhfpl4        | ATGTGTCTTAGATGTTCACTGTCCAATTTGGTAACATTT<br>CTTTTGGTCCCGCCCTTCT    | 3.063 |
| 142 | A_51_P401987  | Tmem37        | GTGCCTCTGTACGACGGCACAGTGAGCTGGATAGGTT<br>AGTCATGCTATTAATAATCTCAAT | 3.050 |
| 143 | A_55_P1982404 | Gpm6b         | CTATCAGTGCCAAGGGCTTCTGTAGTCTATTCAAGT<br>GTTACAATAAATATTTGTAGAT    | 3.041 |
| 144 | A_52_P432919  | Rab3d         | CTATTCCTGACCAGACTCCCCTAAACACTATCTGACAT<br>TTCATGGTCCAGGTGACAGAT   | 3.037 |
| 145 | A_55_P2237432 | Smarca1       | TAAGGCAGTGTGTACGGAATGCTCCCAGTTTAGATTT<br>GACTGGTTCATCAAGTCGAGAA   | 3.033 |
| 146 | A_55_P2065364 | Tdrkh         | GGAGAAGTATCTTAGGAAATGTGTAACGTGTTACAA<br>ATATGTGTCTGTATACACACAAC   | 3.032 |
| 147 | A_55_P2021187 | Malat1        | CGTCTTATTACCTCTGAGTCGACACACCTCCTACTATTT<br>ATTGAATACTTTGATTTTATG  | 3.029 |
| 148 | A_55_P1991079 | Phf21b        | GGCTAGAGAAAGTGTGTTGCTTAAATATTCCAGTGTAG<br>TTTTCTTCTGTATGATGCATT   | 3.024 |
| 149 | A_55_P2049752 | Pamr1         | TGATCCTTTCCCTTTCCAATCTTCTGTACACATTTCAATA<br>AAACAAGGTCTGCTCCCTGA  | 3.020 |
| 150 | A_51_P265495  | Ly6a          | TATGAGTTATAGAAGCTCCAAGGTGGGAGTAGTGTGT<br>GAAATACCATGTTTTGCCTTTAT  | 3.007 |

**b) Down regulated genes in SAHA treated MEF**

| No | ProbeName     | Gene Symbol   | Sequence                                                          | Fold change<br>[SAHA] vs<br>[DMSO3] |
|----|---------------|---------------|-------------------------------------------------------------------|-------------------------------------|
| 1  | A_51_P495780  | Plin4         | CAGCCTGTGGGTATGAGACCTGCCCTGAATCAGGTCT<br>GGCTCCCTATACTGCTCATGGTA  | 10.405                              |
| 2  | A_51_P378051  | Aoc3          | GAAAAGCTAAAAATGAGTAGGCGATAAGTGTACATTT<br>GTTTATTCTGCTGCATTCCTTG   | 6.298                               |
| 3  | A_51_P397437  | Prss46        | TTGAGCCATCTGAAGTTACCATGTTCTTGACTTTGACC<br>AAAACCCCTTAGAGCACCTCCC  | 5.949                               |
| 4  | A_55_P1981681 | Syt8          | AGAAAATGGAAGAAGAGCAAAACATCTCCAAGAAA<br>GGCAGGACTACCCCTACTTCAAC    | 5.535                               |
| 5  | A_55_P2093705 | Meig1         | GGCAATGCTCCTTTAAGAATTGGTTGTTTACATTCTCC<br>ATCGTGAAATGCATTTTAC     | 5.039                               |
| 6  | A_55_P2052016 | Crispld2      | TGACAGGGCCACACTGGTTGTTGCTATGGTTTCAATA<br>AAACGGATTTGATTTCTAACAC   | 4.843                               |
| 7  | A_52_P619248  | Prl2c5        | CAGTCCAGAACGGGGTTAATGCCCTCATGAGCACCAT<br>GAATGGAGATGAAGAAAATAAGA  | 4.693                               |
| 8  | A_55_P2057380 | Gm6745        | AAATGTCAAACAGAACAGACTGAGAAAAAGCCAGATA<br>CCTTTCACAATAGCCTGAAAAAA  | 4.679                               |
| 9  | A_66_P119376  | Kctd12        | AAAGCTCTTCTATATCCAAAGGGAAACAAAAACACAT<br>GGATGAAATCTTTTCAGAGGTGC  | 4.649                               |
| 10 | A_55_P2004016 | Crispld2      | CGGTGAGTGCTAGCCAAACACAAACAGGGTTGCGTGC<br>TCCAGCCAAATATTTCTTAGACC  | 4.607                               |
| 11 | A_55_P2004752 | Prl2c5        | GGTCTTGCAATCTGACAATGAAGATGCTCGCATTCTG<br>TCTTCATATGGCATGATCAGCT   | 4.505                               |
| 12 | A_55_P2076866 | Megf6         | CAGCAAGTGGGATCAAGGGTTTTGTAACCCAGTGA<br>GTTAAAGGCACAGTGGTGTCCCC    | 4.405                               |
| 13 | A_51_P235088  | Dusp27        | TGGGAAGATGTAGAAGAGTCATCTAAATCAGACTTCG<br>CTGAGTTTGGGGCCAAGAGGAAA  | 4.186                               |
| 14 | A_55_P1994128 | Tmem184a      | AGAGTTGCCAGTGCCAGCCTACCAGCAACTATCTGC<br>TTATTTATAGATAAACACCTTG    | 3.928                               |
| 15 | A_51_P352385  | lsm1          | GGGGTGGGTAGTAAGTGAATGTGCAGAGTCAAATCTA<br>AGACATCGTTTTCAATGGCTTTA  | 3.858                               |
| 16 | A_55_P2040893 | Tnni2         | AAGCACCCAACATCCAGTCTGGGAGTACTTGGCCTCGC<br>TCCAATAAAGGATTCACATCTC  | 3.832                               |
| 17 | A_55_P2172196 | Thnsl1        | GCCTGGGATACATGAGGTCCTGTTAAAAACAAACAA<br>CAAACAAACAAACAAACAAACAA   | 3.737                               |
| 18 | A_55_P2385792 | 4933431K23Rik | CTACAAATCCTTTTGACAGATGGGCAAACTCACAATG<br>TGGAATCCTTGAACATAAAAA    | 3.720                               |
| 19 | A_52_P382886  | Gjb2          | CAAGTTGAACCATTACCACTATGCCTTATGTGTATCCTA<br>CAAGATGACAGTCAACAAATC  | 3.710                               |
| 20 | A_55_P2045571 | Adam12        | GACCTAAGATGAGATGTTTACTTTCTATTCAAGGCCTT<br>ATCGGAAAATAGCTCCCCACCT  | 3.604                               |
| 21 | A_51_P205215  | Klhl30        | CCCTGGGGTGTGTCAAAGCTTGCTCCGGGGATATG<br>CTGAGATGGGGTGGAGCTAACAT    | 3.577                               |
| 22 | A_55_P1960631 | Col8a2        | ATGGTCTCTACTCCACCGAGTACATCCATTCGCTCTCT<br>CAGGATTCTTGCTCTGTCCCA   | 3.575                               |
| 23 | A_55_P2130032 | Zfp599        | ATGAATGTAAGGAGTGTGGGAAATCATTCTACCAGAA<br>ATCAAACTCACTACATCAAA     | 3.549                               |
| 24 | A_55_P2083879 | Vsig2         | ACTTCTGATCGCTGAGGGTGGTGAGCGTCCATGTTAAT<br>AATTAAGCCTAAACCATGCCA   | 3.517                               |
| 25 | A_51_P372393  | Angpt4        | TCTCCAACCTCAATGGCATCTACTATTCAAGTTCATCAGC<br>ACTTGCACAAGATCAATGGCA | 3.493                               |

|    |               |               |                                                                  |       |
|----|---------------|---------------|------------------------------------------------------------------|-------|
| 26 | A_55_P1987430 | Fam196a       | GGATGACCCTTCTCCTGGAAAGATTGAGCTCAAAAGTT<br>TCATACAAAATAAGTAAAAAA  | 3.467 |
| 27 | A_55_P2130501 | LOC100044727  | AATGATTGGGATGTATTCCAGTCGACACACCATACCA<br>TATGGGGATGCCCTAATTTC    | 3.444 |
| 28 | A_66_P116372  | Soat2         | ACACGTTTGGTTCTTTCTGCTTCTCCAATGCAACAATA<br>AAAATCTTAGTCTCGGACTGG  | 3.431 |
| 29 | A_55_P2115851 | 9930013L23Rik | ATCTGAGAGTGGTTGGCTCCAGACCAGGATCTTTCAGC<br>TTATGTTCACTCTGAGCAAATA | 3.409 |
| 30 | A_66_P123449  | Gm847         | CTTGCAACTTGAAAGACTTTCACAGAAGACATTGCTA<br>CTAAAATAAAAACATCTGTATC  | 3.330 |
| 31 | A_55_P2069659 | 9930013L23Rik | AGGGGAACCTCACCACACCAGAAACATGGGGAAGG<br>CTTCTTCTGGAAGGTGATGGTCT   | 3.320 |
| 32 | A_55_P2092551 | LOC100044328  | CCATTATATCTGTAGCATTGTGACTTCTGATGTTTCTTA<br>ATAAAGCTTATATTCTGGGC  | 3.269 |
| 33 | A_55_P2348126 | 1500032F14Rik | CATCGAGTCCAGGCCAGCCTCAAAAACAAAACAAA<br>CAAAATAAAATGGCATTCAAATC   | 3.251 |
| 34 | A_66_P103185  | Olfr1418      | AGAGAACTCAAGGATGCTTTGAGGAGAGTGATAATGA<br>AATTGGTCTGATCCAAACACAA  | 3.248 |
| 35 | A_55_P1968799 | Krtap1-5      | CTGCTAAGAAATAGGCCAGACCATTCTACACTTTTCCA<br>CTGGATCCTTCTTATTTTTT   | 3.245 |
| 36 | A_55_P1995473 | Ptger1        | CCTGCTCAAGCACACTCCAGTCCAGATGCACACAGAG<br>GCTGAAAATGCATGTATGGAGT  | 3.228 |
| 37 | A_55_P1995055 | Prr7          | AACTCTAGCCTGACTGCGAGGCTTTTTAAATGCTTCC<br>CTTGACTGCAGGGAGGGGTGG   | 3.216 |
| 38 | A_55_P2138718 | Gm14483       | CTACTAGCTGGGGAGCAAATCAAATATGCTATTA<br>GCATCTAGATCAAACCCAAAAAA    | 3.215 |
| 39 | A_51_P220150  | Angptl7       | TAACCTGAGGTCACTTAACCCATTTCCCTAACTGAG<br>GCTTAGATGACACGAGGGAAAA   | 3.205 |
| 40 | A_55_P2315747 | 4930571B16Rik | TGCTAGAAAGAGAGGTTGGAGTGTTAAGGAACCCTAA<br>TAAAAGTAGGTTTCCAAAGATCT | 3.187 |
| 41 | A_52_P381484  | Spon2         | CCACAGGAGGAACAAACGAAGAGGGGCAGTTTTTCG<br>AAACTTGGCCCTGTGTGTCGTG   | 3.182 |
| 42 | A_55_P2128929 | Cc2d2a        | AACAAAGATGGAAGAGTACAGAACATCTCATCAGCAA<br>TGGAAGCCTGGAGGAAAGCCCA  | 3.181 |
| 43 | A_52_P89335   | Tmie          | ACCTGGCAGATACAAAGCTTTGAAAACAAGGTAACAG<br>TGTGACAGACCTGAGGCCACTGA | 3.152 |
| 44 | A_55_P2121956 | Gck           | ACATCAGTGATCCGGGAAGAGAAGCAAGCCACCCACA<br>GCATCTCTCCAGGAAACCACCA  | 3.151 |
| 45 | A_51_P462271  | Acan          | ACAGGCTGGCTGAAGAGAAGCAGAGCCCTCTCCTAGG<br>GACCTTTCATCTGGGTCAACCAA | 3.143 |
| 46 | A_52_P484956  | Nnat          | TGGATATATTCAACCAGTAATTGAATCCACCTTTACCA<br>AAACAGTTCTCTAACCCTCG   | 3.105 |
| 47 | A_55_P2344598 | E330037I15Rik | GAGGAGTGCTACAAGTCTGAGGTACCATGATCTACTT<br>AGCAACACCTTCTCTGAAAAA   | 3.092 |
| 48 | A_51_P315890  | Kcnk6         | TGGGAAGTGATGACTATTCTGGTTCTGAAAGCAGAA<br>CTCTGTGAGTTGAACCCTTGTC   | 3.054 |
| 49 | A_55_P2452914 | N4bp2         | AATTGTCTCTGGAGTAGATACAGGCACTTGTAACCCAGA<br>CTGAACCCCAAGATTTTGTCT | 3.053 |
| 50 | A_55_P2002903 | Smoc2         | GCTCATGTCAATGCTGTCTACAAACGAGTATGATCCTA<br>ACTGTTTTGGATAATCTTTAT  | 3.044 |
| 51 | A_51_P282616  | 4932425I24Rik | GGCTCTATTGAACTTAACTCTGCAATCTAAAAAATA<br>AGACTATTGGTTATTTGGGGGG   | 3.019 |
| 52 | A_51_P218653  | Jph2          | TCGGACCTAAAACCTTGCTCACATCCACTCCATGGACA<br>TTTAAGGAGGCCTCCAGAGAGC | 2.991 |
| 53 | A_51_P507051  | Bhlhe22       | TTCCAAAAGGGGACCTATTTGCATTCCAAAACAGAAAA<br>ACATCACAGCAATAGATTTTAC | 2.983 |
| 54 | A_55_P2197777 | 3110001N23Rik | AAGAGTCAGAGCACTCTTGCCCGAATTTATTTAGCAA<br>ACAGAATTGGGCTTGATGACTC  | 2.976 |

|    |               |               |                                                                   |       |
|----|---------------|---------------|-------------------------------------------------------------------|-------|
| 55 | A_52_P409769  | Mrv1          | CAGCCTTGTGTTTCCAGACGTAAGTGTGAAATGGAATA<br>AAAGTTTCCCACTCAAGATGCC  | 2.975 |
| 56 | A_52_P84027   | Cyp7a1        | TTGTTTTTAAAAACAAGTTTTATGACTCCCTGAACTGAAT<br>GTATCCACATACCTTCCCATG | 2.972 |
| 57 | A_55_P2079732 | Myo1h         | TTTCAGGTGGCGCTGTATCTAGTCGCTTCTGAGAGCC<br>AACCTAGAGTCTTCCCTGTCC    | 2.962 |
| 58 | A_55_P1995104 | Btbd19        | ACTGGTGGTACGTGGGCAGGCTGCACCCTTTTCCACA<br>GCACCTCGAAGCCTCATCAACAA  | 2.962 |
| 59 | A_52_P283055  | Slc5a3        | GGCTTCAGTTTCAAAGAAAATAGAATTTGATATAAGCC<br>AGGTTACTTCCATCTTGAAAGG  | 2.956 |
| 60 | A_55_P1968618 | LOC100045418  | CTTTATGCTTAGATTAGTTGCCTTCTGTATTTTGTACA<br>GTAACACGAAGCTAACCGTTT   | 2.947 |
| 61 | A_52_P87763   | Olf860        | CTCCATTGTTAGAGTTCCTTCATCTGGGGGAAATGTA<br>AAGCGTCTCTACTTGTGGATC    | 2.946 |
| 62 | A_52_P657360  | Tnni1         | AGGTGTCCATGGATCTGCGGGCCAACTCAAGTCTGT<br>GAAGAAAGAAGACACAGAAAAGG   | 2.930 |
| 63 | A_55_P1997115 |               | CTCTTACTGTCAGCAATTACAAAGTAGCTTCTGCCGA<br>ATATTGTTGCAAAGCCCTGTAA   | 2.914 |
| 64 | A_51_P208922  | Stc2          | AAGCAGTGAGTGGGAAGATGAACAGTCTGAGTATTCC<br>GACATCCGGAGGTGAAATGAAAA  | 2.911 |
| 65 | A_51_P302520  | Myom1         | AAGTCATCAGATCTTATTCTATAGATGAGGAGGCCA<br>CCATTGAAGAACACATTAAGGG    | 2.888 |
| 66 | A_55_P2049368 | Olf1097       | CAAAGAAGTAAAAGTGTGTTGTTAGAGTTATGAAG<br>AAGAGAGAGTGCACCCAGAACT     | 2.882 |
| 67 | A_52_P28960   | Gdf6          | CTAAAGTTACTGGAGGTGATTGATATACAAAACATTT<br>TTACAGTATACCTTCTGGACG    | 2.882 |
| 68 | A_55_P2080880 | Clcnkb        | TGACTTCTGGGGTTGCCTGCTGCTAACCAGGAGCTTCT<br>GAGAAAATAAACTGATGTCT    | 2.866 |
| 69 | A_51_P372550  | Cgref1        | CTTCAGTGGAAAGTAGGACTTTCTGTGCAGCTCAGGG<br>AGACCATAAGCTGAGAAGCAGCT  | 2.865 |
| 70 | A_55_P2028971 | Odz3          | AGGAGTTAATTTATGTAAAGTGTAAAAAGTTTATAC<br>TTAAAAATAAAATGATAAAAAC    | 2.854 |
| 71 | A_55_P2126363 | Wnt10b        | GGGTGGGAATGGATAATTTATTTTACTGAGATGTGTTT<br>TTGGTCTCTGTTGAAACTAAA   | 2.850 |
| 72 | A_52_P1011    | Fgf14         | GCTGGAGATGCACCTTAAAGATTTTCATGCAAAGTGTTC<br>TATAACAGATATAAAAAGCTTC | 2.840 |
| 73 | A_66_P118600  | Lama1         | ATGTTGAACATAAGCCACACGGACAACAGATACCTCTA<br>TTAAATGGTTTAAAACGTCAGT  | 2.840 |
| 74 | A_52_P173442  | Wscd2         | TGGCCTCCTCTGGTACGAACTTCTGTTTGAAGATTC<br>CTCAGGTCAACACTATCATTAA    | 2.838 |
| 75 | A_52_P294514  | 4930542N07Rik | TTCTGGTTTTAGTGTGATAGCTTTCAGGATTAGCTGC<br>ATGAAAGATCCATTCTAATGA    | 2.838 |
| 76 | A_52_P249856  | Cc2d2a        | TGGTTAATATTCAACACCATGATTCTCCACTAAGGAT<br>AAATTTTGATGTCACAAAGCCC   | 2.826 |
| 77 | A_51_P501844  | Cyp26b1       | GTTCTGTGTCTCGTTGTTGTTAGCATTAAATGGGTGATG<br>TAGTCTCACATTCCTAACTATT | 2.807 |
| 78 | A_55_P2143376 | Gm6651        | CCAAGGCACAATGCCTTGTGTTCTGGGAAAACCATAA<br>ATTCACTTTTATATCCTTCTCC   | 2.804 |
| 79 | A_55_P2037121 | Tmem106a      | TTCAACAGCAACTTCTATCCCATCACAGTGACACAGCT<br>GACGGCCGAGGTGCTCCACCAG  | 2.803 |
| 80 | A_55_P1980401 | Cbx7          | TTAGATGATTTATCTGATAGATGAGGCAAAAATTATTA<br>AAAAATACATTAATGTCCTT    | 2.801 |
| 81 | A_52_P505192  | Ntn3          | TGACCACAGATTTTCTTGACAGACCTGACTCAGTTCA<br>GAAATAGTGTCTGTCCTTCTT    | 2.794 |
| 82 | A_55_P2032853 | Entpd1        | CTAGGCTTTGTGTATGCACATGGATGTGTATGAGAGA<br>GAAAAGTTTCAATTCATCTAAAT  | 2.792 |
| 83 | A_55_P2027392 | Gpr146        | CAAAATTCTGTGAATGTGAAAAAGAACTACTGATGG<br>GATCCACACTTCTGAAGACTATT   | 2.791 |

|     |               |               |                                                                  |       |
|-----|---------------|---------------|------------------------------------------------------------------|-------|
| 84  | A_55_P2132323 | Mthfr         | AGTAACTACTGCGGCTTGAAACCATCTGCATATGA<br>CCTGCTGCCAGCAGCACCCGGA    | 2.776 |
| 85  | A_55_P2428514 | Retn          | ACTCACGTGCGGAATCCACACACAAGCACATACTT<br>AAAAATAAAACAAAACAGGCTG    | 2.768 |
| 86  | A_51_P304397  | Cpm           | AACAGGAAATAAATGGATGGGGAAGTGTCTCAGCTAC<br>CGCTACAGACCTTCCAGAACGC  | 2.764 |
| 87  | A_55_P2099650 | Slc24a3       | ACTTATCATCCATTGCGGTATGGTTTTCCAGTCCCTGT<br>ACACATCCTGGTTGAATTGT   | 2.761 |
| 88  | A_55_P2062627 | 2210411K11Rik | AATGTGGGCAGACTGAATCTGAGTGTAGACCACACAC<br>TTCAAGAAAAGGTTTGGCAGTG  | 2.759 |
| 89  | A_55_P2143832 | Col4a4        | GTACCCATGCAAACGCCACCCACAGACATACTCATA<br>ACATAGAAAACAAAAGTAAATAA  | 2.755 |
| 90  | A_55_P2141088 |               | AAACCAGAAGTGATCCCGTGTAGCCTTCGTTGACAAAT<br>AAAAGACTATTTGTGTTTAAA  | 2.750 |
| 91  | A_55_P2086820 | Zfp651        | ACATGTGGCAAAGCCTTCAAGAACTGTGGTCTCTTCA<br>TGAGCACAACAAGATAGTGCAC  | 2.749 |
| 92  | A_55_P2068233 | Phactr1       | AACTCAATGAGTTTAAAGTACCGAGATGGAAGTCCA<br>CGAGTTAAGTAGACACTTAACCA  | 2.743 |
| 93  | A_55_P2141084 | Odz4          | TCGCCTTATGTTGTCCCACTGGGATAAGAGGATGTGT<br>TCGTTAAGTCTCTTCTGATT    | 2.732 |
| 94  | A_55_P1967643 | Plb1          | CCTGGGAGTTCATGATCTCTTTTTGGAAAGATAAAAA<br>GAAAGAGAGGCCATACTCAGTG  | 2.699 |
| 95  | A_55_P2107045 | Myl4          | GTTACTGTTACGGAGTATTGGACTCACATGGCTTCTCT<br>GACCACAACCTCCCTGGAAA   | 2.694 |
| 96  | A_55_P2019294 |               | AGGACTAGTCCATCAGCAGAACCCACCCCAATGAA<br>GCATGCATATATTCATCTTGAAC   | 2.693 |
| 97  | A_55_P2333580 | BC020402      | TTTTTTTGTAGAAGTGTTAAGTTAAATGAAGGCATGT<br>ATTAACAGCACTGGGACCCCC   | 2.693 |
| 98  | A_51_P520849  | Sfrp2         | TCGGCATCTAAGTCTTCAAACATTTGTTGCTCGTTTTA<br>TGCCCTCATGAGCTCTGACCA  | 2.687 |
| 99  | A_55_P2160825 |               | GATAATCAGATCTCCAGACAGTTTGTGAACCACTTCA<br>AGTTCATAAACCTCTAGTCTGA  | 2.680 |
| 100 | A_55_P1978047 | Aven          | ACTGGGATCGTATCAAGATACTGAAAAGGAGGTCAA<br>TGGTGAAGTGGAGAATCTCAGC   | 2.673 |
| 101 | A_55_P1961180 | 4930429B21Rik | CTTGTTTCATAGAAATGTAATCTCATGACAGAGAAAA<br>TGGCCCCACAAATTAGAGCTTT  | 2.666 |
| 102 | A_55_P2052690 | Sym           | GTTACTACGGCTGTGGCTCGTCATCTTATACTGTCA<br>GAGATGTGCGGACTTATTTTT    | 2.664 |
| 103 | A_55_P2277475 | 9330179D12Rik | GACTACCTGTAACACCTCACCCATTGCTATGTAATAAG<br>CCTAATAAAGTCGTTGGTTTCC | 2.664 |
| 104 | A_52_P446457  | Ly6g6f        | CCAGGGTCTCGGGACAGAGAACCCTCAGTTCCTCATT<br>TCAAGCCTGAAGTCCAGGTCTA  | 2.664 |
| 105 | A_52_P498193  | Aldh1l2       | TAAATTGCCTTCCTAAGTTTTGCTTTTTGTTTCTGATT<br>TCAGGATTTATATGGGGCGG   | 2.663 |
| 106 | A_52_P362981  |               | CAGGTTCTCATTGTAGATGGAGTGTTCGCTGTAGTA<br>CACCAAGTTGACCAAAAACTAA   | 2.658 |
| 107 | A_66_P105711  | Ap4s1         | CCAGTGCCATAACTTTTAAAGGATATTGCAAAGAACT<br>GGGAAAGGGTAAAAAATGATC   | 2.650 |
| 108 | A_55_P2145237 | Gm7210        | ATTTCAAATTCCTTCATCAGTGCCTGCAGGAGCCCAG<br>GACTAGATCTCAAGCTTCTTA   | 2.639 |
| 109 | A_55_P2133948 | Olf1465       | AGCATGAGGAACAAAGAAGTCAAGCGTGCAATCACAA<br>ACGTTTTCCACAAAGCAAATAG  | 2.632 |
| 110 | A_55_P2240823 | Epb4.1        | AACATCATGACAACAGAGAAGAGTTTAGCGGCTGAAG<br>CTGAGAATTCTCAGCACCAGCAA | 2.622 |
| 111 | A_55_P2052416 | lqsec1        | GCAGAGCAAATCTGAGTCTGACTACTCAGATGGGGAC<br>AATGACAGCATCAACAGCACCTC | 2.614 |
| 112 | A_52_P16356   |               | CTGCCGTTAACCGTGCACATACTAATGTTCACTTGTGT<br>GGGAATCCAATGAAAGAAAAA  | 2.600 |

|     |               |               |                                                                  |       |
|-----|---------------|---------------|------------------------------------------------------------------|-------|
| 113 | A_51_P220135  | Nfatc1        | ATGCCCTTTAAAAATGAGGACAATAGCTTTGTTGCATT<br>CTCAAACAAGGACATCAGTGAA | 2.600 |
| 114 | A_55_P2167236 | Olf1184       | ATTAAGGAATTACTCTGCAGAAGGAAGACACAAAGCC<br>CTTCTACTCTGCATCTCATAT   | 2.581 |
| 115 | A_51_P487555  | Cd7           | GGAGGTACCTGCCTTGAGCCGCTGGCCAGGAAAA<br>TTAAATAAACACACAAATACATT    | 2.580 |
| 116 | A_55_P2073694 | Gm266         | TTCTGGAAATCACGACCAAGAGCAAACGATGGTGG<br>ACCGCGTGTTCACGAGGTGGTG    | 2.577 |
| 117 | A_55_P2086785 | Olf1362       | TTGTTTATAGTCTCCGTAATAAGGATGTGAAAGGTGCC<br>CTCCACAGACTACTGAGACAGG | 2.573 |
| 118 | A_55_P2302240 | AU017834      | TTTCTGGGTGCATTTTCTCAACACATTGGGTTGCACTC<br>TTTCTTTAAAGCTCTCTCCC   | 2.569 |
| 119 | A_51_P409010  | Comp          | CTGCGTACCGTTGCAATGATACAATCCCTGAGGACTA<br>CGAGAGTACCGGCTGCAGAGA   | 2.567 |
| 120 | A_51_P203182  | Apob48r       | GAGTTGGGGAACGTTGCCAGGAATCCAAGCACATA<br>GGAGTAGAGAGGGTTCTGTGTG    | 2.560 |
| 121 | A_55_P2081318 | Gnas          | ATGGGGGACATTGAAGGGATTTGCTGGAGCCATCCCC<br>AACAAACAGCAAACATAAACATT | 2.549 |
| 122 | A_51_P456721  | Azgp1         | AGACTGAGTTCCTCTCAATGTCAGATCAATCACCTTG<br>CCTTGTAACCTCTCTTGAT     | 2.546 |
| 123 | A_66_P101724  | Fam124a       | CCATGTCATGACCCAAAGCCACACAGGGTGTCCAAG<br>GCATGCTATTGCCTCCAACAACA  | 2.538 |
| 124 | A_55_P2114626 | Hiomt         | GACATCGGCGGCGGGGAAGCGACATCACAGACAGGA<br>AGTGAAGTCGGCACCCAGGACTGA | 2.534 |
| 125 | A_52_P103998  | Htr1b         | CATCATCTACCATGTCCAATGAGGACTTCAAACAAG<br>CGTTCACAAAAGTATACGCTT    | 2.527 |
| 126 | A_55_P2165199 | Cxcr6         | AATGTATAAAACAGAGCTTAAGACTTTAACAAATACAA<br>GAGGACTCTGGTGGCTTTGCTC | 2.524 |
| 127 | A_55_P2034968 |               | AGAACAAGACTCCTAACTGCCATGTGCCAGAATGAGA<br>TGGTGAAAAACAAACAGATCTGC | 2.523 |
| 128 | A_55_P2089520 | Col10a1       | GCCCGGAGTATTTAATCTACTTGGTATTACGAAGCAAT<br>AAAATGACATGAATAGACCTTT | 2.523 |
| 129 | A_51_P444822  | Olf1574       | TACATTATGAGGAGCCTTAGAGGAAGGTGGGCTAGAA<br>GGAGACAGTTTTCCAGTACATGA | 2.522 |
| 130 | A_51_P204442  | Phf19         | GTCAATTTGTGGCTTCTGTTGGCTTCAGTGAACATG<br>GCAACCTCCAACACGTGTTTTT   | 2.518 |
| 131 | A_52_P386682  |               | CCTAGGTGATGCTGTCTTACATACAGCCTAAGACAGTC<br>CTCTGAAAATGGCTTACTCTGT | 2.513 |
| 132 | A_55_P2401624 | C630004L07Rik | GGATGCCTTATTACTAAGAAGCACACACAGAATTG<br>AAAACACTTAAATAAATGAGCA    | 2.510 |
| 133 | A_55_P2009988 | Trib3         | GGTTAAGTGTGTATTTTCATCATGTGCCAATAAAAGA<br>GAGCTGTGTGTTTGTATGTG    | 2.505 |
| 134 | A_51_P148684  | Pou6f2        | AAAGACTTGCCCCAGTCATCATCTCCCTTGATGTAAA<br>AGACTAAAAACAAAAACTAC    | 2.504 |
| 135 | A_55_P2112142 |               | CAGGAAAAACAAACATATGTTTCTCATTAAAGAGTGCC<br>TTCCACTCCAACACAAAACC   | 2.501 |
| 136 | A_51_P218953  | Zfp536        | CAGACTTGTGGTAAGTTTTAGAAATCCTCTTCTTCA<br>GTTTCAATTTCCACAAAACGTC   | 2.494 |
| 137 | A_51_P510882  | Adam12        | GAAAATCAAGTTAGCACTAATTACAAAATGCTTTTGAT<br>GCAACTGAAATTTCCCAATGGC | 2.494 |
| 138 | A_51_P204247  | C8a           | GAACCTGGATGGACTTTTTAACAGATCAACATGGAGG<br>AGACTTTTGAAATAGAAATCCAG | 2.494 |
| 139 | A_52_P495869  | Mafb          | GCCGCAACGCAACAGAAATGTTTTTAATTCATGTAA<br>AATAAGGGATCAATTTCAACCC   | 2.491 |
| 140 | A_55_P1961127 | H19           | TAGTCTGGAAGCAGTTCATCATAAAGTTCACATG<br>CCCTACTTCATCCTTTGCCCT      | 2.485 |
| 141 | A_55_P1963439 | LOC100048608  | ACAGTACCACCTTGAAGGGAACCTCTCTTAAGGCAA<br>CAATGGTAAAGTTGGGACTCAT   | 2.478 |



|     |               |               |                                                                   |       |
|-----|---------------|---------------|-------------------------------------------------------------------|-------|
| 142 | A_65_P11603   | Ldb3          | GCATAGTGTTAAGATTAAGGCTGAATGTCGATAGGTT<br>ACCATCACATCTTTACTAGTGCA  | 2.476 |
| 143 | A_51_P519648  | Mical3        | AGAAACAAAAGATATCCACCTGGAAATGGAGAACATG<br>GTGAATCCCGAACCCTCCCAA    | 2.475 |
| 144 | A_51_P207706  | Fam180a       | CCTGGTAATGAGCAGACTTCTGAGATATACTTACACAC<br>ATACCAAGAGTAGGGACTGAG   | 2.472 |
| 145 | A_51_P207591  | Anxa8         | ATCCTCTGATCGTGGTCTCCGAGCCTGAAGAACATGAC<br>AGAACTCTTCTCAATATTCGTT  | 2.468 |
| 146 | A_55_P2052696 | Sym           | GTAAGCTAACACTGGAAAGGAAAATAGGTGCGTTTTT<br>CTCTTCTCATCTTAAAAACA     | 2.464 |
| 147 | A_55_P2107901 | Dlk2          | AAGACTTGTGAAGTGTCTACCTGCTCCAGAGCCTGC<br>CTCAGTGGGCCACCCACAATG     | 2.463 |
| 148 | A_55_P2054688 |               | CCCACAGATTGCCACTACATATTCTATGAGTGTTAGGT<br>CATGATGGAATTAAGAATAT    | 2.462 |
| 149 | A_55_P2396370 | A730056I06Rik | GTTTCATGATAGCCTGGGCTACAGCATGATACCCTGTC<br>TGGAAAAAATAAAAAATAAC    | 2.461 |
| 150 | A_55_P2122096 | Gm2327        | ATTCCTGAACTAACAGTCTCTAATCTGCTGAAAGGC<br>AGCTGGCTAACTGCTGGTGTCT    | 2.446 |
| 151 | A_52_P525183  | Acot2         | GGGGAAACCTCATATATATTATCACAATGTCAGTTCAG<br>GTTAGTTCATTTGAACATATTC  | 2.437 |
| 152 | A_55_P2119927 | LOC100047419  | AGCGCTTTCAGACACGAGAGACTTCAGAAGATAATAC<br>TAAACAGAATAAACGCAAAAAA   | 2.435 |
| 153 | A_55_P2172935 |               | CTAACTCAGTTACTATGGATGGACAAGGTTTGCAGGTA<br>ATGGATTCAAAGTTCAAATTAT  | 2.434 |
| 154 | A_55_P2013630 | LOC100046931  | ACAGTCACTTTGAAAGCGGCAGACTGGCCAAAAGCGC<br>AAGGCTCATGGAAGGTGCCCT    | 2.433 |
| 155 | A_55_P1958597 | Slc27a3       | AGGGTTTTCGGGTATCTTTTGTATATGGAGTCATTATT<br>TGTAATAAACAGCTGGAGCTT   | 2.432 |
| 156 | A_55_P2131989 |               | AGTTCGTAGGGCTCAGTGGTGAAAGCAGCTTATTC<br>GCACCGAAAAACAACTACAAA      | 2.427 |
| 157 | A_51_P302942  | Rasl10a       | GGACAGGTCAGTTTTACCTGAGACCTTATTGGGCATA<br>AGCACAGATGAAAGGACTTGA    | 2.422 |
| 158 | A_55_P2063312 | Mgll          | TATGATGAGCTGGCTCATATGTTGAAGGGGCTGGACA<br>TGCTGGTATTTGCCATGACCAT   | 2.421 |
| 159 | A_52_P622694  | Adal          | GAAGTTGGCATTGCATCTTGCCGAGATCCAAACAGG<br>GAAAAAGAAAATCAGATGCTGCT   | 2.421 |
| 160 | A_65_P19089   | Esrrg         | GGCAGTCTTATGTGCAAAGATCGTGAATGGACAAAA<br>AAAAAATTAAGCTTACAATG      | 2.419 |
| 161 | A_55_P2232325 |               | GTCATCTAGGTATCTCAGCCACACGAAAAGGATTTTAA<br>ATAAATTATACTGCTATTGGCC  | 2.417 |
| 162 | A_55_P2144532 | LOC100045235  | AAACGAAACAACAATGATAAGAGCTACCCACACTGGG<br>TCCACGGGCGAGAAAAACATATC  | 2.416 |
| 163 | A_55_P2094434 | Gm3906        | AATTCACATCCCATCGAGCAGGCCAGATGTATCAGCAC<br>ATGTTTTTAACCCAGCACTTG   | 2.416 |
| 164 | A_55_P2431897 | Thap6         | GAAAAGAGAAAACTTCACTGTAGAAAAAATTCCTTC<br>TCAAAACCTTCCCATCACCCA     | 2.414 |
| 165 | A_55_P1990067 |               | ATAATTTTGAAGACTCCTGTTGGCTCCAGAAGAGAT<br>ATCCTGGTCTTGACCTAGGTGG    | 2.414 |
| 166 | A_55_P1962209 | Cxcr6         | ACAGAGCTTAAGACTTTAACAAATACAAGAGGACTCT<br>GGTGGCTTTGCTCATCTAAAAAA  | 2.414 |
| 167 | A_55_P2297806 | Mapkbp1       | GTAAGACACCTTCGGCAGAGCAAAGTCACATCACCCG<br>TCTCCTGAGAGACCTTCTCTC    | 2.413 |
| 168 | A_51_P442964  | Casc5         | AGATGGACACTATCCTCAAGAAGATCAATAACTGTCTC<br>GCTGAAGTGGAAACAGAACTA   | 2.412 |
| 169 | A_55_P2206491 | 1810062O18Rik | CCACGAATAGTGACGGTGTTCACAGCATGTATTTTT<br>AATATCTCATGAATACTAACAG    | 2.408 |
| 170 | A_55_P2302290 | E230012P03    | GAGACCCTATGAGGGTGCCATGGGAGAAGGTATTTTC<br>AGAATAAAAAGTTTTCTGTACTCC | 2.407 |

|     |               |               |                                                                   |       |
|-----|---------------|---------------|-------------------------------------------------------------------|-------|
| 171 | A_52_P513123  | Dna2          | AACTACCAACTTCGGGTCTGATTCCCAAATCATACAAG<br>TTACATTTAAACAGTCAGACAG  | 2.405 |
| 172 | A_55_P2029962 | Gm1998        | CAGGTGAAAAGCCCTATCAATGTACAGAATGCAAGAA<br>AGCATTTTTCTCCAAGAAACATC  | 2.402 |
| 173 | A_51_P264495  | Pgam2         | ATGGGAACAGCCTTCGGGGCATTGTGAAACATCTGGA<br>AGGGATGTCCGACCAGGCCATCA  | 2.398 |
| 174 | A_55_P2014154 | Cacna1c       | TGACGCCTGCGACATGACAATAGAGGAGATGGAGAA<br>CGCCGACAGACAACATCCTCAGTGG | 2.397 |
| 175 | A_51_P185593  | Sym           | AGTTCCTCTGAGATCAGAACTTTCCCTATAGGTTCAA<br>ACTAGGAAGCATGCACTAACT    | 2.396 |
| 176 | A_55_P2014144 | Olftr830      | AACAGGGATATGAAGGAGGCCCTGAAGAAAGTTATTG<br>GTAGGACAGCTTCTTCTGTGA    | 2.395 |
| 177 | A_51_P106799  | Pparg         | GCAGGAAAGTCCCACCGCTGACAACGTGTTCTTCTA<br>TTGATTGCACTATTATTTTGGAG   | 2.391 |
| 178 | A_55_P2079669 | Bcat1         | ACGATGGAGAATGGCCCAAGCTTGAAGTCAATCC<br>TGGGAAAGCTGACTGATATCCAG     | 2.389 |
| 179 | A_55_P2167733 | U2af2         | TTAAAGAGCTGCTGACATCCTTTGGGCCTCAAGGC<br>CTTCAACTTGGTTAAGGATAGT     | 2.389 |
| 180 | A_55_P2004179 | Col2a1        | GTCTACACAATGGTGCTATTCTGTGTCAAACACCTCT<br>GTATTTTTTAAACATCAATTG    | 2.378 |
| 181 | A_55_P1995060 | EG667885      | GACATGGAAGTCATCCTGATCTACGTCAAATTTGTTCA<br>TGCTCAGAAAATTAATTTACG   | 2.375 |
| 182 | A_52_P620448  | Mab21l1       | GAGACAGTGCAAACAATCTCTTCTTTAAAGGAGTAA<br>CAACACAACATTTAACCATCAT    | 2.374 |
| 183 | A_66_P119350  | 2310040G24Rik | TGCCATACAGGGAGAAGACAGTTCACAGATCATAATA<br>AAACCTAAAAGGAAACCTATCTA  | 2.371 |
| 184 | A_52_P19532   | Fgd3          | CAAGATATTGTGAAACCAAACGCAGCCTGCACGTTTCA<br>CATAACAGGAAGAAAAAGTCC   | 2.371 |
| 185 | A_55_P2083197 | Maml2         | AGGAAGGCTAGCAAACATGCTAAGGCTACAGTCGCGA<br>CTGCCACTACCACAGCTCCTCCA  | 2.370 |
| 186 | A_55_P2049717 | Agrp          | CTAGCCAATGGATGTTGTTGGGCAAAGGCAGGGGAT<br>GAGAATAAAGGATGGGACGGTTT   | 2.368 |
| 187 | A_55_P2011772 | Oscp1         | CAGGCCATTCTGGCTGCATAACAAGATAGATCTTTTAA<br>AAAACCAAAACCAAAACAAAAC  | 2.364 |
| 188 | A_51_P384693  | Kirrel3       | GACATGGTACATTCTGTTCTCCAAGGATTGGGGCTAC<br>TTTGCAGAGGACCCTAGAAGTCTG | 2.362 |
| 189 | A_51_P163261  | Gm6985        | AAGGGGAAAGCCAATGCCAGTGAGGATGCAAATAAT<br>CCTGCAGAAAATGGAGATGCCAAA  | 2.354 |
| 190 | A_51_P213691  | Scnn1a        | TGGGTAGACTGAACTGTGCTCAGGGATGAGCTTTGCT<br>CATTTTTGTATCCTCCGTTCTA   | 2.351 |
| 191 | A_55_P2324425 | 5830403F22Rik | GTTGCCATGCCATTATGAATGTCCCCTCTGGAACCACA<br>AGCCAAAATAAAGCCTTCTACA  | 2.350 |
| 192 | A_55_P2074353 | Sym           | TGGCAAATCACAGTTATGAAGTGGCAATGGCGTGAT<br>TTTATGGTTGGGGTCCAGCACA    | 2.350 |
| 193 | A_55_P2120089 | Zmynd11       | GCTTGTAAACAAAATCAGCAGCAAAAACAAAATCAAA<br>AGCCAAAACACTACCTGACTCAG  | 2.344 |
| 194 | A_55_P1969977 | Myo15         | ACCAGGTACACATGTGATGCAGACATATGTGCAGGCA<br>AAATACCCATATCCATAAATAAA  | 2.340 |
| 195 | A_55_P1965584 |               | GCCGCCTTTTCAGAAACCAAGAGAAAATGGTGGGAG<br>GCGAAAAGAAAACAAATAAAA     | 2.336 |
| 196 | A_51_P145511  | Prl2a1        | CTTTTCATCATATCTTCGCTGAGCCACTGCTTGATGAT<br>ATATTGCTGTGAACTTCCTT    | 2.330 |
| 197 | A_55_P1990066 | LOC100045975  | CAACAATGACTTGTGGTCTGGGAAAACATAACATTCAT<br>TTTTATATCCTCTCCCCCTGT   | 2.324 |
| 198 | A_55_P1976849 | D130009I18Rik | ACTTTCATCTGTAACACAGACAGCTAAGTAAGA<br>GGCTGACTGAAGTAGTCTTGG        | 2.323 |
| 199 | A_55_P2257765 | Gm7111        | TCAGTAGATCATCTGATGTTTTCTAGCTTTGTTCTA<br>CTGAGAAGCAAGTAGCAATCC     | 2.321 |

|     |               |               |                                                                   |       |
|-----|---------------|---------------|-------------------------------------------------------------------|-------|
| 200 | A_55_P2005549 | Tnn           | GTTTTCTGTAACCAAGTCAGTGACCTTTGAAGTAACTT<br>AAATTCCTACTCAAGAAAAACAC | 2.317 |
| 201 | A_55_P2180944 | Tmco4         | AAGGACTGGGCCTTGGTAAGCATGGATTACATGAGGG<br>GGGACCAATAAACTGATTATC    | 2.313 |
| 202 | A_65_P04284   | Erap1         | ATGCAGAGTGCATTAGATCTGTATCAGAAATATCTCG<br>TTTTAAGATATACTTGTGAGTC   | 2.312 |
| 203 | A_52_P47126   | Maml3         | TTGCAGCATTCCAATCAGAGTGGAAATGGGCATCCCAC<br>ACAACCAATCCCAGGGACCCAGG | 2.311 |
| 204 | A_55_P2094963 | Gm10105       | CAAAGCCAGGGCCCAAACCTAAAAAGGTCCCTACAAA<br>GAAGGGAGAGAAGGTACCCAAGG  | 2.307 |
| 205 | A_55_P1956752 | Ska2l-ps      | TGCAACAGAGCCATTAAGTCTCACATGCCGGACTGAT<br>AAAAAGAATGTTAACGAGGAA    | 2.305 |
| 206 | A_52_P167278  | Mthfd1l       | CTTTGCAAGAGTGTGAACTAAAAGCTAATGCTCCGTC<br>TTTGAGATTTCTTTTCATCT     | 2.305 |
| 207 | A_55_P2011560 | 1810009J06Rik | CCATTTCTTTTCTTATGCCTGAAATGAGGTTGAAA<br>TAAATACATTTCTGCTGCTCT      | 2.303 |
| 208 | A_55_P2234164 | LOC100038760  | CCAAAAGTTCTCCACACCTGAGAAAACCTGGCTCCCAA<br>AATAAAGAACAGAGTTGTTAAA  | 2.299 |
| 209 | A_55_P2112355 |               | AGAAGAGCACTGGTTCCTTCTATAAAAGATTGTGGATC<br>TTCATATGGATAATTCTGCCAT  | 2.298 |
| 210 | A_51_P143805  | Tmem42        | ATAGTGCCTTGATTCTTGTGCACCAGGGAATATTGGAA<br>GACTCTGTGATCATGGGTTACA  | 2.297 |
| 211 | A_51_P389864  | B3gnt9-ps     | CTCATATTTCTCACTCCAGCTTCAAGGAAATCAACAG<br>CTCACATTTTAGTACAAACAGC   | 2.293 |
| 212 | A_55_P2184189 | Ncf2-rs       | GGAAATGTGGACTAACTTACCATTTCCCTATTTAAAT<br>GAACCTGTACACGACAAAAAA    | 2.293 |
| 213 | A_55_P2012146 | Veph1         | CTCTGCCATGATGGAAATATTTATCCTCTGAAACTGT<br>AAACCTCCAATAAACTCTTTC    | 2.291 |
| 214 | A_55_P2176025 | Gm4532        | TGCTCGGGGACAGGACCTAGAGACTGGGTACCAGAG<br>ACAAAGAGATGTAGAAACAGATAA  | 2.290 |
| 215 | A_55_P2174541 | Dtx3l         | GAAAGGGTTGGGCAAGGAGAGAGCTCGTTACACAA<br>TACCAAGTTGCCGACAACTTTAA    | 2.290 |
| 216 | A_55_P2002497 | Srcap         | GCCAAATCAAACCCGAGGCAAGAGCCGAAACTCACAG<br>TTCCTCAAAGCCTATGGCCAGGT  | 2.289 |
| 217 | A_55_P2156022 | Fam132b       | GGGGCTGGAGAACAGCAGCGAGCTTCCACCATCTCA<br>GTAAATGGTGTCTCTATCTACA    | 2.288 |
| 218 | A_55_P2162782 | Ahnak         | TCACCAGGGATTAATGTGGAAGCTCCTGATATTCATAT<br>GAAGGCTCCAAGTCAAGGTG    | 2.287 |
| 219 | A_55_P1992789 |               | TTGTTAGGGGGCTATTCAGAGCCACTAATTCTGAGGA<br>GTGTGTTTGTATCTGTCAGGTGT  | 2.286 |
| 220 | A_55_P1960053 | Hvcn1         | AAAGGAACTGAAATCTAGAGAGAAATAACCTTTCATTC<br>CAAGTAATAAACCTTTCCACC   | 2.285 |
| 221 | A_55_P2022870 |               | TGATCTCCTTGACAGATGTACCTCTTGATACCTATGTAA<br>GCCAAACACAAACAGGTTGAC  | 2.281 |
| 222 | A_51_P117581  | Cables1       | GTAAGACGCATGATTGGTGTCTTGTGGCTTTTGCAGCT<br>GGGACAAACTACATTTCAAGCT  | 2.281 |
| 223 | A_55_P2114863 | Mgll          | CTTTATGAAGGAGGGAGTATATTTTCTACACAGAGACT<br>GTGTGGAAATATCCTTTGAATT  | 2.278 |
| 224 | A_55_P2412859 | 5830468K08Rik | CAAACCAACCTTAGAAAGGCTACACACAATGGCTAC<br>AATATTTCTAAAATGATACCTTA   | 2.277 |
| 225 | A_55_P2205858 | Gm7455        | ATTACTTCCGAGACTTTAATAAGCTAAAGAATGTGGA<br>TGTGAAGAAGAGAATGTTTCGT   | 2.274 |
| 226 | A_51_P201982  | Angpt2        | ACCTATCTTGATGGCTTAGTTTTAATGGCTGGCTACTA<br>TTTACTATATGGCAAAAATGC   | 2.273 |
| 227 | A_55_P2113391 |               | TCAGAGCCCAAACCATCTCCAAACCTGTAAGTGCATA<br>TTGCTTTATAACAGTAAATAG    | 2.269 |
| 228 | A_55_P2201020 | AI790442      | AAAGAAAAAGAAAAGGAGAAAAGAAAAGAAAACAA<br>AAACCTAGTACCTTAGCAAAAAA    | 2.269 |

|     |               |               |                                                                   |       |
|-----|---------------|---------------|-------------------------------------------------------------------|-------|
| 229 | A_55_P2020461 | Hmgn2         | ACAAAACCAAGGTGAAGGACAAGCCACAAAGAAGAT<br>CTGCAAGGTTGTCTGCTAACCTG   | 2.267 |
| 230 | A_55_P2007356 | lqcg          | ATGTCCATCATCTGGATTTTAAAGACGTAAAGAAACCAA<br>CCAAACCAACCAACCAAC     | 2.266 |
| 231 | A_55_P2104422 | Inadl         | AATCTACTGAAGAATGCCTTCGGGCGCATTATCCTGCA<br>GGTATTTTCGATCAATGGAGAAC | 2.265 |
| 232 | A_52_P87843   | Aldh1a3       | GGGGATTTTGATCTTAAGTTCAGATTGTGTTCAGCA<br>ATGAAAAATAAAGTTGGACAC     | 2.265 |
| 233 | A_51_P501656  | Kdelc2        | AACAAGAAGAAACCAGTTTTAATTATGCGGGAATGAA<br>AGCTTTCATGACCAAAGGCACA   | 2.262 |
| 234 | A_55_P2023285 | A630075F10Rik | AAGCTCATCCGACTTTCGTCATGCTTACACATGTGTAT<br>CCTTTCCGGAATGGACGGAA    | 2.261 |
| 235 | A_55_P2062340 | LOC100044039  | CCTGGCTTGCGAGCATAAATGCAGGCAATACCGTGTA<br>CTTAATAATAATAATAAATCTTTA | 2.259 |
| 236 | A_65_P05872   |               | TCTGGGAGGATTCTGTATTGACTGTTACATTTCCCAA<br>CTGAAGGTACCCAGGTTCTCT    | 2.258 |
| 237 | A_52_P411430  | Gm5914        | AGACTCGCTTTGAATTCATGAGAAAGAAGAGTGTGAA<br>ACAAGAAGCAAAGATCGGGTTGG  | 2.257 |
| 238 | A_55_P2141866 | 9630025I21Rik | ACACTGTCTACTTTACAGAACACAAGTTTGTTCACTCT<br>CTAGAGAAACTGTTGAAGTAG   | 2.257 |
| 239 | A_55_P2094964 | Gm10105       | AAATCAAGGTGAAGGACAAGCCACAGAGAAGATCTTC<br>AAGGTTGTCTGCTAAACCTGCTC  | 2.256 |
| 240 | A_55_P1981291 | Spink8        | GGAGTGTTAAAAGAGAACAGCACCTTGAGAAAAACAT<br>CTTGATATTAGAAGATACTTGA   | 2.251 |
| 241 | A_55_P1978050 | Aven          | TGCTTACAGCAGCCAACACCTACCTCTGTGTTTGATGG<br>CATCTGAATATATGTATGAGGC  | 2.248 |
| 242 | A_52_P274496  | Tspan18       | TTGGAATTTGTAATGTCCCTTGCAAGTAGGAAACAGA<br>GCTAATTTATCATTGTATCTCCC  | 2.247 |
| 243 | A_55_P2160421 | Gm8619        | CTTCTTTAAACAGTCTCTTGTAACCATAACTGAAACT<br>ATCTTGAAGCCTGAATACTCC    | 2.245 |
| 244 | A_55_P2168497 | Slc9a1        | GGACAAGGAGGAAGAGATCCGCAAATCTTGAGGAG<br>CAATCTGCAGAAAACCCGGCAACG   | 2.244 |
| 245 | A_55_P2018697 | Ldhd          | AACTGAAGCACCTTCTCAAGCTGTTATGGTGACAAT<br>AGAAATACAGATGAACCTAACCT   | 2.243 |
| 246 | A_52_P81693   | LOC100044247  | TCAGAGACCTTCTCAGCCAGGAAACCATCAACCACCCC<br>AGCATGGAAACAATGAACAGCC  | 2.240 |
| 247 | A_52_P680751  | Cux1          | ATATCAGCAGAAGCCATACCCATCACAAAAACCATCG<br>AGGAACTTGCCACACAACCTCAA  | 2.237 |
| 248 | A_55_P1993789 | Hmgn2         | GAGCACTGGTTCCTTTTATAAAGGATTGTGGATCTTCA<br>GATTGATAATTCTGCCAAAAG   | 2.237 |
| 249 | A_51_P164393  | Txndc2        | AAGACATCATCCAATCCAAGAAAGAGGACAGGCCCAA<br>GTCCTCAGAAGACATCATCCAAT  | 2.236 |
| 250 | A_51_P358906  | U2af2         | CCTCTTGAAGAAGATGGGCGAGGAGTGACAGCCGA<br>ATGACAGCCGGCAGCAACTGGAAT   | 2.230 |
| 251 | A_55_P2196037 | A630031M23Rik | ATAAGAGACGCAAGTCACACAGACACAGTATACTC<br>TCACATAGACACGTCCACATACG    | 2.230 |
| 252 | A_55_P1975315 | Crygs         | TCTGCTGTCTGGCTTGGTCCAAATAGACAACGTAAA<br>TAAAAGCATTGGAATGCATCCC    | 2.229 |
| 253 | A_55_P2109877 | Gm4718        | TGAGCTTGGGGCTTAAATCATTTAGGGTACAGATGATT<br>TTAAGTTGTTTCAGCATAACGC  | 2.228 |
| 254 | A_65_P15245   | Nrp2          | GGTTTCTGTGGCTGTCATTGTCATCTCCAGGTACCTA<br>GACAAATAGAGACCATTGGGAA   | 2.228 |
| 255 | A_66_P100586  |               | ATGTAATAAAATGGGATTAGAGTAGACCAATTGGCAA<br>ACCCTGGAACCCAGTGAGAGATT  | 2.226 |
| 256 | A_55_P1989738 | 4930426L09Rik | CTCTCCTGTGTTGGAATAAGCATTATATTGTTGTTA<br>ACCAGTTGGGAGTTCAATTAT     | 2.226 |
| 257 | A_51_P210143  | Syne2         | GCAAGTGCCAAGTGGGAGCCGCTCCGTCATGAAATTT<br>CTTGTATCTCCAACAACTAAAA   | 2.219 |

|     |               |               |                                                                   |       |
|-----|---------------|---------------|-------------------------------------------------------------------|-------|
| 258 | A_55_P2214408 | A130049A11Rik | TGGGAGGTGGGGAAATCGGATCTTGGGAAGACAAGAA<br>AAACAAAATAAACTTTTTGCGTC  | 2.214 |
| 259 | A_55_P2114188 | Gm5105        | GTGCACACTCACATACCCTGACCCAGGCACATGTAAAT<br>ATACAATAAAAATAAAATGTA   | 2.214 |
| 260 | A_55_P1960157 | Bcat1         | GAGCAGGACACTTTGTTCTTTTGCTGGTGAGGTTCTT<br>TTGTTTTTGTGGTTGTTT       | 2.213 |
| 261 | A_55_P2065958 | Gm3119        | AAGAAGTCAAGAAGTCTCTGGGCTACTTACCCTTCAAC<br>TCCATGTGTACTAGTGATGGC   | 2.210 |
| 262 | A_51_P314107  | Gsdma         | CTAAGCCCATCTCTGATGCTTAAATCCTGAAGATACA<br>GAATCATCAAACCCTTACTAC    | 2.209 |
| 263 | A_55_P2114143 | LOC100044698  | CAGATGTGGTTAAAGGGCTTCTGCCTTTTTGTGACACA<br>ATAAATTATAAACCTGGAAAGA  | 2.209 |
| 264 | A_51_P233797  | Adh7          | CAGATGTGGCATGTAGAGATGTAGAAAATGAATTTTT<br>CAAGAAATGACCATCAAACCAC   | 2.206 |
| 265 | A_55_P2148961 |               | CAGGTGGTGACAGACATACAAGCCTGCAAAGCACCC<br>ATACACGTAATAATATATAATT    | 2.205 |
| 266 | A_66_P117254  |               | GTGACAGCCAAGCTTTGGAGGCATTGATGTCCCCTG<br>GAATATCCCTGCAGCAAGGCTT    | 2.204 |
| 267 | A_55_P1959525 | Wbscr25       | AGAATGCCAGGCTTGCCACACAAGGCACAGGACACCA<br>AACACAACACACCAGGCACAACA  | 2.196 |
| 268 | A_55_P1998912 | Txnrd2        | GCCCAGTTTTGAACCCTGGCATTCTAGAGCACTAAT<br>AAAGAGGATGTTTTACTAAAGC    | 2.196 |
| 269 | A_55_P2102998 | Gm3893        | AGTAAAGAAAATGTTGAAAGGGGTCTGCCTCAAGCCA<br>AGAGCCCCACCAAGAAAATAAG   | 2.193 |
| 270 | A_52_P507498  | Plxnc1        | GGATCCCATTAGCCAAATGCACAGAATGTCAAATTAG<br>ATGTGTGCTGAAGACAATCAGT   | 2.193 |
| 271 | A_55_P2094792 | Pcdhga10      | AATGATAACAGTCTGAGGTGACCATCACATCTCTCTT<br>CAGTCCAGTGACAGAAGATTCG   | 2.193 |
| 272 | A_66_P105526  | Mamld1        | AAGTCACATGGGTCATCAACTCTGAAGAAGCAGCAAA<br>TCAACACCGGCCTTCCATTTCCC  | 2.192 |
| 273 | A_51_P168613  | Nuak1         | CCAGCTGATTGTGTCTGTTTAGTATTTCCCACCATGCA<br>GTTGACTCCATTAGGAAAACCA  | 2.192 |
| 274 | A_55_P2157507 | Gm3709        | ACCAAGCCTCACAGGATCTACAACACCAGTCTCAAATA<br>TCTTAGATTTTTCAGCAAAAAA  | 2.191 |
| 275 | A_55_P2140449 | B3galt4       | AATGCAGGAAGCTTGAAGCTGGTGAGCGGCATGAA<br>TGGGGAGAGGACTGCACCCTTTTG   | 2.188 |
| 276 | A_55_P2046328 | Gm6225        | CAACATTCTTAGCCATCAGGGAAATGCAATCAGAAC<br>AACTTTGAGATTCTATAGCCAAG   | 2.186 |
| 277 | A_55_P2010364 | Gm5116        | ATGAAGAACTCGATGACATTGATGTACCAAAGTCC<br>GTACCCTAACAAAGCCTGACAGA    | 2.185 |
| 278 | A_55_P2102540 | Olfml3        | TTAGACGGCACCCAGAACGACACGGCTTTTGTCTTCCC<br>AAGGCTGCGTGACTTCACCCTT  | 2.185 |
| 279 | A_55_P2034033 | Il12rb1       | AGTTTTCCCTATTAGAGTATTGGGCACTTAATAAATGGG<br>CCTTCCCAGAGACTGAGAAACT | 2.180 |
| 280 | A_55_P2144461 | Suv420h1      | GAGGTGGACGACTACAGTCAATATGAGGAGGACAGC<br>ACAGATGAATCCTCATCTTCTGAG  | 2.178 |
| 281 | A_55_P1995354 | Btnl2         | CACACATGTGGTACACAGACATAGATGTAGGCAAAAC<br>ACCCATACATCTAAAATAAAAAT  | 2.175 |
| 282 | A_55_P2084617 | Fam78a        | ATTTTGAGTTTTGAGATTAGATTGAGCGCTCTGACTG<br>GGTCTGCAACCTCCATCCTTT    | 2.175 |
| 283 | A_55_P2013928 | Dhrs13        | TAGGTAGTGAATTTACCCCATTTTTATGGAGGCGGAA<br>TTGGGAAAGGACTAAGTCAGGG   | 2.174 |
| 284 | A_55_P2104909 | Pisd-ps2      | CCAGAAAGCTGTATTGAGTGCACAGAGGAAAAAGAA<br>ATCAGAAAGCAGTCACTACAAGC   | 2.169 |
| 285 | A_66_P139618  | Stfa2         | ATCCCTAACCCCATTTGTAAGAGATGCGGCCATCAA<br>TAAAGAAGCATTTTTGAAATAA    | 2.168 |
| 286 | A_55_P2072631 | Prr5l         | CTCTGCAGAAACTCACAACCTAACTCCTTCTGGTTGT<br>CTGTTTTCAAAATAGATACAA    | 2.166 |

|     |               |               |                                                                   |       |
|-----|---------------|---------------|-------------------------------------------------------------------|-------|
| 287 | A_55_P2233462 | 2700022O18Rik | AATTAGACTCCATTTCCACAACAAAAGGAGACAACCCT<br>AACTTACAACCAGCCATTAAGC  | 2.166 |
| 288 | A_55_P2107502 | Fat1          | CAATGGTCTTGTAAAGGTTTTACTGAAAATATCATT<br>AGCCAGCCTTTCTACTGACAA     | 2.166 |
| 289 | A_51_P279247  | 4930403N07Rik | TGAAGTAAATTTCTAACCAACAAAATAAGTGAGCTG<br>AAGAGCATGAATGAAGTTCTGGG   | 2.161 |
| 290 | A_52_P399095  | 9030224M15Rik | TTCTGAAGAAGGACCTTTCAACGCTAGCAGCTGTTA<br>TACCTTGAGTTGGGTGAATACA    | 2.160 |
| 291 | A_66_P105244  | Tor1aip1      | CCATTAAGAAGCCCAAGACTTGACTCAACATACCAAC<br>AAATGGAAATACTAAAACGAAT   | 2.160 |
| 292 | A_55_P1998995 | Spep          | TCCTGGCTGCTGAACGGGGCGATGCTGGTTTCTACAC<br>ATGCAAGGCGGTCAACGAATATG  | 2.159 |
| 293 | A_51_P160824  | Cspg4         | CTGACCCAGAACTATTGCAGTTTTGCCGGACACCCAAT<br>CCTGCCCTCAGGAATGGCCAGT  | 2.158 |
| 294 | A_55_P2085165 | Gm5951        | ATGTGGCTCCACTTCGAGGATTCATAGAAACAGCTGTT<br>GTATTCAAGAAAACGGGGTGC   | 2.157 |
| 295 | A_55_P2369191 | Ggta1         | GTCAAGGTAGCTTGGCAGACAAAAGAGTATAATTTGG<br>TTAGAAATAATGTCTGACTTCAA  | 2.156 |
| 296 | A_52_P298548  | Nbn           | GCTTTCTCCAATGAAATTTCTGTTGCAAATAAAAATA<br>AGGATTGGACTTCTCAGCAGCA   | 2.153 |
| 297 | A_52_P304128  | Mmp14         | GGACAGCGAGTACCCTAAAAACATCAAAGTCTGGGAA<br>GGAATCCCTGAATCTCCAGGGG   | 2.152 |
| 298 | A_55_P2063316 | Mgll          | AATTAATAAGAAGCCAATGTGCACTACAGCTCACCGT<br>AATAAAAACCAGTCTTTGG      | 2.151 |
| 299 | A_55_P2262560 | 5730471H19Rik | ACTTGCCATAAAGATAAGAGGCATGCAAGAACAATCT<br>CTGGACAGGCCAGTTGAGATTG   | 2.151 |
| 300 | A_52_P339791  | Hdgp          | GGATTGATGAGATGCCTGAGGCTGCAGTGAAGTCAAC<br>AGCCAACAATACCAAGTCTTTT   | 2.150 |
| 301 | A_55_P2162136 | Hmgn2         | GCTGACGCCGGAAGGATGCGAATAATCCTGCAGAAA<br>ATGGAGATGCCAAAACAGACCAG   | 2.149 |
| 302 | A_55_P2011490 | Gm16510       | AGTAAGGATGCGAATGTTCTGCAGAAAATGGAGATG<br>CCAAAACAGACCAGGCACAGAAA   | 2.148 |
| 303 | A_55_P2389818 | A830035O19Rik | ATCCACTCCAGGGACTGTGCTCCTACGAATAAGAAATA<br>CAAATAAAATATGGGGACAGCG  | 2.147 |
| 304 | A_55_P2392972 | K230015D01Rik | CTTCTCCAATGATGGATTATGATCTGGAAGGGTAAGA<br>TGAAATAAACTTTTCTTCCC     | 2.146 |
| 305 | A_51_P386829  | Gm5577        | GTGAGCTAGTGCATATTTTCACTAAACTTTAATCTTT<br>GCTTGCACTTAAATGACGTGG    | 2.144 |
| 306 | A_55_P2152069 |               | TGCTCTGGATGAGGGAGAAGCAGGAAAGCAAAGAGC<br>TCTTAATAAAAAGAAATGCCCTCCA | 2.142 |
| 307 | A_52_P117393  | Tlr6          | TTATGAAGTTAGCCTTAGTCAATGAGGATGATGTGAA<br>AACTTGAACCTTGGGTTTCTAAC  | 2.142 |
| 308 | A_55_P2163428 | Foxm1         | TTGTCTGGACACAATGAATGATAGCCTCAGCAAGATC<br>CTTCTAGACATCAGTTCCCTG    | 2.140 |
| 309 | A_55_P2039289 | Hspb6         | ACATTTCCCATCTCCGAGGCCTTCTACCATCAGTCCC<br>CAATAAATGCACCTTGAGATTT   | 2.139 |
| 310 | A_51_P482611  | Dusp21        | TCCTACATCAAGATAAAAAACAATGACCTTGGACCTATG<br>GTTGGTTTAAAAACAGAAAGAG | 2.139 |
| 311 | A_55_P2005175 |               | CCTGGCCTAGCAAGTAGACAACATACTTAATATTTAAC<br>AGATATTTAATACAGAGACCTG  | 2.139 |
| 312 | A_55_P1954331 | Murc          | TTGGAGAAGCTTGAGATCTGAGGTGGTGTACAGAGTT<br>TGTGAGAACAAGACACACGACAA  | 2.137 |
| 313 | A_55_P2006210 | Fgf22         | GCTCTGCTTTTTGAGTAGGTGATTTTAAATAGCTTTC<br>CAGATAACACACATTTCCCTT    | 2.132 |
| 314 | A_55_P2045903 | LOC100044822  | GTTATGGTCAACATTATGGTCAACAGTCTGGCTATGGT<br>GGACAGCAACAAGCTATGGAC   | 2.130 |
| 315 | A_55_P2081432 | LOC635676     | GTCTTCGACGCATCTGGTTTGTGTTTGTGTTTGTGTTT<br>ACAGCTTCTTAATAAAATTG    | 2.130 |

|     |               |               |                                                                   |       |
|-----|---------------|---------------|-------------------------------------------------------------------|-------|
| 316 | A_55_P2019068 | Flii          | TATATGGGAAAAAGAACATCAAATTGGAGCCTGTGCC<br>CCTCAAAGGCTCCTACTAGATC   | 2.129 |
| 317 | A_51_P352381  | Dhrs4         | TTTCTTTGGAAATCTAATGGATGTCACAGAGGAGGTGT<br>GGGACAAGTTTTGAGCATTAA   | 2.129 |
| 318 | A_66_P111714  | Utp20         | TTGAAGAAACATAAAAATAAGAGTGAAGCAAAGAAG<br>AGGAAGATAGAGTTCTCTGCGCCCC | 2.126 |
| 319 | A_55_P1958876 | 4833422C13Rik | GACCACCAAATAGATTCTACCAGAAAAGAAAATCCTCC<br>CACCACATAATAATTAACAC    | 2.125 |
| 320 | A_55_P2167070 | Kif5a         | TCAAAACCAACAGAAACATTTGCTAAAAAGCCCAAAT<br>CTCATTATAGCCAACCCTGAC    | 2.122 |
| 321 | A_55_P2169188 | Ccdc23        | GCCTTCTCATCTGCTGCTCACCCGGGGTTGGTAGGGAA<br>ATGGCCAGGAAATGACTACTGT  | 2.117 |
| 322 | A_51_P112762  | Slc5a3        | GAAGAGACTCCACAAGTAAAGTGATCCTAACATTG<br>GACTTTTTGCTGTGTGTTCACTT    | 2.115 |
| 323 | A_55_P1965876 | Opn1mw        | CATCAAAGCTTTGGCCATGTTTTACCTCCCTTCTCATCT<br>ATCCTTGTAATAATAACATAA  | 2.113 |
| 324 | A_52_P657123  | Gm10270       | TGGTAAGGATGCAAATAATCCTGCAGAAAATAGAGAT<br>GCCAAAACAGACCAGACACAGAA  | 2.112 |
| 325 | A_55_P2140162 | Gm14725       | ATGTTACCTTAGATATGGCCGGACGTTGTCTTCATACG<br>ACCCATGCAGATACATCCTGAA  | 2.111 |
| 326 | A_55_P1996742 | Rbm14         | TATGGGGCTCAAGCATCTATTGGCCTGTCAGGCTCATA<br>TGGAGCTCAGTCTGCTGCTGCG  | 2.110 |
| 327 | A_55_P1958906 | Col17a1       | GGCACAGTTGGTTTTTATTAAGCACTTCCACTGTCTA<br>AAAACATTTGTATGTAACCTG    | 2.108 |
| 328 | A_51_P207330  | Tgm6          | TTTCTGAAGCCATAAGACAAAGCAGAAACAAGTTGA<br>GAACCAAGTGGTCCCCAACTCA    | 2.107 |
| 329 | A_55_P2246235 | Tpm3          | AAGAAGCTGAAAGGGACAGAGGATGAGCTGGACAAG<br>TATTCGGAAGCTTTAAAGGATGCT  | 2.107 |
| 330 | A_52_P257502  | Igfbp4        | GAGAAGAGAAACCTCATTCTGGAGTGAGAGAGAAA<br>GAAAGTGGTGAACATTGAACGCC    | 2.105 |
| 331 | A_55_P1954985 | Foxn3         | CCAGTACCTGGCCTTCAAAGGTGACATTTTCAAGCTAA<br>GGTTAAAAAACAAAAACAAAA   | 2.103 |
| 332 | A_52_P502267  | Epc2          | TAATGGGATCATGAGCATGAAATGGGATCCTGCATCA<br>CTTGTTTTAACTATTTATTTGTC  | 2.103 |
| 333 | A_55_P2013143 | Esrp2         | ATGGTGTGACAGCCAGAAAACCTTCCATCTGTCTTTGG<br>CCCTCAAATACTGAGTTTGAAG  | 2.102 |
| 334 | A_55_P2176894 | Gm2181        | AAAGAAAGAAAGAAAGAGAGAAAACCTGGAATATCA<br>ATCAACCAACCAACAATCAATCA   | 2.102 |
| 335 | A_55_P1965338 | Anxa8         | GTATACCGCCACCTAGCATTACCTCTGAGCAAACGG<br>AAACATCAACATGAAGAAAGAA    | 2.101 |
| 336 | A_55_P2157423 | Gm8784        | ATTGTAGAGGACGTATGAGACGAGTGACGCAAGTATG<br>GGCTGTCAAATCCATTGACATT   | 2.097 |
| 337 | A_55_P2056493 |               | TTGGGTGTGGCCGTCATTGGCATCGATGAGGGGCGAGT<br>TTGTAAGTCAGCCTGCAGCATAA | 2.096 |
| 338 | A_51_P207622  | Fmod          | GGCAAGCGTGGTTTTCAAACATGAGAAAGAGCCTCT<br>GCTCATCCTTTGGTCTAGTATGA   | 2.096 |
| 339 | A_52_P681557  |               | AGGGAGTCTAATGTAGACATGGAGACCTGATAAGGTT<br>TTAGATAATTTTGAAGTATCTG   | 2.092 |
| 340 | A_51_P430259  | 1700009P17Rik | TTTTAGAGACTGACCGAAATAGGTGAGACCCTGCCTGT<br>ATTCAGAAATGTGGAACAGAGA  | 2.089 |
| 341 | A_51_P451458  | Mamdc2        | ATGCAGTGTTTTATGGTAACAATTATTCTGGAAATAAG<br>GTCGCCCATGGAGCCCCAGGA   | 2.089 |
| 342 | A_51_P342926  | Omd           | TAAAGATCAGAAGCTGCGTTTAAAGATGTTGGTAAAAAT<br>GGCTTACTTCATAAGCTTAGAG | 2.088 |
| 343 | A_55_P2026214 | Gm5899        | GATGCGAATAATCCTGCAGAAAATGGAGATGGCAAAA<br>CAGACCAGGCACAGAAAGCATAA  | 2.087 |
| 344 | A_55_P2000280 | Mthfd1l       | ACAGAAACGGAGCAAGTTAAAGGCTTGTCTAATGGA<br>ATGAAACCCACAGGACTGGGCAA   | 2.086 |

|     |               |               |                                                                   |       |
|-----|---------------|---------------|-------------------------------------------------------------------|-------|
| 345 | A_55_P2168014 | Prmt7         | CACAGGCCTCTTGTCATGATGGCAGTTACTGCAGGG<br>GCTGACTTCTGCTATGCTATCGA   | 2.086 |
| 346 | A_51_P203653  | 4930417M19Rik | CATCTGGGAGAACAGCAGAGGCTACTATTTCCAGGCC<br>TTTCTCCCATGGAAACATTATAT  | 2.082 |
| 347 | A_55_P2133360 | Gm4608        | AAACGCAGACACGCTAAGGTTTAAACAGCATCCACCAA<br>GCATTACTAAAATCCACCCGGAA | 2.082 |
| 348 | A_51_P121179  | Fam132b       | TGTGTCATATTGCTAGGCAGAATATTTTATGTAATGG<br>ATCACACAAAGCCCTAACAAATG  | 2.081 |
| 349 | A_55_P2096762 | Arhgdig       | TTGTGACTTCAGTGAGGAAGCACCAAGAGGAGCATT<br>GGCAGCTGGCCTCTACGTGGTCA   | 2.080 |
| 350 | A_55_P2044982 | Zfp74         | TGGAAGCTTTTCAGCCAAAAGTCACACCTTGCAGAC<br>ACCAGAGAATCCACTACTA       | 2.080 |
| 351 | A_52_P286002  | Obsl1         | ATGAACGTGCCTACTTTCACAGTTACCATCACAGATGTC<br>TTCTCGTGATCGTCTACCCCA  | 2.080 |
| 352 | A_55_P2031636 | Igf1          | AGAAATGTAATGGAATAAGAGGTCAGCTGACCATCC<br>ACCTGCTTCCCAAGAAGGATACA   | 2.080 |
| 353 | A_55_P2028496 | Hmgn2l6       | TCAGGGTCGGCTTGTAAGCTGTTAAAACAACATC<br>CTTAATGTGAAATGCAACTCTC      | 2.080 |
| 354 | A_52_P410685  | Krt7          | CAGCATCGCAGAGGCTGAGGAACAAGGGGAGCTGGC<br>AATCAAGGATGCTCATGCTAAGCA  | 2.069 |
| 355 | A_51_P281593  | Ppapdc1b      | GAAAATAAATGCAACACTTTCTGCCTTTGTTCAAAG<br>AAATAAATGGCGCAACTAGAGG    | 2.068 |
| 356 | A_55_P1983558 | Tmed1         | TCAAGGAACAGAGGGCATTGTCTGGGCACTGGAGT<br>CAATAAATTATGGTCAGAAAGTT    | 2.067 |
| 357 | A_55_P1962224 | Afap1l2       | GGCATTATTTCTGTATCATAAACACTTGGTGACCTTT<br>ATCAAGTGGTGAGTTAGAATT    | 2.066 |
| 358 | A_52_P132761  | Stat6         | CTAATTTCCAAGATGTCCCAAGAAAAGTCAACGGCT<br>CTATGTTGACTTTCCACAACGC    | 2.065 |
| 359 | A_51_P449995  | C6            | TTGTCTGGACATCAAGGTATACATGCAAGGAAGACTC<br>CTGGACACCTCCCATTTCAAATT  | 2.064 |
| 360 | A_51_P245275  | H2afx         | CTGTCTGGACTGAGCCTCTGGCTTCTGAACTGGAACCT<br>TTGCAGCTATTACAAGTTTACA  | 2.063 |
| 361 | A_55_P2037702 | Gm10638       | AGAGTTTTCTGGACTTCCCGGGGAGACCTTTTATCCA<br>AAATAAATGAAGACCTCATCTC   | 2.062 |
| 362 | A_51_P167292  | Chi3l3        | TGAACATCTTTTCTTCTGTAACCACCATGCTTGTT<br>TCTTGCTCTACAATAAATTC       | 2.060 |
| 363 | A_55_P1989524 | Fndc1         | ACTCAGACCTCGTCAGTGACCCATCTGCCATTGAGAA<br>CTTGAAGCCAAACACAAGGTAT   | 2.059 |
| 364 | A_55_P1997696 | Plbd1         | GATGACAGAAAGCTGCGAATAGGACACCAAAGGCACT<br>CTTAGCTGTATTTCCCATCTGT   | 2.055 |
| 365 | A_51_P475342  | Chrnbl        | CTCCAAGTGATTTTCTTTCCCTAAACTTAACAGGTTTC<br>AGCCTGAATCATCTGCCCGG    | 2.053 |
| 366 | A_55_P1974441 | Pdgfb         | ACTCCAGGCTGCAGGCTTCTTCTGACTCAAGAACCTG<br>GAACAAGTGTGCAGGAGCCTTG   | 2.052 |
| 367 | A_55_P2347073 | Al662501      | TCCTATGATCTGCCAGAAACGGATGCTTCAAGTTACT<br>CTGACCTCGTTTAACTTCGAG    | 2.051 |
| 368 | A_55_P2344608 | D7Wsu130e     | GGCCTTCACTCTGAGCCATCTGTGAGCTGCCAAGCT<br>GAATTTTAAATAAAGCCATT      | 2.048 |
| 369 | A_55_P1978241 | Artn          | ATATATACATATACATTGTAGTCGCGTTGCTGGACC<br>AGCCTGTGCTGAAACCAGTCCC    | 2.048 |
| 370 | A_55_P1988058 | Tyw3          | AGATCAAAATGCCAAGCCCTTTGTATAACGATGTTTAG<br>GAATTTGAAGATAGCTACCACC  | 2.046 |
| 371 | A_65_P06446   | Tfrcl         | TCCTGCTAGATGGAACATAGATTCTTATGTAAGCTGG<br>AACTTTCACAGAATCAAATGT    | 2.043 |
| 372 | A_66_P128199  | Fzd5          | AATTTCACTGGCTTCCACAAGACCTGTACACCTAGAT<br>GCAGGACTCTGTGAAGGTCTTA   | 2.043 |
| 373 | A_55_P2007708 | Nanog         | CCATGATGAACCGATGCCAGCTGGACTAGTTTAAACA<br>AAATAAAACTAATTTTACCTT    | 2.042 |



|     |               |               |                                                                   |       |
|-----|---------------|---------------|-------------------------------------------------------------------|-------|
| 374 | A_55_P2148323 | 2810021J22Rik | AAAGAATGTAGCAAAGCATTTAGTGTCAAGTCCTATCT<br>CACTATCCATCAGAAAACCTCAC | 2.041 |
| 375 | A_51_P225793  | Prr5l         | TAAATGGTGCCTTACCGTCACTCCAGTTTCAGGAACCA<br>GCCACATTTCTGGTGTGTATAT  | 2.039 |
| 376 | A_55_P1979863 | Syne2         | CAGGGGTTGGTAAAGAAAAGTGGAACTATTTGTGATA<br>TGCAACTCAGATGTTTCTCATT   | 2.039 |
| 377 | A_55_P2029046 | Fgd3          | TGTGAGGTTTCAGACGAGTTCTCTGTGGGCAGGTGC<br>CATGCTTATCTGCATAAATAAAT   | 2.038 |
| 378 | A_55_P2124331 | LOC640017     | AGAAGAAAAGAAAAGCTCTCACCGATACATCTTCGAC<br>CCTCCAAGTACCTCAATTTCAA   | 2.035 |
| 379 | A_55_P2384593 | Gpc6          | GCATTCTCTTAACATAACAACCTCACAAACAAACAAGTC<br>AAGACAAAAAGAGAGAGAGGAT | 2.031 |
| 380 | A_55_P2200029 | Dleu2         | TTTCAGGTTTTGTAACAGTTTCAGTAGTTAAAAGCACTT<br>GTGGGCTGGAGAGACACCTCGG | 2.030 |
| 381 | A_66_P132997  | Ccdc15        | CGCAACTCTCGAAATGCCATTTCGTAATTTTGCTTCTGC<br>ACATAGACGGACTCCAAAACA  | 2.029 |
| 382 | A_52_P630632  | Rcvtb2        | GTATCCTGTGTTCCGAGCTTTCCTGGAGTATCTATACA<br>CAGATAACATCAGCCTATCTCC  | 2.029 |
| 383 | A_51_P227345  | Dpep1         | AGCTCAGGGAAGACTGGACAAGCCCAGAGTTCTGTGTT<br>GTCCGTGCAGAACCACACCCTTT | 2.029 |
| 384 | A_52_P152631  | Tmem17        | ATGTATGGCACTTCAGACGAAATTGCTTTGTTTCAGTGG<br>AATCTCACCAAGTGTGACAACA | 2.029 |
| 385 | A_52_P233305  | Adamts12      | GCTCTCAGAAAAGAACCATTTCATTGCATCCCTCAGAA<br>AACAGTACAACCTGAAGATCAAG | 2.028 |
| 386 | A_51_P389636  | Kcnn4         | GCCACATAGCTCCACATGAACTCACAGAAGAACCAGG<br>CTAAGTACCAAGGACCGAGCTC   | 2.028 |
| 387 | A_51_P332003  | Aste1         | TGAAGTGAAGAATTGATACAAATATCAAACATCAC<br>CTGTTTATGCAAAGCAACTGCTC    | 2.026 |
| 388 | A_55_P1966332 | Plac9         | GAACTGGCTTCAAACCTTCCCACAGGGCCCTTCAGCCC<br>CAAACCTGACTTGCTTGAGAT   | 2.026 |
| 389 | A_52_P586141  | Adcy7         | ACACTTCTGACAAAGTGATTGTTACTGTGTACTTCATA<br>GATGACAGGTCAATGCTCCGA   | 2.026 |
| 390 | A_52_P499299  |               | TAACTCAGCAATTACGAATGTTTGCTTTCAAACATCCTT<br>AAGAACAGGATGTCCTAACGA  | 2.025 |
| 391 | A_55_P2120308 | Cacna1a       | GTCTGCTTGAATAACAAAAGAAAAAGAAAAAATT<br>ACCACCATCACTGATTCCTTGC      | 2.023 |
| 392 | A_51_P191782  | Olfml3        | TAAAGGACAACCAATTCTCAAGCCCCTGTGTTTATG<br>CAGAACTCCAGATCCTGGGTAG    | 2.022 |
| 393 | A_55_P1973941 | Slc7a5        | GTGGTTATAATGTCTTTTACTATTGTATTAATGGCTAGC<br>CTGTTACATTAGACTGGGGGG  | 2.021 |
| 394 | A_66_P140856  | Gm4588        | CGACTTTGCAATGAAAAAGCTGAAGAGGCAAAGAAA<br>GACAAATCCAGATCGGAGAGTGAG  | 2.019 |
| 395 | A_51_P198137  | Ubxn8         | GTCTTACTTGACTGGATGATGAAAGTTGGGTACCACAA<br>ATCCCTATATAGACTTTCCACT  | 2.018 |
| 396 | A_55_P2030771 | Fnbp1         | TACTCCTTAATCCTGCAGAGATTCAACCAGGAGCAATG<br>GGAATACTACCATACCCACATC  | 2.018 |
| 397 | A_55_P1962429 | Maf           | GAACAAGCCTTGGTTTACATTAGAATAACGTTATGATT<br>ACAGTATTGAGCTCCACCCCCC  | 2.015 |
| 398 | A_55_P2378486 | Kcnma1        | TGGGTGGGCAGTCAATGTATACATGTAAATCAAAG<br>TCCTGTGAGTGAAGTATTTTTT     | 2.013 |
| 399 | A_55_P1960298 | Tmem80        | GCAGCCTTTGTAGATGCCAAATGAATCTCATCTCCTGT<br>TTTTCTTTTCTAGCCATTTT    | 2.008 |
| 400 | A_55_P1966104 | Il17d         | GCGAACTCCAGCATGGACAAGCTGCTGCTGGGGCCCG<br>CCGACAGGCCTGCGGGGCGCTGA  | 2.007 |
| 401 | A_55_P2383877 | 2810040C05Rik | CATATACAAGACGGGGCAATCCAAAACAGCATAATAT<br>AATTTTCTCCAACCTTGAGAA    | 2.007 |
| 402 | A_55_P2133220 | E130306D19Rik | CTACCTCTATGTTCTATAATTTATTTCCCACTGGATCT<br>TAATAAAGGTTGTTTTTGC     | 2.007 |

|     |               |               |                                                                  |       |
|-----|---------------|---------------|------------------------------------------------------------------|-------|
| 403 | A_55_P2144456 | Suv420h1      | CCCTCTTGCTCTGAGGGTTTGTGTGTTTCATGTGTATA<br>CATGTAATTA AAAAGAAAATA | 2.006 |
| 404 | A_51_P162116  | Mblac1        | ACACAGTCAAGACAAGCAATATTTGTCACGTGCAGCTT<br>TCTAGGAGGCAGCTTCAAACA  | 2.006 |
| 405 | A_51_P256945  | Opa3          | GAGCCTTTATTACATCTCTGAAGACCCTTTTCTAAATG<br>GAGACACACAGGCCCCAGGAT  | 2.006 |
| 406 | A_55_P2071970 | Nav2          | ACACTGAAAATACTTCATGGGAAAGGATCCTCACTGTT<br>GAAATATAAAGGGTTAAATGG  | 2.003 |
| 407 | A_55_P2110703 |               | ATGGTTAAACATTCATGACATAGGAATACAGACCACTG<br>ACCACCTGTGACCACCTAGCAC | 2.002 |
| 408 | A_55_P2111825 | 1700001C02Rik | CCCAGGGAACCTTGGCCTGACCAGGCTGGCTTGCTTG<br>TAATAAAATCTTCAGCCACAACC | 2.002 |
| 409 | A_52_P560146  | Gm22          | CCCCCAGGTTGTACTGTAAAAGCTACAGCTAATTTGT<br>CTTTCAAATATATCCCACTA    | 2.001 |
| 410 | A_52_P593037  | Acsl5         | GCAGCCAAGATCGGGGTAAAGGGATCATTTGAAGAAC<br>TGTGCAAAAACCAATGTGTAAAG | 2.001 |

**Table S2****a) Up regulated genes in  $\delta$ -treated MEF**

| No | ProbeName     | Gene Symbol   | Sequence                                                          | Fold change<br>[ $\sigma$ ] vs<br>[DMSO] |
|----|---------------|---------------|-------------------------------------------------------------------|------------------------------------------|
| 1  | A_51_P413376  | Zfp42         | TGTGCTATTGAAGGGGATGGGGACTTTTGCATA<br>CGGCAGAAAATCAGTTATTTTAACTA   | 488.161                                  |
| 2  | A_55_P2042297 | Gm5250        | GGATCCTTGCTGTGCATTCTGATGTGAATACCAG<br>GTTACTACTCTAAATAAACATAAAA   | 155.015                                  |
| 3  | A_55_P2067947 | Dppa5b        | TTCATTTACGGCTATCAAAGCATCAAGGTTCCGGG<br>CTAAATGGTTGCTTCAGTCCATGGCT | 123.400                                  |
| 4  | A_55_P2003483 | Gldc          | CACTAATGTGCTGATCTGTCACAGCATAAGTGT<br>CCTCCTTTCAGTGTGCGGACTTTTTT   | 122.181                                  |
| 5  | A_55_P2028171 | Dppa5a        | CTGCGCATTCTGATGTGAATCCCAAGGTTACCAC<br>TCTAAATAAAAAATAAAATTGAAGTG  | 94.802                                   |
| 6  | A_51_P143712  | Tdh           | CACAAAGGCCAGAGAAATGAAGTCTGAGTGGT<br>GGTGGCTATCTCTCGGGATCTGCAGCA   | 78.498                                   |
| 7  | A_66_P114804  | Gm7325        | TGAGTACTTTCAAAGCTTGGTACGCAGCAGGTA<br>GTCAATAAACGAGGACAGTGTGTTGTT  | 78.169                                   |
| 8  | A_52_P537571  | Trap1a        | TGTAGGATGATTTATTTCTCCACGACCCTAATTT<br>CCTGGTGTCTATACCAGTGAACCCT   | 69.488                                   |
| 9  | A_55_P1978571 | Otx2          | TTTCAGGGCTGTGTGGATTGTGCGACTGATTGTC<br>CTAGATGCACACTTTATTTAAAAA    | 58.380                                   |
| 10 | A_55_P1971006 | 1190003J15Rik | GAAGATATTCTAGCTGCCCTGGAGTTTCATAATG<br>GGAACTGTGACTTGGGTGTCAATAA   | 55.346                                   |
| 11 | A_51_P491635  | Ly6g6e        | TACCCGAGGGTCTCAAGAACAGAGGGCTACCTT<br>GGGAACCATAAAGAGTGTATTTAATA   | 54.093                                   |
| 12 | A_55_P2137701 | Gm13138       | CTGTCAACATCTCCTTCTCATTGCCTGTAAATA<br>AAGCTGAATATTTTAAACAAGGTAA    | 53.197                                   |
| 13 | A_55_P1960342 | Tcl1          | GTGTGGGATTTTATGTGGTTCTATTTTAGAGATA<br>CGGCTGGATTAATAAAGCTTTGTAG   | 52.202                                   |
| 14 | A_55_P2027127 | Triml2        | CCCAAGATCAAAGAGACACAAAAATAAGATCC<br>AGACTTTGTGAACACCACTTATGTAAT   | 51.429                                   |
| 15 | A_55_P2101526 | L1td1         | GAAGAGACTGCAGGCTGACTGACTCAACAAGAT<br>TACATTGCTTTATTATTTACTATTACA  | 46.675                                   |
| 16 | A_51_P508580  | Tcf15         | CCATCCAGGCCTAGCTGGCCAGGGACAAGGCAG<br>AAATTTTAGAAAACCAAAGACTATTTT  | 45.908                                   |
| 17 | A_55_P2071349 | Trh           | GGGGTCACATCTTGATATAACCCTGCTCTTGTTA<br>ATCTCAATGACAATAAAATATATCC   | 44.791                                   |
| 18 | A_55_P2084332 | Pigp          | TATCGAGGTCTTCATTTGCGGCTCTCAAACAAC<br>AAGGTTCCGGGCTAAATGGATGCTTCA  | 43.066                                   |
| 19 | A_51_P137336  | Cdh1          | ACATTCTAACGGGAAAAAGGAGACAAGACCTTT<br>GAGAGTTTTTCATTCAAATGCAAATCT  | 43.030                                   |
| 20 | A_52_P633300  | Morc1         | AACGAAAAGCTAAAAACGTGTTTCAACCAGATCC<br>AGAATATCTACATGGCTCAGTATGAG  | 42.882                                   |
| 21 | A_55_P2007708 | Nanog         | CCATGATGAACCGATGCCAGCTGGACTAGTTTAA<br>ACAAAATAAAACACTAATTTTACCTT  | 42.247                                   |
| 22 | A_55_P1984655 | Smtnl2        | TGCCATCTATCCCTTAGATATTGGCAAATATATT<br>ATGATAAAAAGTGGCCCAAAGTTGA   | 40.894                                   |

|    |               |               |                                                                  |        |
|----|---------------|---------------|------------------------------------------------------------------|--------|
| 23 | A_51_P269084  | Chchd10       | GCCTAACCCCTCACCGACAGCTTGATGGAAAGG<br>AGAGGTTCCATGTGACTGGGAGTAAGG | 36.728 |
| 24 | A_51_P514449  | Nr5a2         | ATGCAAAGACAGTGATTCTGCATATGGCCTGGA<br>AAGACAGGAAAGCCAGTCTCTACAAA  | 32.774 |
| 25 | A_51_P245533  | Tex19.1       | TGACCTCACTGTCATAGGGGTCATATGCTTACTG<br>TCTTAGGGTCAAGATACCTGATTTTA | 31.948 |
| 26 | A_51_P202340  | Pou5f1        | AAGTATTGAGTATTCCCAACGAGAAGAGTATGA<br>GGCTACAGGACACCTTTCCAGGGGGG  | 31.537 |
| 27 | A_66_P136102  | Lefty2        | AAGGGTGTACTGAGTCTTTCTGGCCATTGCCTG<br>GCAGCTTTGCCCATGTCATTTATTGT  | 31.310 |
| 28 | A_52_P175376  | Tcfcp2l1      | GTACCTGAAATAAAGCATATTTTGCACCTGTAAA<br>TGAAAAATCTGTATGTGGGCTCTGTG | 31.184 |
| 29 | A_65_P16753   | Bex1          | AAGGATAGGCCAGGAGTAATGGAGTCCAAAGA<br>TCAAGGCGTGAAAAATCTCAACATGGA  | 29.812 |
| 30 | A_55_P2065549 | Dppa4         | CCAATGCTAAGAAGTACGAGGCAGTGCCAGCCG<br>ATGCTTCGTCCTCATCAGAAGTCAAAG | 28.775 |
| 31 | A_55_P2150029 |               | AAGCCAGGCCGTGTTTGAGCTGAAGAATCTGGA<br>ATCTTCCAAACATACCGAGGTCTTAAT | 27.322 |
| 32 | A_52_P488501  | Gtsf1l        | GCGCCTACTGTCACCAATGTCGTCCTTAAGAG<br>TTTTGTTCCCAAAAACCTGTTTGTG    | 26.557 |
| 33 | A_51_P496720  | Dnmt3l        | ATGAAAGTCTTCTAGAACCCAGGGCAGATTTCT<br>TCCTAAGGTCTTCCCTCCACAGTT    | 26.057 |
| 34 | A_51_P494125  | Alpl          | CCTCTTTTGGTGTGGTTAAAAGGGAACACAAG<br>ACATTTAAATAAAAACATCCCAAATAT  | 25.370 |
| 35 | A_51_P376445  | Rhox5         | TGGAGTGAGATGGGGAGAAAGATGCCCTTTGC<br>GACACCGAGATTTTGATTTGATCACAT  | 25.214 |
| 36 | A_66_P137775  | A830035A12Rik | TCACATCAGGCAGGTGAGCCAAGCCATATTTGA<br>GCTGAAGAATCTGGAATCTTCTAAGA  | 23.447 |
| 37 | A_51_P324814  | Krt18         | GGATGGCAGAGTGGTGTCCGAGACTAATGACAC<br>CAGAGTTCTGAGGCACTGAGGCAGAGA | 23.403 |
| 38 | A_51_P368823  | Grb7          | CTGTACAGACTGAGAGGCCAGTTGATCTGCTCTG<br>TTTTATACCAGTAACAATAAAGATTA | 23.275 |
| 39 | A_51_P354706  | Lefty1        | CTTTCATGCAAATCTGAAGTGCTCATTATACTGG<br>GAGAGCTGGGGATTCTAACTCCCTAA | 22.788 |
| 40 | A_55_P2146254 | Ifitm1        | TGTGACACTCACAAATCTGTCCATGGTGGACTCA<br>ATAAAGTGACAGTGCTGTGACTTTCT | 21.932 |
| 41 | A_55_P2011877 | Eif2s3y       | CTGTGCACCACTGAACCTTACAGTAAAGAAAGTTT<br>TTCTTATGTTGAAGGATTGTTACTC | 21.524 |
| 42 | A_55_P2031021 | Bex1          | TTTTACTCGGCCTATAATTCTTTTGTAGCAGAA<br>TTTATCAATTGCATGGGAAGATCCG   | 20.487 |
| 43 | A_55_P2129498 | Gm5712        | AGATCAAGTATTGAGTATTCCCAACGAGAAAAGT<br>ATGAGGCTTCCGGGGATGCCTTCG   | 20.487 |
| 44 | A_55_P1983488 | Lsr           | GTCGGGAAAGTTTAGTCTGCTGATCCCACGTTTT<br>GTTATGTAGCTTTTATACTTTTTTAA | 20.401 |
| 45 | A_55_P2183147 | Tdgf1         | TGATGCTCACAGTGAATCCCTAATGTTACCCCTC<br>AAAACACTAACTAGGCCTTAGCTCTG | 19.822 |
| 46 | A_55_P2087265 | Gm7676        | ATGTGACACTCACAAATCTGTCCATGGTGGACTC<br>AATAAAGTGACAGTGCTGTGAAAAAA | 19.678 |
| 47 | A_52_P307739  | Sox2          | TGGCAATCAAATGTCCATTGTTTATAAGCTGAGA<br>ATTTGCCAATATTTTTCGAGGAAAGG | 19.630 |

|    |               |               |                                                                   |        |
|----|---------------|---------------|-------------------------------------------------------------------|--------|
| 48 | A_55_P1988368 | Upp1          | TTTCCGCCCCGAGAAGCCTCTGCAACTCTGGG<br>CAATAAATCTATTTTTTCATAACACA    | 19.213 |
| 49 | A_52_P270429  | 2200001115Rik | TGGAGAGAAGGCCATTAATGACGCCCTAAAGAA<br>AGCCCAAGAATCAGGAGACAGGGTGGT  | 18.750 |
| 50 | A_55_P1966749 | Cyp2s1        | TAGCTGACCTCTTTGTGACTTGAAGGTTCCCGTTT<br>TGCAATAAAAGTTTGTCTTGCCCC   | 18.626 |
| 51 | A_52_P648715  | Triml1        | AGAACCCGTGCATAAAGTTGGTGTGTTCTTGGAC<br>TATGACTCTGGACACATAGCCTTCTA  | 18.592 |
| 52 | A_55_P2015375 | Tuba3a        | TCTGGCTGGCGCCGTCCATTTATGTCTTCCCAC<br>CATTGGAAATAAAGGATATATTATT    | 18.349 |
| 53 | A_66_P118600  | Lama1         | ATGTTGAACTAAAGCCACACGGACAACAGATAC<br>CTCTATTAATGGTTTAAACGTCAGT    | 17.736 |
| 54 | A_66_P101192  | Dppa4         | ATAAGAACAAGATCTTGACTAAGAGCTCGAAG<br>GATAAAGGACAGATCTCTTGTGAGC     | 17.493 |
| 55 | A_52_P472302  | Fxyd6         | TTGGAACTAACCAAGCCACTGTGTACTGGGA<br>CTGCTGATCTCTGTCTTGATCTAT       | 17.170 |
| 56 | A_51_P109144  | Grtp1         | AAGCAGATCACCAAAGGGGACTTTGTGACAGAG<br>TGTCACGCATTCATGCAGAAAATCTTT  | 16.755 |
| 57 | A_55_P1998601 | Slc17a9       | CCTATTAGATTTTCTTATAGATGTGGTGAGTCTT<br>GCCAGAGCCTTATTTAAGTAAAAC    | 16.526 |
| 58 | A_51_P237668  | Bex2          | GTTTGTGATGTACTGTTGTAATTTCTGGTGCA<br>CTTGTTCCTCCATGGGGCTCCAAC      | 16.267 |
| 59 | A_51_P171999  | Apoe          | AAGATACAGGCCTCTGTGGCTACCAACCCCATCA<br>TCACCCAGTGGCCAGGAGAATCAA    | 16.066 |
| 60 | A_55_P2071691 | Kank3         | CTGGGTAATGCCATATCCCTCAACTCACTTCATG<br>AAACATCCTAATAAAAGTATTTCTAC  | 16.053 |
| 61 | A_55_P1960291 | Tjp3          | GCACTACCAGCGTGCCACAAGCCCTCAAGCTTC<br>TGACCACTTAATAAATCTTAAAAAA    | 15.674 |
| 62 | A_55_P2078960 | Tdh           | TTACACACTGCCTTTGTCTGTGCCTAAATTGGTC<br>CAAGCACAAAGGCCAGAGAAATGAA   | 15.644 |
| 63 | A_51_P417074  | Arhgap8       | AGACTGGAGATGCCCCCTTCAATCTAGGCATCT<br>GTGTACTGTTGTCTTATGAACTTA     | 15.404 |
| 64 | A_51_P346132  | Rhox9         | CACCAGTTCACCCACTCTCAGCTGCGTGATCTG<br>GAGCGCCTTTTCCAAGAGAATCGCTT   | 15.227 |
| 65 | A_51_P202050  | Dtx1          | TGAGGATTGGCTGCTGGGATGGAAGTCAGCCAA<br>GCTTTAAAGGGACGCCAGCAATTGCTC  | 15.136 |
| 66 | A_55_P2001628 | Rps4y2        | GGGGAAGGGCGTTTACGTTTGTATACTTAAA<br>AGTTTTTAAAGCAGCATGTTGAATTA     | 14.705 |
| 67 | A_55_P2169415 | Cgn           | CATGATTTAAAAGAAGATATTCTGCAGATCAGAT<br>ATTTTCTCCAATCCAGCCTTGTTTT   | 14.469 |
| 68 | A_66_P128079  | Gm5604        | CCATCCAAACCAATTGAGTTGATTTTCTAAAAT<br>AAAGCCTCAGCTGGCTGTGCAACT     | 14.005 |
| 69 | A_55_P2174601 | LOC100047292  | CTGTCTATTTTAACTAACTCCATATGCTGCCAGT<br>ATCAACTTCATGACATTTGCCAAAA   | 13.962 |
| 70 | A_55_P2129920 | Chd7          | GTCCTACTGTTTACACTCACAGTTAATGTTTCATAC<br>CTAGTTTTATAAGCTGTTCTGTAAC | 13.903 |
| 71 | A_55_P1953341 | Wfdc2         | CGATGAAAGCATCTCCTTTTTCTAACCAATAAAGT<br>GATCGCTTTCAGCAATGGAGAAGCT  | 13.226 |
| 72 | A_51_P244950  | Dpys          | CAACCCCTGGAGAAACACCTGCTATTTCAACTCC<br>CCAAGATCCTTAGGAAAAATCATTG   | 13.213 |

|    |               |               |                                                                  |        |
|----|---------------|---------------|------------------------------------------------------------------|--------|
| 73 | A_51_P359603  | Itgb7         | ATTTTTCAGAGTGACCTTCAGAGGGCAGCAGCCA<br>TTCCACCACACGAAGGGCTGGTCCT  | 13.198 |
| 74 | A_55_P1983733 | Aldh1l1       | AATCAGAAGTGGCTCCAAGTGGAGTGAGCAGTC<br>ATGTCCCCATGAATAAAAATTGTGAG  | 13.171 |
| 75 | A_51_P255657  | 2210011C24Rik | AACCACCTTTCTCCATAAAATTCTAGTCTTCCTT<br>GGAAACCTGCAAAACCTATGAGT    | 13.162 |
| 76 | A_51_P183894  | Fbxo15        | CGATGAATACTTCATTGTCAGACTGGACATTTAC<br>CTCAGTGTAGCAAAATTACAACAATG | 12.973 |
| 77 | A_55_P1979126 | Tuba3a        | CGGCCGTCCATTTATGTCTTCCCACCATTGGAA<br>ATAAAGGATATATTATTAATAATTCT  | 12.669 |
| 78 | A_55_P2032543 | Cblc          | AAGGGAGCCTTGGGGCTGGAAGGAGTGACAAA<br>GCAGAAATAAATTGAATCCTGATCTTTC | 12.273 |
| 79 | A_66_P112024  | Gm6816        | CTTTGCTACCCGCCTCTCCAACATCTTCATGATCT<br>GGAAGGGCAAAAAGCCGTGGATCTC | 12.077 |
| 80 | A_55_P2174582 | 1190003J15Rik | GGAGTTAAAGTATGTGTTACCTGAAGAAAGCC<br>ATCTATCTGCCTGTTTCTTCCAGAC    | 11.630 |
| 81 | A_55_P2092661 | Nup210        | CCGAGAGCTGTTAATGGAGTCTCCCTGCATTTG<br>TTTAATAAAGTTCTGTGTAGTTTCTT  | 11.325 |
| 82 | A_55_P2090070 | Myh14         | TCTGTGTGCTCATAGGGTAATGCTCATGGCCCCT<br>CATGCTCCAGACACTAAAGAAATAAA | 11.160 |
| 83 | A_55_P2096917 | Mreg          | CATGCTGTTTAAATTAGCCTGCAAATATTTTCAG<br>TCACTTCTGTGGGCTATTAGAAGAT  | 11.056 |
| 84 | A_55_P2151609 | Sorl1         | GTTGATGGTTTTATTTAAAGATGCACTTTGAGT<br>TGCAATATGTTATTTTATATGGGCC   | 10.934 |
| 85 | A_55_P2007703 | Nanogpd       | ACCCCAACAAGCCTTGAATTATTCCTGAACTACTC<br>TGTGACTCCACCAGGTGAAATATGA | 10.775 |
| 86 | A_52_P138806  | Dlgap3        | CCACACCTGTGGCTGTCCACATCCCTTTGAGTA<br>TCCCAGGAAAAATAAACCGCAGAA    | 10.726 |
| 87 | A_51_P282144  | Adam23        | TAATGACTACAGAGCCTCAGATCTGAGAATTGG<br>GATGGGGTACAAGACAAAGGTCCCTTT | 10.532 |
| 88 | A_55_P2086835 | Gm5514        | GGCTTGTGATGTTTGCCTAGGAGCTCCTGAT<br>CAAATAAAGTTAGCAATTGCAAAAAA    | 10.384 |
| 89 | A_55_P1954302 | Esrrb         | CATGCCCTGGGATTATCTCCATCCAGTCCCATGT<br>ATCTGAAATCTAATAAATAAGGAAA  | 10.299 |
| 90 | A_51_P103222  | Slc39a4       | CTCTGCTTACCTTCTTAAGCCACCTAATTGTTGG<br>CCCCACTACGGGTAGCCAGAGGCTT  | 10.274 |
| 91 | A_55_P2404484 | 1700001L05Rik | TTCTTTGCCAAGTGTTCCTTCTGTGGTGTTCAGT<br>TTTGCTCAGGCCTACAGCCATAAG   | 10.226 |
| 92 | A_55_P1962334 | Trim71        | AAAGGATTTACAAACCAACCACCAACAGGAA<br>GTGTAGGACACAGTATATGTCTTTTTT   | 10.157 |
| 93 | A_55_P1985351 | Slc35f2       | CAGCCACCAGAGTGCCGCCTTCAGAAAACCTTAT<br>GTAAATTGTTTTGTATAAGAATAAT  | 10.111 |
| 94 | A_55_P1954006 | Ldhb          | AGGCTTGTGATGTTTGCCTAGGAGCTCCTGA<br>TCAAATAAAGTTAGCAATTGCAGCAT    | 10.103 |
| 95 | A_55_P1975370 | Apoc1         | TCCACGTAATGTGCCAGGTCCCTTTCATCACAG<br>ACCAATAAAAAACGTGTAGAAGGCAA  | 9.961  |
| 96 | A_51_P486810  | Gpx2          | GGGCTCTAAGTCTGGGGTAGGTTCTGGGCCTTC<br>ACAGAATGATGGCATCTTCTAAACCC  | 9.928  |
| 97 | A_66_P124011  | Spint2        | AACCGGGAGTACAACCTGTGCTGTTTAAAAAGA<br>GAGCAACTGCTTGCCTGAGATCATT   | 9.862  |

|     |               |               |                                                                    |       |
|-----|---------------|---------------|--------------------------------------------------------------------|-------|
| 98  | A_55_P2036086 | Gm3761        | GCAGGCGTCTGTCTATGGGAGAAGGTATATTTAA<br>TAATAAAGCGTGCAATTCATAGAAAAAA | 9.781 |
| 99  | A_55_P2076085 |               | TCTAGCAGGAGGAAGAGGGCTCTCGAATGCATG<br>GATGGATTGTGCATCTCATCTGAATAA   | 9.755 |
| 100 | A_52_P817257  | Gm5480        | GCAATGGTGTGGATAACTTGGCCCTGGAACCTTA<br>ATGCTAACTTGCCTTGGCATGGGTC    | 9.752 |
| 101 | A_55_P1989921 | Eml2          | GGGACGAATGGGCCACCATGCCTTGTGGGAGCC<br>ATTGGTGTGGTTGGGTTGGGATTTTTT   | 9.695 |
| 102 | A_51_P103397  | Vwf           | CAAGTGAGGCTGTGCAGCTACAGCGATTCTCT<br>ACTGATACCCATGCTATGACCTGGCTA    | 9.694 |
| 103 | A_55_P2027995 | Rpl10l        | ACCAAGCTGCAGAACAAGGAGCACGTGATCGAG<br>GCCCTACGCCGAGCCAAATTCAGTTC    | 9.689 |
| 104 | A_55_P2143219 | Rasgrp2       | TCTGTTAGACCAAGAAGGGAACCGCAGGCACAG<br>CAGCCTCATCGACATCGAGAGTGTGTG   | 9.435 |
| 105 | A_55_P1965233 | Sh3tc1        | ATTTTGTGAGGGTTGGGGGAACTGAAGGACC<br>AAACAGTAGTAAATATTTTTCAGCAAC     | 9.399 |
| 106 | A_55_P2180744 | Clstn3        | TGAGGGTAGGGGTGGGTGTGGTAAAGGAGGG<br>CCGCACCCTAGGGTTTTCAATAAAACA     | 9.352 |
| 107 | A_52_P23225   | Gpc3          | AAATGGTATCTTTATGAGGATGGTAAATTTAGT<br>GGTAGGATAGATTGTCTTTTTCGAAA    | 9.133 |
| 108 | A_55_P2037081 | 2610305D13Rik | CCCCCTTTTGTCTAGTCAACAACCTCTCACTAA<br>TGTATTGTAAATAAAGCTGAATGAT     | 9.128 |
| 109 | A_55_P1999511 | Aurkc         | AGGAAGCTCTCCAGGCTCTGTTTGTAGTCATG<br>TGGATTGCTTGTCTCTTTTATGA        | 9.059 |
| 110 | A_55_P2173188 | Kank3         | GCTCTGCATTACAGCGTGTCTCATGGGAATCTCG<br>CCATTTCCAGCCTGCTACTGGATACA   | 9.043 |
| 111 | A_51_P341108  | Spint1        | ATAGAAGGACCTGCTTATCCAAGAGCTGGAGAA<br>AGTTGGTGTGGTGTCTTGTTCAAAG     | 8.863 |
| 112 | A_51_P231946  | 1700029P11Rik | CGTATTTCTTCTGGAATCGGCCCTGGATTTTCAGAT<br>TGCTGCCCGCTATGTTTCTTTTA    | 8.705 |
| 113 | A_51_P112223  | Gsta4         | GCTGGAGTGGAGTTTGAGGAAGAATTTCTTGAG<br>ACAAGGGAACAGTATGAGAAGATGCAA   | 8.637 |
| 114 | A_55_P2140903 | Vax2os2       | ACTAAGGTTGGCGAGGCCCATGTTCCAGAA<br>GTAATTCCAAATAAACTCCTTTGTTC       | 8.563 |
| 115 | A_55_P1988384 | Slc7a3        | GGATATGAAATAATGCTCTGTATTTCTGTGAAA<br>TGATGGCTATGTCTTGTGTTTCTC      | 8.474 |
| 116 | A_66_P107379  | Mdk           | CTGCACCTCCAAGACCAAGTCAAAGACCAAAGCC<br>AAGAAAGGAAAAGGAAAGGACTAAGT   | 8.464 |
| 117 | A_55_P2143233 | Rasgrp2       | GTTTCTCATGATGCACCCCTGGTACATACCTTCT<br>CTCAGCTGGCTTCGAAACTGCTCCA    | 8.276 |
| 118 | A_55_P2199118 | Bend4         | CTAGAAGGCCACATGTTCTGTTGGGGTAAAATT<br>GCACAATAAATGTCAAGTTACCTGTT    | 8.254 |
| 119 | A_52_P338956  | Aspg          | CTGCTTCCAGCCTTTCCGCACGACAATCTGAAG<br>GTCTTTGTTGAGAAGAATGTCAATAA    | 8.175 |
| 120 | A_55_P2024366 | Raver2        | GCTGTGATTTTCTGTGTGCTAATGTTTGAA<br>ATGCTTTTCAAGATGCAAGCTTAATA       | 8.158 |
| 121 | A_55_P2123496 |               | CTAAAGTCTGAAGTCTTAAATTGTTCAAGGCAAT<br>CGCTTAACTGTCAACCTTATGTAAT    | 8.154 |
| 122 | A_52_P236448  | Ngfr          | TCCAGCTGGCGACTATGAGATCCAGACCTTCTCA<br>TGTTCCCTGACACTTCCCTTTGCAT    | 8.066 |

|     |               |               |                                                                   |       |
|-----|---------------|---------------|-------------------------------------------------------------------|-------|
| 123 | A_51_P125842  | Tmem51        | CCCCAAGTGCTGCTGGTTCTTTGAAGGTCTAAGG<br>CCTGATGACCTTCAGCGTGCGACACA  | 8.015 |
| 124 | A_55_P2143251 |               | CTTCACATGGCTTCTGCATGTACAGTATTTGGGC<br>AAAAACAAAAATAAAGTCCATTTG    | 7.852 |
| 125 | A_55_P1968340 | Plekhh1       | ATGCTTGACACCCATGGCTGAAATGCTATGTATG<br>TTTGTCAATAAACTGTCAGTGAACC   | 7.702 |
| 126 | A_55_P2123502 | Jam2          | TTCGTGATTTCTGTATGTGGCCTTGGCACATGCT<br>ATGCTCAGAGGAAAGGCTACTTTTCA  | 7.606 |
| 127 | A_55_P2070992 | Aldoc         | TCCAGCCCTGACTCGTGCTCCTTATGCTCTGAGTA<br>CATAGCAAATAAATGAGAGCAAAC   | 7.473 |
| 128 | A_55_P2019054 | Acacb         | CCTGACCACTGGGTGCGCTGAAGAGGCTGCTG<br>AAAGAGCTGCAAATAAACTATTTTTT    | 7.466 |
| 129 | A_55_P2071811 | Eml2          | TGGTTTTCTGCTGACGACTTTGGCAAAGTGCACCT<br>GTTGAGCTACCCCTGCTGTCAGCCGA | 7.459 |
| 130 | A_51_P472249  | Slc7a7        | CTCTTCTTTACAAGGGCCAACAATGCTCCAAAC<br>TTGTCTCCTTCAGAGGAACACAAAA    | 7.384 |
| 131 | A_52_P354744  | Slc2a3        | GTGCTTACACATTTAGACCCCTTAGGCAAACCC<br>TTGCATAGAGTGGTAGAGCCATATCT   | 7.355 |
| 132 | A_55_P2002572 | Ephx2         | TTTTGAAGCAGCTGATTGGAGAGTAAAGATTTT<br>CATTCAATAAAGCTAAACCTCAGGGC   | 7.276 |
| 133 | A_55_P2026982 | 2610019F03Rik | CTCCTCTCAGGAGGTGAAGATGCACTGTAAACCA<br>GAAAGATTAATTACAATGATTTTTT   | 7.266 |
| 134 | A_55_P2097340 | Camkv         | GGGCTAACTGTGTGCCTACTGAACCTGGCAAATA<br>AACGTACCCTGCAAAGCCTCTGGCC   | 7.168 |
| 135 | A_55_P2155504 | Lck           | AATCTTATGTCTCTGTGTGTTCTGTCTGGTGCCT<br>AGCACACACCAGGAGCTCAATAAAA   | 7.105 |
| 136 | A_55_P1954718 | Cyb561        | CTCCTGTGACGTACAGTGTGTTGTTGGTGCAACA<br>GAGGAATCAATAAATGTCTACAGCTG  | 7.092 |
| 137 | A_51_P273538  | Syce2         | AGGCATGCTGATATTGTTTTTATAGTTCTGTAAC<br>CCAACACAAAGCCACCAATGCTCTT   | 7.088 |
| 138 | A_55_P1955998 | Nlrp1a        | AACCTGCGGAGCCACACAGTGCACCTTTCTACT<br>GGACCAGAGATTATTCGGCGGGAATC   | 7.070 |
| 139 | A_55_P2067722 | 2310057J16Rik | AGCTCAGTCCCCTGTCTGCTCCTCCACTTTCTTGA<br>ATAAAATAACTGAAAAGAGAAGCTG  | 7.049 |
| 140 | A_51_P510418  | Aldh1b1       | AAATCTGATTTAGCCTGAGTCCAGTGAAGTG<br>TTACAAGAAGTGTCAACCAATAAAGT     | 7.045 |
| 141 | A_55_P1963002 | Ppfia4        | TGTGTGTGGCGTGAGCGGGTGTGTACGTACCA<br>ATAAACATCCTGGTTTTAAGACAATGT   | 7.034 |
| 142 | A_55_P1968231 | Rbpms         | AACCTTATATTTAAGGGGAGGGACCTTAGTTTGG<br>AGGTAACCATTGCCTCAAGAGGAGCA  | 6.999 |
| 143 | A_55_P1969392 | Rpl39l        | CTGTGCTTTAGTGAGTTCATTGAGCAGTTCAGTA<br>ATAAATATGTGAAACCTTTGTTTCG   | 6.974 |
| 144 | A_66_P107818  | Gdf3          | CTATCAGGATAGTGATAAGAACGTATTCTCCGA<br>CATTATGAAGACATGGTAGTCGATGA   | 6.948 |
| 145 | A_51_P282837  | St14          | CTCAGAGTCTTCCAAGTGGGACCCCTCAAGA<br>GTTGGAGAGAGAACTTGCCTGCTAGC     | 6.925 |
| 146 | A_55_P2037608 | Acp5          | CTTTCTGGGAACGGGCTTTCTTTCTCAGTCAAGTC<br>TTACTGCTACTGCTATTCAATAAAA  | 6.773 |
| 147 | A_55_P1957049 | Bai1          | GAAAGAAGCGGGTGGGAATCTATTTTTCTCT<br>CCTTTCTTTCTTCAATAAAAAGAA       | 6.761 |



|     |               |              |                                                                  |       |
|-----|---------------|--------------|------------------------------------------------------------------|-------|
| 148 | A_55_P1971244 | Ndufa4l2     | TGTCCTGGGGATCAAACAGAAGCAGCCGTGGG<br>CAAAATACAATTTTCATTTAACAAATTG | 6.674 |
| 149 | A_55_P2102060 | Gstm3        | TCATGTACAATAAAGCCTGAAACACACTTGAAAC<br>ACAATAAACACTGAACACTTGCTGTG | 6.642 |
| 150 | A_55_P1998943 | Oas1a        | TGCCACCTGTTGGAAGTTCTGTCTGACAAAGT<br>CTGATCAACAATAAACACAGCAGGT    | 6.595 |
| 151 | A_52_P379277  | Enpp3        | CCCACGTTTGAACCATTATTTGAATGAATGGAT<br>GTATAAAGCCATTTGACAAAATGGGG  | 6.537 |
| 152 | A_55_P2127934 | Palm3        | CCCTTCTGCAATGAAGCCTTTATACTTGAAAATTA<br>AATGTTAAGGCACTCTGGCTTTAAG | 6.463 |
| 153 | A_51_P148612  | Cox7a1       | ACAACGTCCTGTACAGACTGACCATGACGCTGAC<br>TCTGGGGGCACTGCCTACTGCTTAT  | 6.428 |
| 154 | A_55_P2259125 | LOC100303645 | TATGGGAGCAACCAGTCCCTCAGCCTCCAAACA<br>TGAATAATAAAGTCTTGTTCTCTTGA  | 6.415 |
| 155 | A_55_P2097828 | Gmfg         | CCTTTGAGCCAGGGATTTGGAATCCTTACTTCTG<br>AAGGCTCAGATTGATAGGATATGAAC | 6.414 |
| 156 | A_55_P2130535 | Dnmt3b       | GTGCAAAGATGACAGATGCCAGATTTACCTTT<br>CTGGTTGATTAAGTTGATTTCTCT     | 6.291 |
| 157 | A_55_P2052281 | Rnf208       | CTACCCTGCGTGGCATTGTCGCTGCAGCCAATT<br>TGCCATTAATAACTCTTTGCCAAAGTT | 6.261 |
| 158 | A_55_P2428968 | Lrrc2        | CTTACTGCCCGTCTCTAAATCTTTGAATATGTG<br>TTACCTCTTATTGGAATTGCGGCTT   | 6.241 |
| 159 | A_66_P131110  | Zfp473       | GCACACAGGAAATGTTTCTATTGATGAAGTGT<br>GGATGAGTGTCTAACTATCTAGTACAA  | 6.219 |
| 160 | A_51_P486681  | Ap3b2        | CTTCTACCTGTTTCTATGGGTTCCCTAGTGACTT<br>CCTAGGGGAAGACAGAAGCTGCTCC  | 6.138 |
| 161 | A_51_P273609  | Itpka        | CCCGATCCATAATTGTACTTCACAGGTATATAGA<br>CTTCTGGTCTAACTCTGCACTACA   | 6.125 |
| 162 | A_52_P648601  | Dusp9        | CACTGAGACTCTTTGTACTGAGGGTGGTCAAAC<br>TGCCACCGGAGGAGATAGGGTCTCAG  | 6.022 |
| 163 | A_51_P438821  | Pycard       | ACCTGCAAGGACTCCCTCCTCCAGGCCTGAAGG<br>AAATACATCCCTACTTGGTGATGGAC  | 6.011 |
| 164 | A_55_P2170847 | Fbxo27       | GCCTAGAGTCCAGGCCCGATCATCAAAGATGTC<br>TATATTGTATAATATTTAAAGTTATT  | 6.001 |
| 165 | A_55_P2044439 | Mfng         | ATAGAAGGGTTTCTGGAATACATCCAGCCCAA<br>GACCCCATCTTCTACTATGAATGTG    | 5.842 |
| 166 | A_55_P1968178 | Smagp        | CCACTGTTCCCAATCAGCCTCAAACCTCTACTGT<br>TTTTATCCTAATTAACCTTATGAAA  | 5.765 |
| 167 | A_55_P1974019 | Dapk1        | CTGTCTGAGAAGCATGTCATGTTACCATATCAT<br>CTGTACATATATATGCACTATGTA    | 5.737 |
| 168 | A_55_P2075966 | Spnb4        | GGGCGGTGTGGCAGGCGCACACTGTATGTACCT<br>ATAATAAACCTTTGGCTTTGACAGTC  | 5.701 |
| 169 | A_55_P2088385 | Tnnt1        | CAGGAGCCACTGGAGCGTGCCCATCTGTAATC<br>AAAATAAAGTGCCCCAGGCATCTGC    | 5.696 |
| 170 | A_55_P1973578 | Foxh1        | AACAAGAGTATCTATGATGTGGGTGAGCCATC<br>CTAGGGACCTGGCAGCTCCTGCCCA    | 5.647 |
| 171 | A_51_P338443  | Angptl4      | ATGGTGCTGTTGTAGGTGCTGTGGATGCACAGG<br>TGCTAACTGTGGTTCCAGGCACAGCT  | 5.594 |
| 172 | A_55_P2052485 | Ushbp1       | CTGGCCTCTGCAGGCTCTGTACTAATGTTCCCTCA<br>CACATGTAATTAGACAAAGTAACTT | 5.562 |

|     |               |            |                                                                  |       |
|-----|---------------|------------|------------------------------------------------------------------|-------|
| 173 | A_51_P312949  | Tdrd12     | AGAGTGTTCCTGGTCGATTTTGCCAAGTATATT<br>CCAGTAAATCTAAAAACATCCGAGT   | 5.555 |
| 174 | A_52_P350786  | Phlda2     | ACCATTCCGTGTTAATATTTTTATACCATATTTTC<br>ATTCCAAATAAACAATGTCACTTT  | 5.518 |
| 175 | A_55_P1973447 | Ybx2       | TTTTATGAACTGTCATGTGCCACCTGAGCCTCCA<br>GTAAAAACAAGCAGGCTTTCTTGT   | 5.494 |
| 176 | A_52_P633560  | Nodal      | TTATTAGATTATAAACGAGCCATTTGGTTCTCCCT<br>GCCTCAAGCTGTGGTAGGAAGACC  | 5.478 |
| 177 | A_55_P2055324 | Spint1     | GGAGAAGGCCCAAGAGTCTGGAAGGAGCAGAG<br>CAGCCTTGAGCCAGGAGTACTGTATATA | 5.461 |
| 178 | A_55_P2008722 | Gm13157    | TATCAAGGTGATTCTGAATCCCCCAATGTACA<br>CCTTACAAAATAATCACAGCTCTCT    | 5.419 |
| 179 | A_51_P487918  | Rinl       | AACGAACGGATGGGAACAAGAGAGACGGGAGA<br>TGCTGGGCTACTCCAGGAAAGCTTCTCC | 5.409 |
| 180 | A_51_P270733  | Syng1      | ATGTGTACTTCCCGCAGATCAGCAGTGTCAAGGA<br>CCGCAAGAAGGCCGTGCTCTCTGACA | 5.404 |
| 181 | A_51_P241769  | Rhd        | TTGGTTTCATGACAGAGACTATTAATACTTTGGG<br>ATGAATACACCTCATTAAAGTTCTGG | 5.392 |
| 182 | A_55_P2144341 | Gm7029     | AGGAGGAGGCAGCTCTGGTCTCTGAGCATCTT<br>CATAGACCACCTGTCCTTGTACTGAG   | 5.388 |
| 183 | A_55_P2047461 | Fcho1      | TGGACAGGAACCCATTTTCAGCCTGGCTCAGCC<br>AACTCTCCGTCCACAAGCAGGCCCT   | 5.355 |
| 184 | A_52_P562676  | Sult4a1    | AGTACTGTACGGATGTTCTGGAACACACATGGT<br>AATCTCTGCTGCCTGCATCTTTAAT   | 5.353 |
| 185 | A_51_P451588  | Plekhb1    | AACCCCTCATGTGCCTGTCTATAGGTAGCAAGCA<br>ATCTCTCATTTGATCCTGTTCCAAA  | 5.335 |
| 186 | A_55_P2015687 | D14Ert668e | CCATGGGTTTATGCTCACTATCATATCACATTGCC<br>AATATTTAGCACACTTAATAAATGC | 5.329 |
| 187 | A_51_P280893  | Pla2g1b    | CGTACAACAAGGAATACAAAAACCTTGACACCG<br>GGAAATTCTGTTAGCCTGTACCTCAC  | 5.316 |
| 188 | A_55_P1995243 | Cobl       | TTAGTCACAGCTGTCTGCTTTTCTCTTAGTGCCA<br>CAAATAAATGCAATCCAATGCTGT   | 5.281 |
| 189 | A_55_P2035812 | Rnf208     | TGCGTGCCATTGTCGCTGCAGCCAACCTTGCCAT<br>TAAAACCTTTGCCAAAGTAAAAAAA  | 5.276 |
| 190 | A_55_P2047335 | Capn5      | GCCTCAGTGTGGAGGGCCCCAAAGAATCCC<br>GTCTTGTTGGGGAGTTTTCTTGCCCTAA   | 5.246 |
| 191 | A_51_P246317  | Mt2        | AGAAGCCTAGCCTTTTTGTACAACCCTGACTCG<br>TTCTCCACAACCTTTTCTATAAAGCA  | 5.208 |
| 192 | A_55_P2074371 | Lin28a     | TTCCTTCCCTTCTTCCCTGGGAAAATAAAGACT<br>TATTGGTACTCCAGAGTTGGTACTG   | 5.206 |
| 193 | A_51_P412914  | Efs        | GCTGAAGATGACAATGTAATAGTCTGAGAAACA<br>CCAGAGAGCTTCTCCCTCACAAGTCA  | 5.201 |
| 194 | A_55_P2080880 | Clcnkb     | TGACTTCTGGGGTTGCCTGCTGCTAACCAGGAGC<br>TTCTGAGAAAAATAAACTGATGTCT  | 5.199 |
| 195 | A_55_P1971897 | Mdk        | CCCTCTTTGTTCTCCACCTGATACTTGTATT<br>AAGAAATGAATAAAATAAACTCAC      | 5.146 |
| 196 | A_55_P2128501 | Krt8       | AGATCTCCGAGATGAACCGCAACATCAACCGCCT<br>GCAGGCGGAGATTGAAGCCCTCAAAG | 5.131 |
| 197 | A_51_P208145  | Si         | ATCTCTGATACTAGGCATAGACTTAAGAAGCAGG<br>GCTCAGTTTCCCAATGCCACATGGT  | 5.127 |

|     |               |               |                                                                   |       |
|-----|---------------|---------------|-------------------------------------------------------------------|-------|
| 198 | A_55_P2019694 | 1700061G19Rik | AAGAGGAAATCCAGAACTCTATGAGACTTCGA<br>CCTCTAGGAACCCATTACCCTAAT      | 5.096 |
| 199 | A_55_P2048119 | Slc29a4       | CCTGTCTACCTGTGTCTCTGACTACCGACTG<br>GCCATTAAATATGGCAGAGACTGCC      | 5.050 |
| 200 | A_51_P155755  | Pld6          | GGGGGAGCATGTTGGAGTAACAAGTCCTGATAT<br>CCCCTTCTGGGCCACCCTTAGCCTCT   | 5.050 |
| 201 | A_55_P2125963 |               | GAATTCATACAGGAAAGAAACCTTACAAATGCA<br>GTGAATGTGGGAAATGCTTTACTGACA  | 5.026 |
| 202 | A_51_P154842  | Oas1f         | CCTGTCCACCTGTTGGGAGTTCTGTCCAATGTC<br>TGATGCACAATAATAATACAGAGA     | 5.020 |
| 203 | A_55_P2064538 | Gm13154       | GTGTGCTTCGAGTATCTACTAATCAGAATTCTTCT<br>CAAATGCTTGTGTTGTCATTATAGGA | 5.016 |
| 204 | A_55_P2076462 | Lnx1          | ACGCTTGCCTGGCCAGGATGCTCAAGGAACTTAA<br>AGGGAGAATTACTCTGACCATTGCTT  | 4.966 |
| 205 | A_51_P498772  | 1700019D03Rik | CAAAGATGCTCTTGAAGTAGTCTCATTAAACACA<br>GCTTGCCTTACCTGCCAAAGCTCTT   | 4.951 |
| 206 | A_55_P1976734 | Cacna2d2      | TGTCAGCTGTCTCTGTGGGGCGTGTGTGTAA<br>CTGTAGTGTAGTCAGGTGCTCAACGGA    | 4.927 |
| 207 | A_55_P2015541 | Hif3a         | CAGAAACCACAAATGTCTCCAAAACCACCATAA<br>AGACCTCTCCTTGTAGGCACCAGAG    | 4.907 |
| 208 | A_55_P2091551 | Arhgap9       | GGTGATGCTTGTCTCAGTATTCCTTTATTGTCAG<br>GAAACTGTGCATTATTAAGTTTG     | 4.906 |
| 209 | A_55_P2097448 | Rbpms         | TTTGTACATATCAACCTACTGCAGACCAGCAGA<br>GGGAGCTCCCGTGTGAATTTATTAG    | 4.902 |
| 210 | A_51_P107020  | Kif5a         | AAATGTTGCATGCCGCGTGAAGACAAAACCA<br>AACCGCACAAATCCAGTGTGTATTTA     | 4.833 |
| 211 | A_55_P2088018 | Fhod3         | GTACACACATACAAGCACAGCTTGTTTACCAGTT<br>GTGGATTTAGATGTACTAAATGTTT   | 4.809 |
| 212 | A_51_P350332  | Rbpms         | CTCTCTGCTCCTCAAAAAGGAGCTATGTATTATT<br>ATGTTGACCTCAGAATCCAGCTG     | 4.808 |
| 213 | A_51_P145520  | Sigirr        | TTGCCTCTATCCCTGGGCCCTCAGGAAAGGAGT<br>GTGGCCCGGGTGTCAAAAATAAA      | 4.727 |
| 214 | A_55_P2148688 |               | CTGTGTGCAGATAACATTGTAAAGCGGTATTTAA<br>TTAAAATCCAAGCAGTCTTGCAGA    | 4.720 |
| 215 | A_52_P97889   | B4galnt4      | TTTGGCCTCTTTGGGATCTACAAATCAGACTTTG<br>ACAGAGTAGGAGGCATGAACACTGAG  | 4.642 |
| 216 | A_55_P1995996 | Gm13157       | CGAAAATCCCATCTTGGTATTCATCAGAAAATTC<br>ATACAGGAGAGAAACCTTACAAATAG  | 4.628 |
| 217 | A_55_P2109257 | Nipal3        | CATGTGTTATTTTGCAGAAGTGTGTATACTGTGT<br>GCAGATAACATTGTAAAGCGGTATTT  | 4.598 |
| 218 | A_66_P110161  | LOC626152     | TTACAACTTTTCGTGTCTTCATGTCTTTTGATAAT<br>AAATGAATTTCCGCTCTGTGGGG    | 4.576 |
| 219 | A_55_P2103011 | Sema4d        | TTTCTACTTGGAACTGTACACATTTGAAAAGTACC<br>CAAATAAACCAAGCTTTATCGTT    | 4.549 |
| 220 | A_55_P2002849 | Aifm3         | GGACGATTTTCCAGCAAGCCCTTCAACATTAC<br>CTTAAATTTAAACGCATGTCTCAGC     | 4.547 |
| 221 | A_51_P181341  | Necab2        | TGTTCTCTACTTCCGTCCTCTGTGATGGCCCGCT<br>ACCTAGTAGGAGCTGTGACCCTGTA   | 4.529 |
| 222 | A_55_P2056774 | Hsd17b14      | TTAGTCTGGACTCTACCGATGCCTCTGGCTATA<br>CTCTCCCTTATAGCTACAATAAAAGC   | 4.528 |

|     |               |               |                                                                  |       |
|-----|---------------|---------------|------------------------------------------------------------------|-------|
| 223 | A_55_P2154914 | Acap1         | ATCTCGACATATTCCGAGACTTCTCCCTCATGGC<br>GTCGGACGACCCAGAGAAACTGAGCC | 4.501 |
| 224 | A_55_P2035400 | Ripk4         | CTTGTGTA AACACGGGGACCATAGGAGATCTG<br>TTTTATGTCAATAAAGGACTCCGCCTA | 4.491 |
| 225 | A_51_P414396  | Mmrn2         | ACTGTTTCTCAGAAGGAATGTCTACAGTGATGGG<br>TTTGCCATGCAGAAAAGTCCCAGATT | 4.452 |
| 226 | A_51_P262515  | Phf11         | ACACTGATACCCTGGGTTTATGCTCACTATCATAC<br>CAGATTGCCAATATTTAGCACACTT | 4.444 |
| 227 | A_55_P2137828 | Gprc5b        | CTGACCTCGTCTTAAGCCAGTACATCTGAGCTGA<br>GTGTTTTAATAAATCTGATATTTCTC | 4.443 |
| 228 | A_51_P403814  | Slc4a5        | ATACCGAAAACATACAGCTTAAAATGCCACCCAC<br>CATAGATATAACCTTTCTCGTGAAAA | 4.388 |
| 229 | A_55_P2045367 | G630025P09Rik | AAATGACTATTGCCTTCGGTTTTTTCTAAGCAGGT<br>TGCCCCACGGTAAATCGGTTACACT | 4.379 |
| 230 | A_52_P147803  | AI428936      | TCAGTTATGTCAATGGTCTCCCTCAATCTGAGCC<br>CACCATCCAAGACACGTGCATTA    | 4.365 |
| 231 | A_55_P2056719 | AF067061      | GTGTCTTTGTAGCCATCTGGGTTTTGGTTGTGTTT<br>GTTTTATTTTTCGTTTGTTACAGC  | 4.364 |
| 232 | A_55_P2048759 | 4930583H14Rik | CTTCTCTTACTTTGTTCTATGTAAGACCAGATTA<br>CTGGGTTTGTGTGAACTCATTAA    | 4.348 |
| 233 | A_55_P2175955 | Ano9          | GGATCCGTACAGCGGCAAACTTTTTACAAGCAA<br>AATAAACCTGTGTGATTGATTCTG    | 4.347 |
| 234 | A_55_P1974367 | Fabp3         | TTTATTTTTTAAAAGTATCAAAGGGTGCTCCA<br>AGGTCAATAAAGCAGAACCAAGGCC    | 4.316 |
| 235 | A_55_P2037717 | Slc22a18      | GACCACAAGGCCAGTACTTGCCAGTCCGG<br>CAATAAACTTAAGAACCTCTCCTCTT      | 4.298 |
| 236 | A_55_P2033780 | Fabp3         | TAAAAGTATCAAAGGGTGCTCAAGGTCAAT<br>AAAGCAGAACCAAGGCCACCCAAAA      | 4.292 |
| 237 | A_55_P2042016 | LOC100048058  | ACCTGTGTGTTCTGACTACCGCACTGGCCATT<br>AAATATGGCAGAGACTGCCACCGCT    | 4.279 |
| 238 | A_51_P391291  | Gng3          | CAAGCACCTTCTACTCTATCTATAAAGGGACCCC<br>GCTAAACTGCCAAAATCCTGCCTGTT | 4.270 |
| 239 | A_55_P2022895 | Slc12a8       | CCAAATGTGGAGAATCAAACGAGATTTCTTATT<br>CTAAGGGGCCAAAATAAACACTTCTT  | 4.239 |
| 240 | A_55_P2158653 | Cldn7         | AAAGGCCTCCTGGCCACTCCACTCCAAACATCA<br>TGTATAGTTTGCTTGGGGGAGGGCA   | 4.183 |
| 241 | A_51_P176352  | Ndrp2         | TCAGGAGAAGGTTTGCTGGTGGGTGAGCGATCC<br>TTAATGTGATAGAAATATCCAGCATGT | 4.081 |
| 242 | A_52_P683441  | Capn5         | AAGCCTTGAAGACTGGACAAGGGAGGACAGGG<br>TGGAGCAGGGATAGCCGTGGCTTCATT  | 4.067 |
| 243 | A_55_P2008889 | Tmsb15b2      | AGATCCATTTACTACCCTGGCTGAAAGGTCAGC<br>ATTTGCTATGAATCATTAATTTTTT   | 4.016 |
| 244 | A_52_P108850  | St8sia1       | CAGTTTCTACCTCCCTTCTGGAGAATATTTG<br>GAAACGTACCCTGTGAATAAAATGG     | 3.982 |
| 245 | A_52_P380369  | D14Ert668e    | AAGAAAGGCAAAGGCAGATGAAGAAGCAGCTT<br>GAGGCACTGCAGACTTACAACAAACCT  | 3.973 |
| 246 | A_55_P2173952 | Myh6          | GCACGACGAGGAATAACCTCTCAGCAGACCTC<br>GCTGTGGCCAATACACAATAAACATA   | 3.945 |
| 247 | A_55_P2005060 |               | GTGTTGAAACATACGCTCACTATGGAGAGACTTG<br>GCTGATCTTAAAATAATAGTGTGTTA | 3.937 |

|     |               |               |                                                                  |       |
|-----|---------------|---------------|------------------------------------------------------------------|-------|
| 248 | A_51_P518051  | Dusp4         | AATAACGGCGGTTTCCGCTGCCAGAGAAGACTT<br>GGTTTCTGTGTCAGTTTTACTTTGCA  | 3.889 |
| 249 | A_55_P1954277 | Emid1         | AAGTGCTGCTGCAGATGCCACGAGTCAATATGT<br>ACAGGACAATAAACATCCCTGCTTGA  | 3.876 |
| 250 | A_55_P2110351 | Eppk1         | GTCGGTGATTACAACCTCAGGGTATTACAACCTT<br>TCGTGTCTTCATGTCTTTTGATAATA | 3.868 |
| 251 | A_52_P325116  |               | CCTAGAAACACACAAGGCTATCCAGCCAAATCTT<br>AATGTAAAGTAGCTAGAGCCATGGAA | 3.862 |
| 252 | A_55_P1961014 | Selenbp1      | TGTTTGTGCTTTTCTAAGTGAGCTCCTGGAAGC<br>ACCAAGAAATAAAATGCTGAAACTTC  | 3.842 |
| 253 | A_52_P167382  | Tmem8         | TAGCAGGCTGCTCAGCTGTATGAGGTCTGGCTCC<br>AGAAGGCACACAATGCTCGCTAGTGT | 3.828 |
| 254 | A_55_P2173457 | 1700097N02Rik | CACTTCAATCTGTTGGCTGGCTTGCTTTGCTTTG<br>CTAAATAAAGTCTCCATGCTGTC    | 3.819 |
| 255 | A_52_P244702  | Tcf7          | TTTTTTCATTCTCGCTGTAGATAGCCTGAATCCAA<br>AGAAAACCAAAAGGGGTATCCAAG  | 3.790 |
| 256 | A_51_P139320  | Pcbd1         | GCCATGTTACTAATTTGAATAAGCTCTCCCTTT<br>TTCTGTAGAGTCCAGCCTCAGTA     | 3.782 |
| 257 | A_55_P2007986 | Zscan4f       | ATGTTGCAAGTAAATTGACTGTCCAATAATGA<br>TATAACATGCTTGTGGATTGCCACTT   | 3.774 |
| 258 | A_55_P2104769 | Utf1          | TGCCCCATCCCCATCTCAAACCTAGGTTCTTACC<br>AAAATAAAGATTGTGTTTTCTACTT  | 3.772 |
| 259 | A_55_P1975903 | Dnmt3b        | TGTTTGCCCCCTTGAAGGACCCTTTGCCTGTGA<br>ATAGTTCTACCCAGGACTGGGGAGCT  | 3.750 |
| 260 | A_55_P2072661 | Prex1         | GGCCAGGGCAGCATACTGGTTTATTTAAATGT<br>ACAGATTCTTTTCATTAATTCATGA    | 3.746 |
| 261 | A_55_P2136289 |               | AACACGGGGACCATAGGAGATCTGTTTTATGTCA<br>ATAAAGGACTCCGCCTACTTTTGAA  | 3.736 |
| 262 | A_55_P1987761 | Prkcz         | TGATGAGGACGTCATAAAGAGGATCGACCAGTC<br>CGAGTTTGAAGCTTTGAGTACATCAA  | 3.733 |
| 263 | A_51_P440743  | Celsr1        | GTGTATTTACTGTTTCAGCACTGGATGGCAAC<br>ACAGGTGAGATGATGCATCTATAATA   | 3.689 |
| 264 | A_51_P300506  | Cox6b2        | GGAATTTCCCGGGCAAATATGACCTTGCACTT<br>GAGCGTGCTCCCCTGGCGTCATCAA    | 3.685 |
| 265 | A_55_P2194064 | BC023969      | TTGGATGATTGACCCTACATGCCAGCTGTATTT<br>GAAGAATAAAAGTTCTGTGCTTTAC   | 3.652 |
| 266 | A_55_P2182273 | Bin2          | TAATCCAGAACCAGCAGAAACCAGAGAAAAGGA<br>AGGCGCTGGAAGTTCAGGCCAGAAGA  | 3.604 |
| 267 | A_55_P2093665 | Gm3950        | TCCGAAGCCATCACGTGCTCACTGCTACTGGA<br>CTCAGAGATTATTTGGTGGGAATCAG   | 3.602 |
| 268 | A_55_P2154252 | Gfpt2         | CCCTGCTCTATTTAAAGCGTGCAATCAATGT<br>ACTATGCAATTTACAATAAAGACAG     | 3.600 |
| 269 | A_55_P2102857 | Krtcap3       | GCACGGGGCCCTGACCCTAGGGTGGTATAAAT<br>AATTGTAATAAAAGAACTTGATTTTTG  | 3.568 |
| 270 | A_52_P377576  | Ap1s3         | CTAAATGTAATACTTACATTCTGGATAATCCATA<br>GTTGATCTTGCTAGGTTGCACAAG   | 3.552 |
| 271 | A_55_P1956448 | Ttyh1         | CTCTAAATATGCTGCCAGAGACTGTGAATCACC<br>AGCTATGTGAAAATAATAATAAACAA  | 3.543 |
| 272 | A_51_P201338  | Mtss1         | GGAGATGCTGCCAGCGCAACGAACCTTTAATT<br>AATAAAGCCTAATTTGTCTTGATCCA   | 3.522 |

|     |               |               |                                                                  |       |
|-----|---------------|---------------|------------------------------------------------------------------|-------|
| 273 | A_55_P1961423 | Gsta3         | ATTCAGGCAACTATAAGTACATAGCCCCACAAA<br>GCCAACCTTCTAAAATTTGCATCAC   | 3.514 |
| 274 | A_55_P2151986 | Gngt2         | GTGTACTGGGATACCTAAGGACCAATGTTTTCTT<br>CCTCTTAGACACAAATAAAGATGCTG | 3.501 |
| 275 | A_55_P1965416 | Atp9a         | GGCCCGTCTGAGGTTTGTGGGGTCACTGTGCAA<br>GCTTCCTTATGGTTGAACCTCTTGTC  | 3.468 |
| 276 | A_51_P399175  | Ppm1j         | GCAGTATGAGCACTGTCCAGATGATGTGCTGGT<br>CCTGGGAACAGATGGCTTGTGGGATGT | 3.405 |
| 277 | A_55_P1954486 | Mapt          | ATGGTGGACTACCACAGCTTGCCACACTAGCCG<br>ATGAAGTGTCTGCTTCTTGCCCAAG   | 3.402 |
| 278 | A_51_P345792  | Tmem180       | AAAGCCCTGCAGGCCTCTAACTCTAAAGAGGTT<br>CATCTCATCTCAAGTAAAGCCAGTCA  | 3.392 |
| 279 | A_51_P297105  | Ucp2          | CTCAAAGAGCCCTAATGGCTGCCTACCAATCTC<br>GGGAGGCACCTTCTGAGCCTCTCCA   | 3.389 |
| 280 | A_55_P1977792 | Folr1         | GTGGTGGGGCTCTGACAGCCTTTAATAAACCA<br>GACATTCACATGTGCCTTATGAATT    | 3.354 |
| 281 | A_55_P2008874 | Dnmt3b        | TCAGGTCCCCAGAACCCCTAGTTCCTCATGAGA<br>AGCTAGGACCAGAAGCACATCGTTCC  | 3.353 |
| 282 | A_55_P2002103 | Hmha1         | GTAAAGGAGCTTCCACATGAACTCACAATTTTC<br>TTGAAATAAACTTCTTAACCAACTGC  | 3.323 |
| 283 | A_55_P1995924 | Gm13157       | TGTGAAATGTAGAAAGCCTTTCATGACACCTTT<br>TACTTGTTCACCTCAAATGTTACAA   | 3.315 |
| 284 | A_55_P2019533 | Zscan4c       | ATCCCAAGTCTTAGGGTTGCAAGTAAATGCATT<br>GCCTTTCAGACATCTCATGCCATGT   | 3.306 |
| 285 | A_55_P2029420 | 2610318N02Rik | CCAGTAACTCTTCCCAACAGACCATGCCCCAGG<br>ACTGAATAAAGTTCATCCTGGTGTG   | 3.305 |
| 286 | A_52_P73475   | Fam78a        | ACTCACTGTTTCTAGCAATAAGCACCAACTGCCT<br>TGGTCACGGACAGTACTGTGAACAC  | 3.283 |
| 287 | A_55_P1959305 | Rbm47         | CGTTCATACATTTCTAAAAGACTTGGCAGCCTC<br>ACGCCTTAATGCCATCTCTAAAGTT   | 3.282 |
| 288 | A_55_P1969477 | Abcb1a        | ACTCAGACATGGGCACCTGAGTTCAGATCCCTAC<br>CACCTAAGTAAGCAGCAAGGTGTGGT | 3.266 |
| 289 | A_51_P214269  | Epha1         | TCAATCAGAACTCTGCCTTGAACCAAGGAGCCT<br>TTGTTTATAAAGGGGGTGGATGGGTA  | 3.265 |
| 290 | A_51_P230439  | Ppfibp2       | AAGAATCAAGTGCCTTAGGTTTGTGAGCCACAA<br>AGTCTTGGCTGAGATCAAAGTGCCAA  | 3.233 |
| 291 | A_55_P2139256 | Rps6ka1       | CTCAGCTGGTAACTCAGGGTTCATCTGTCCAAGG<br>CCTTCTAATAAACTTACAATCCAGT  | 3.226 |
| 292 | A_55_P2008427 | Dnd1          | CCCACCACTGTCCCTGGTTTGGGCTTACATGGTT<br>TTTGTTTTCTATACTGGTTTTATT   | 3.187 |
| 293 | A_66_P117578  | Mtmr7         | TGCAGGTTGCATTACGGAACCTTGACATTCCTTC<br>TGCTTTACCAATATTTAAAAGAAA   | 3.186 |
| 294 | A_55_P2128499 | Mgl2          | CGGGTCCCCTCCTCCTTCATAACTAGTGTCG<br>CAACAATAAAATTTGAGCTTTAATC     | 3.164 |
| 295 | A_55_P2003713 | Zscan4e       | AATTACCACAGATCTGACTGAAGTATCTAACATC<br>CTCAGCAGAGACTGGTAGGGCTTCAG | 3.143 |
| 296 | A_52_P144297  | Tspyl3        | TGAGCCCTATTCCAACTGATCTGTTCCACATGG<br>AGAAATGTTCTTTGTGAGTCAGAAG   | 3.140 |
| 297 | A_51_P257743  | Dnajc22       | AGTCTTGAGTCAGCCCAAGAAGCCTAGAGCATCC<br>TAGAGGTGAAAAGCAACCACTTGAGG | 3.130 |

|     |               |               |                                                                   |       |
|-----|---------------|---------------|-------------------------------------------------------------------|-------|
| 298 | A_52_P370203  | Jarid2        | TGTTTTCCCTCACACTTAGAGCCACTAAGTCTGCA<br>GTTCTTTTTGAATGTGAAACACATCT | 3.077 |
| 299 | A_55_P1970274 | Zscan10       | CCCACAGTTTACCTCTTCCCTTGACTCCAAGAATT<br>TGTTTTTAAGTAAAGCTGCCTTCTC  | 3.068 |
| 300 | A_55_P2091153 | BC051142      | TGTGAACAACCAGCTCCTTCTTCTCATCAGCA<br>TCAGCATCAGCAGCAGCAGCAGCAG     | 3.065 |
| 301 | A_55_P2178127 | Sept1         | CGCTCTCCCGGTTCCAATTGGGTTTTCTATTCT<br>CTCCAAGTTCTCCATCTAATAAAAA    | 3.060 |
| 302 | A_55_P1996963 | 1110012J17Rik | GTACCGTGTGACTGTTGCTGTTGGTCTCTGTAC<br>CAGTAAGACAATGGCTCCATTTTT     | 3.051 |
| 303 | A_55_P2071191 | Prss8         | CGAAATTGTTAAGGCCGTACTTTCTGCCACTT<br>GGTCTGACCTGGCCTCTTGCTT        | 3.042 |
| 304 | A_51_P388847  | Stap2         | CAGGCTCCAGGGATCAGTGGGCTATCTCTGGG<br>TACAATAGTCTTCTCCAGCTCTATCC    | 3.029 |
| 305 | A_55_P2111713 | Spint2        | TTGGTAGCTTCGCTGCTCTCTCCGGGGCCAGG<br>TGCCAGCCGAGAACTAGACGTCCAC     | 3.029 |

## b) Down regulated genes in $\delta$ -treated MEF

| No | ProbeName     | Gene Symbol   | Sequence                                                         | Fold change<br>[ $\sigma$ ] vs<br>[DMSO] |
|----|---------------|---------------|------------------------------------------------------------------|------------------------------------------|
| 1  | A_51_P406780  | Serpib9b      | GTAATTTAAATTTACAAACAAGTAAATTTAAA<br>AATATAAAGGAAATTTAAGAGTGCT    | 24.702                                   |
| 2  | A_55_P1964553 | Gm13140       | GGCTAATTATCAGACTAATCAGCCTAGCATAAAT<br>CTGAATTCAAAATATGCTGTCAGTCT | 14.603                                   |
| 3  | A_55_P2063283 |               | AGCAATGGGCATACAGAGGAGAACTACAAGGAC<br>ACCGCACCAGTCTGGACTCTGACGGT  | 7.311                                    |
| 4  | A_66_P102202  | Gm648         | CTACACTCAAGAGTGTGATCCTGCTGTTACAGTG<br>GTCAGCAAGATTCAGCAAATAGTTCA | 7.263                                    |
| 5  | A_55_P2011163 | BC061237      | AACAAATAATTGTGGTTCCTGGAAGTAAGGCGG<br>AGGCTGCTATGTCAAATCCATGTGCCT | 6.644                                    |
| 6  | A_55_P2001458 |               | AGTAAACACCGAGAGACTCATACTCGAGAAAAG<br>CTGCTGTCATAGTCAGTGCTTAAGCCA | 6.471                                    |
| 7  | A_52_P319093  | Serpina3k     | CAAGTTCTCATGATTCTGTCCAGGGCTCTGGGAC<br>AGAGTCTGCATATGGATCTCTATATA | 6.060                                    |
| 8  | A_66_P109757  | A430033K04Rik | GGCATCAGGGAATCCATGCGCCTGAGAAACCCT<br>ACGAATGTAACGAATGTAAGAAATCTT | 4.859                                    |
| 9  | A_55_P2014352 | Gm2494        | GGAGGAGGAAAAACAAACAAACAAACAA<br>ACAACATTAACCAACCAACCATGCTGG      | 4.786                                    |
| 10 | A_55_P2425442 | D030036P13Rik | CACACACAATAGCATGCACATGCATGTATACACA<br>CACCCACAAATAAACAAACATAATTA | 4.712                                    |
| 11 | A_55_P2111114 |               | GGGAAGACGCTGCTGCCTCACTTGTCTCCTTTA<br>TCTCAGGTCGCAGCAACACTAGCTAG  | 4.670                                    |
| 12 | A_55_P2030186 | Ifna7         | CTGAACATCTTACATCAAAGGACTCATCTGCTG<br>CTTGGGATGGATCCCTCCTAGACTCA  | 4.637                                    |
| 13 | A_55_P2058602 | LOC674794     | ACTCATGAACAACGAACAACCATGAAACAGAAC<br>AGAACAGAACAGTCCCACTTCTCGAGG | 4.461                                    |
| 14 | A_55_P2125997 | Grin2d        | TCTTGGAGCCACCAGCTTTTTTAAACCCGAA<br>AAGGGCTTTTTAACGTCACCTGATTG    | 4.140                                    |
| 15 | A_52_P307749  | Slc35a5       | AAGGACAATGTGAAGGTAAGAGGTCCAGAACCA<br>TTTCCAGGTAATAATGGAGTGGAAT   | 4.116                                    |

|    |               |               |                                                                   |       |
|----|---------------|---------------|-------------------------------------------------------------------|-------|
| 16 | A_55_P1958876 | 4833422C13Rik | GACCACCAATAGATTCTACCAGAAAAGAAAATC<br>CTCCCACCACATAATAATTAACACAC   | 4.083 |
| 17 | A_52_P614207  | LOC100047222  | GCACTGGTACCAACAGAAACCAGGACAGCCACC<br>CAAACCTCATCAAGTATGCATCAA     | 3.988 |
| 18 | A_55_P2100197 |               | GCAAACATATGGAGATCAGAACAGGAAACACACA<br>CACACAATTTAACGAATTAACCTGTT  | 3.749 |
| 19 | A_55_P2169227 | AI836003      | ATCCTTTCTTAGTGCTTTGCTTGATGTCAACCTTA<br>ATAAAAAGGCACCATGTCCCTCTT   | 3.723 |
| 20 | A_52_P101487  | Ddn           | TGAGCGCTTTCTGCCTCCATTCTTTTGCCTTAG<br>GATTTTGTGAATAAGCGAGTAGAGA    | 3.417 |
| 21 | A_51_P493117  | Slc16a9       | CAATGCAATAATGGGGCTCCAAGCACATGAGAC<br>TTGTGTTCTACACTCAGACTTCTGGAA  | 3.354 |
| 22 | A_55_P1959525 | Wbscr25       | AGAATGCCAGGCTTGCCACACAAGGCACAGGAC<br>ACCAAACACAACACACCAGGCACAACA  | 3.329 |
| 23 | A_55_P2213968 | 4933416M07Rik | TGGGAGGAAAGGAGGGAGGGGGAACCATGATC<br>AAATACATTACATGAAAAACATTATTC   | 3.321 |
| 24 | A_55_P2050169 | Vmn1r197      | GAGAATCATTCTACAGTACTATATGTTCCGGAGT<br>TCCTAACCTTGGTTATGCAGTTCTC   | 3.275 |
| 25 | A_55_P2420591 | 2010001M06Rik | CCCAAGGAAAATCCCGGGCCAAGGAAATAAGGG<br>GGCTGGGGAATTCTCCACCCAAAAAA   | 3.237 |
| 26 | A_55_P2162970 | Gm3734        | GCACAAAAGTGGTACACAGATACACACAGAAGC<br>TAAACACCCATACACATAAAATAAAAA  | 3.233 |
| 27 | A_55_P2061036 |               | GAGAATTTGAGGCCATTCTGGCATAACAGGGAAC<br>CCTGCCTCAAAAATCATTCTGCTCAC  | 3.232 |
| 28 | A_55_P1995104 | Btbd19        | ACTGGTGGTACGTGGGCAGGCTGCACCTTTTCC<br>ACAGCACTTGAAGCCTCATCAACAA    | 3.204 |
| 29 | A_55_P2093053 |               | AGTTGAAATTGGCCTGGTGGAAACCCATAGATCT<br>GATGCCCAGGATGAAGAGAAACACTT  | 3.202 |
| 30 | A_51_P202920  | Wbscr17       | ATACAACAACACTATCGCCTATGGGGAGCTTCGT<br>AATAATAAGGCCAAGGACGTCTGTCT  | 3.191 |
| 31 | A_55_P2058195 |               | TTGGATATGATAAGTAAAGAATTGGAACAACCTTG<br>AGCGCACAGCAGAGGAACAACGCTTA | 3.144 |
| 32 | A_55_P2044050 |               | ACCCACGCCGGAACCGAATCAAACAGCACACCCT<br>ACAGAGGGCAATGAACCAGCCATTTA  | 3.131 |
| 33 | A_55_P2195077 | 1700066D14Rik | GGTTAATCGCCCCCTGGGAAAAATAAATTACCC<br>ACCTTTTAAAAAATCTCAAAGGAA     | 3.092 |
| 34 | A_52_P104658  | Krt6a         | AGCAAGAAGAGCTACAGGCAGTGAATTCTGTCA<br>CCAAGAGCTTGTCTCTGGTCCAGATG   | 3.087 |
| 35 | A_55_P2172196 | Thns1         | GCCTGGGATACATGAGGTCCTGTTTAAAACAAAC<br>AAACAAACAAACAAACAAACAAACA   | 3.074 |
| 36 | A_55_P2372528 | 4122401K19Rik | GTGAGAAAGGTGAGGTGATTCAACAAAATAAAT<br>TTTGTCTGAAACTGCACAATAAAACC   | 3.043 |
| 37 | A_55_P2014710 | Naip7         | GACCACACACTCATGCAAGCATACAACTGACT<br>TAAATTTAACATCAAATCCTACTGG     | 3.038 |
| 38 | A_55_P1959843 | Gm2640        | TTCTTGTGTGCCCTGAGAAACAAAGTTCAAATA<br>ACCATTGTACAGCCAGCATCGCCAA    | 3.029 |
| 39 | A_55_P2043033 | Pla2g3        | AGGAGTAAATGAATTAATCAACACACATACCACC<br>CAGTAAACATTCTTCTTCTAACAC    | 3.014 |
| 40 | A_55_P2091916 | Gm8005        | TAACATCTCATGCTCAGACTTGAAGGACGAG<br>TCCATCAGCAAAAAACCCACACCAAT     | 3.010 |
| 41 | A_55_P2431897 | Thap6         | GAAAAGAGAAAACTTCACTGTAGAAAAAATT<br>CCTTCTCAAACCTTCCCATCACCCA      | 2.995 |
| 42 | A_66_P136215  | 4921517L17Rik | GGTCGCCGGCGCTCATCGTCAAGAAGGGGCGAG<br>ATGGGCAATAGCTTTTATTTCATCTAC  | 2.972 |
| 43 | A_55_P2136970 | Gm7269        | TCAACATTCAAAATATGAGGAAGGAGGTGACA<br>TGATTGAGCCCAAGCCTCCTTAAGCA    | 2.955 |
| 44 | A_55_P2034968 |               | AGAACAAGACTCCTAACTGCCATGTGCCAGAATG<br>AGATGGTGAAAAACAAACAGATCTGC  | 2.949 |



|    |               |               |                                                                   |       |
|----|---------------|---------------|-------------------------------------------------------------------|-------|
| 45 | A_55_P2032553 | 9430024F10Rik | CCGTGGGCACTTGCACTCATATGTACAAATCCAC<br>ATACAGAAAACAAACACATTTAAAAAA | 2.935 |
| 46 | A_55_P2363040 | 1700007J24Rik | CATCCTTTCTTGCTACATCCCCTAAAAGTTGGCC<br>AAGTGTACTTCACTATTATATATTA   | 2.841 |
| 47 | A_55_P1994942 | Rorc          | TTGAGGTTGCAGCTCTGAGAAGCCTGAGGTTCTA<br>ATTCATACAGGACACCAGAATTCATC  | 2.840 |
| 48 | A_55_P2420694 | AV074028      | GCAGAGTGATATGGACAGCCATGACCTGAGAAA<br>GTTCTTTCTAAAATAATAAACTCAAT   | 2.831 |
| 49 | A_55_P2078143 | Otop1         | CACCAGCACTCACATGCAAGAGTGTGCTACCCCC<br>ATGAATAATAAAAAATAATAATAATA  | 2.826 |
| 50 | A_55_P2107632 | BC030307      | GTTTAGTAACAGCTCTTTCCTCCTAGTTGGGGTA<br>AAACAAACAAACAAACAAACAAACA   | 2.811 |
| 51 | A_55_P2151414 | Gml           | AGGAACAGCAGCAACAGCAAGAAGAACAAGGC<br>CTCAAACCTTCAGCCAGAGGTCCCAGC   | 2.807 |
| 52 | A_55_P2063618 | Gm10818       | ACAGGGAAGTGTGGGGGGCAGACAGAACAAG<br>GCAAAGATGCCAGACAGTCCCCTCTAC    | 2.804 |
| 53 | A_55_P2179074 | Ciita         | GCCCCATCTAATGCAAAACAAAACAAAACGAAA<br>CAAAACAAAACAAAACAAAACAAAACA  | 2.779 |
| 54 | A_55_P2200890 | 4933407G14Rik | TGCAACCACCAAGTTCTAATGAGCGGACCTCTCAC<br>CCACCAATAAAGTAAATTTTAAAAAC | 2.778 |
| 55 | A_51_P347169  | 4921517D21Rik | AAGGCATACCTAACCTCAATACTCAAGAACCTCA<br>TGAGCCCTGGCAATCTGCCCTTTCCA  | 2.776 |
| 56 | A_55_P1985825 | Gm2980        | TAGACCTTAAAATTGATGTGGCCATGCCCTTGGA<br>CTTCAGTAAAACCAGCTTTCTCGCCA  | 2.738 |
| 57 | A_55_P2146122 |               | AGGGAAGCTACTTCGTTCCAGGCCCTATCTTCA<br>TGGGGTTAGTCTCACCTGGAACCTG    | 2.737 |
| 58 | A_55_P2396370 | A730056I06Rik | GTTTCATGATAGCCTGGGCTACAGCATGATACCC<br>TGTCTGGAAAAATAAAAAATATAAC   | 2.734 |
| 59 | A_55_P1985236 | EG666692      | ACAAACAGCTGCTAAGGGAGCAGATTGCATTGG<br>AAGAATGCAACATAGAAACAAAACAC   | 2.728 |
| 60 | A_55_P1961809 | Adra1d        | AGCAGTGTCCCTAAATGTTCCCAAGACGGGGC<br>AGAGGCTGTCATCTGCCAGGCTTATGA   | 2.720 |
| 61 | A_66_P105526  | Mam1d1        | AAGTCACATGGGTCATCAACTCTGAAGAAGCAG<br>CAAATCAACACCGGCCTTCCATTCCC   | 2.695 |
| 62 | A_51_P331288  | Akr1b7        | GAGATCCGTGCATGATAGATTCTTCGTCTCTCT<br>AAAATCAACCTGGATGTAGGCTACCA   | 2.677 |
| 63 | A_55_P2066240 | Zufsp         | CTCTCCAGTGAGAGAATATCAGCTGTAGAAGATT<br>CCATAGATAATATGGACACAACAATC  | 2.661 |
| 64 | A_55_P1973813 | Gm7660        | TAATATGACAGAAGAAAAGACCAATGCAATTGC<br>ATGAGCCCTTGCCAGATTTCAAAAA    | 2.659 |
| 65 | A_55_P2314657 | 4931403G20Rik | GACTGACCACCTACTTCTGACACTTTCTGATC<br>CTTAGTAAACTGATAAAAGAGCATC     | 2.618 |
| 66 | A_55_P2365902 | LOC402769     | TTCTGTTCAGAAGAGGGAGGAGGGGAGCCACA<br>AAATACCATTCAACAAACACCTGAAA    | 2.615 |
| 67 | A_55_P2011772 | Oscp1         | CAGGCCATTCTGGCTGCATAACAAGATAGATCTT<br>TTAAAAAACCAAAACCAAAACAAAAC  | 2.605 |
| 68 | A_51_P164393  | Txndc2        | AAGACATCATCCAATCCAAGAAAGAGGACAGGC<br>CCAAGTCTCAGAAGACATCATCCAAT   | 2.555 |
| 69 | A_55_P2146590 | 1810011O10Rik | ACAAAAGACAAGCTTCTCAGTTTCTCAAAGTGC<br>GGAAATATTCCATCAAGGTACTGA     | 2.554 |
| 70 | A_55_P2138718 | Gm14483       | CTACTAGCTGGGGAGCAAATCAAATATGCTATT<br>AAAGCATCTAGATCAAACCAAAAAA    | 2.544 |
| 71 | A_51_P257892  | Adam25        | TAGAACTACCTATGAGTGAAGAACCAAGTTCC<br>CACCCAGAAAACAAAGAAGATACCA     | 2.540 |
| 72 | A_55_P2037873 | Gm10322       | GGGAGGCTGAGGCAAAATTACAAGTTCTGGAG<br>TACATAGTAAAAATTATCTCAAAAAA    | 2.502 |
| 73 | A_55_P2201020 | AI790442      | AAAGAAAAAGAAAAGGAGAAAAGAAAAGAA<br>ACAAAACCTAGCTACCCTAGCAAAAAA     | 2.498 |

|     |               |               |                                                                   |       |
|-----|---------------|---------------|-------------------------------------------------------------------|-------|
| 74  | A_55_P2115181 |               | CTACCAGTCTGTGCCTTAGGTGAACTCTGTAAAA<br>ATGGAATAAAAACAACTATCTTCATAA | 2.483 |
| 75  | A_52_P28582   | Zmym2         | CATCTTCAAAAAATGAAGAACTACAAGGAAACG<br>ATCCCAAAATTTCTTCCTCATCGAAAG  | 2.482 |
| 76  | A_55_P2412859 | 5830468K08Rik | CAAACCCAACCTTAGAAAGGCTACACACAATGGC<br>TACAATTTTCTAAAATGATACCTTA   | 2.475 |
| 77  | A_66_P128733  | BC106175      | GTAAAGTCTAGGAAAAGGCTCCAGAGTCAAAAC<br>CCGGCAACCCAGGGACCAATTCAAATC  | 2.473 |
| 78  | A_55_P2054703 | Gm2659        | AATATAAAGCATCTATAGGACCTAACACCCAATT<br>ACATACCCTAATTCCTAACAGTC     | 2.472 |
| 79  | A_66_P122377  | Cd84          | CTAATAGGCAGCAAAGCATAAGCAGGTCTCTTAC<br>AAAAACATAACAGTAGATTCCTTATC  | 2.470 |
| 80  | A_55_P1968325 | Agbl3         | TAAGCAGAGAATTCCTTACCTAACCAAAACCAGC<br>AAGAAACCCAGTGAGAGTGATGGCCT  | 2.445 |
| 81  | A_55_P2216988 | A830021M18Rik | GCTCTCTCTAAAACCTAACGCCGCCACAGACAT<br>ATGAAATTATATGCCACATCTCCCGC   | 2.444 |
| 82  | A_52_P81693   | LOC100044247  | TCAGAGACCTTCTCAGCCAGGAAACCATCAACCA<br>CCCCAGCATGGAAACAATGAACAGCC  | 2.440 |
| 83  | A_55_P2004031 | Ctrc          | TCTCTTTCAGTACCTCAGGGATGACACTTGGAG<br>GCACACCTGTGGGGCAGTCTCATCA    | 2.434 |
| 84  | A_66_P135403  |               | GCCTGAGCCTCAGAGATCATAATGGGAGGGCTT<br>GGGACTTGACGGAGATCATATAAGAAC  | 2.416 |
| 85  | A_55_P2367878 | Ncrna00085    | CCAAAGGAATCCAATAGAAAAGCACATACTA<br>GGTACTGTTCAAAAACCTATAAGAAAC    | 2.410 |
| 86  | A_55_P2017086 | Ezh1          | GCATTGGGATCTTTGCCAAGAGAGCAATTCAGG<br>CTGGCGAAGAGCTCTCTTTGATTATA   | 2.406 |
| 87  | A_55_P2401624 | C630004L07Rik | GGATGCCTTATCTACTAAGAAGCACACACAGAG<br>ATTGAAAACACTTAAATAAATGAGCA   | 2.403 |
| 88  | A_55_P2054827 | Rxfp3         | CAGGAAAAGAAACCCTAACTAGGACATGCTCCA<br>ATATACAAAATAAATAAAGGGTCAAC   | 2.398 |
| 89  | A_55_P2005549 | Tnn           | GTTTTCTGTAACCAAGTCAGTGACCTTTGAAGTA<br>ACTTAAATTCCTACTCAAGAAAACAC  | 2.394 |
| 90  | A_55_P2183592 | Rpl19-ps5     | GAAACAACCTCCCTTACAATAGCCACATATAATA<br>TAAAATATCTCAGGGTAACTCTAACC  | 2.393 |
| 91  | A_55_P1954521 | 5430417L22Rik | AACGACCGCGGGGGCTGGACGAGGACGAAGAG<br>GAAGCGGCCGAAGAGCCCCGGAGTCGTT  | 2.392 |
| 92  | A_55_P2070510 | Gas1          | ATGGATGAGGACGCCATGCCAGAAGTGCGCGG<br>AACTCGACAAACTTTCCAGCGGCC      | 2.387 |
| 93  | A_55_P2162573 | Art3          | CCAACGGGTGCTAACCATCCAGACCTGCTTTGGA<br>GTCGCGTGGGAAAGTTTCTTAATAA   | 2.385 |
| 94  | A_55_P2175296 | Gm9480        | AATGAAAACCTGAGTCTTTCAAAGGAGACACC<br>GAGAAGAAGTTCAAGACCCCAATGCA    | 2.377 |
| 95  | A_55_P2073825 | Ocm           | AGCCCCATCTGGCAGACAAGGCCTTTAAAAATC<br>ACCCAATAAATAATTTCTCATCATT    | 2.371 |
| 96  | A_55_P2081452 |               | GGAAAATGTAGAGCATTTGCCTAGCATAACATGA<br>ACCCCAAGTTAATCCCAACATTGC    | 2.370 |
| 97  | A_51_P209818  | Prtn3         | TTCCAGAACAATTACAACCCCGAGGAGAACCTCA<br>ATGACGTGCTTCTCTCCAGCTAAAC   | 2.359 |
| 98  | A_55_P1979950 | LOC100046257  | GTCCCTGCTAAGATAGAATATAGTCCCTCAAAC<br>GTAAGCCAGAATAAACCTTCTCTCC    | 2.357 |
| 99  | A_55_P2303868 | 5033421B08Rik | TAAGTTCCTGACGCCTTGACTTAACCCAGGATGA<br>ACAATACCCTAAGCCATACAACCAA   | 2.349 |
| 100 | A_55_P2022024 | Olfr212       | TTCCCTGTCTTTCTTAATGAACTGTAACCTGAA<br>AGCCAAATAAACCTTTCTCTCCC      | 2.346 |
| 101 | A_55_P1976744 | Gm4324        | GAAAAATACGTCTGCCACATCACAGAGATGAAC<br>GAAAACAACCGCCAATCAGATCCATC   | 2.343 |
| 102 | A_55_P2069550 | Gm6750        | GCTGAGAAAAGAAATTAGGGAAATGACACCTTCA<br>CAATAGTCACAACAGTATAAAGTATC  | 2.338 |

|     |               |               |                                                                   |       |
|-----|---------------|---------------|-------------------------------------------------------------------|-------|
| 103 | A_55_P2123854 | Zfhx2         | CCAGAGGAATGAAGTAAAGAAAAACATAAACTT<br>TGAATATACATAGAGAGAGAGAAAAA   | 2.328 |
| 104 | A_55_P1971264 | 6530403M18Rik | ACACGATGGGATGGTGTAGTATAGAATAGAATT<br>TATTC AAGGCATGGGGAGGGGAGTTAA | 2.308 |
| 105 | A_52_P459259  | 4930528A17Rik | CTTAACCTAAATATTGGAAAATGACTTTCTTGAA<br>ATGTCAGTGAACAAAAAGAGTTAT    | 2.302 |
| 106 | A_52_P125253  | Olfr123       | CCATGGGAAGTTCATCTCTCTTTTACACTGTTA<br>TGACCCCGACCCTTAATCCCTCAT     | 2.299 |
| 107 | A_52_P119060  | Acpp          | AGTCAAGTAAAAACAACACAACAGGTCACCTTTA<br>TCCTGTGCTTCACTGTTTTTAATC    | 2.299 |
| 108 | A_52_P628411  | Far2          | TCTGAAACGACAGCAAATTTTCCACTATAAATT<br>TTCCAATTCATGTAACATGCCTGC     | 2.292 |
| 109 | A_52_P578790  | Dok3          | AGCGGCCAGCCACTGCAGGACAGAGGTGATCAC<br>CCAAGACCAGGAACAACCTCGAACATA  | 2.292 |
| 110 | A_55_P2236622 | Gm2763        | AGAAGTTCATCTTTTAGGAAACGCTCCTTGCTTAA<br>ATCTCCAGAATTCATCTGTTTCAA   | 2.290 |
| 111 | A_51_P372702  | Il16          | AACAGTTCTGTGAGATGCACCCTGCCATGAAGAA<br>CACATTCAAACACATAGAAGACTTTT  | 2.287 |
| 112 | A_52_P186751  | BC061237      | AACGATTTGAATGACAGGATCACTTTGAGACAT<br>TCATGCTTGAGATGCAACATAACCAG   | 2.282 |
| 113 | A_66_P102853  | Ccbe1         | TCTGAAAACAAGATCACCACGACCAATACCCAT<br>GTCTGAAGTCTTCGGGCGAGCTCACC   | 2.282 |
| 114 | A_55_P2143832 | Col4a4        | GTACCCATGCAAACGCCACCCACAGACATACTC<br>ATACACATAGAAACAAAAGTAAATAA   | 2.272 |
| 115 | A_51_P224064  | Klhl38        | AAATGCCAGTGAATGCTTTTCAAAAATTCATCCT<br>TACCCCTGAATCAATGTCAGAAAC    | 2.272 |
| 116 | A_55_P1973417 | LOC100041903  | TGGAGTCCCTACAAACAATGACCAATAAACATG<br>GTAAGGCGTACCAATAACAACCAGCA   | 2.271 |
| 117 | A_55_P2171354 | Gm7111        | GAAACCCGTACGACAACAGTACGAAACCAACCC<br>AGAGGACTGCTTTTCTGGACCAACCC   | 2.270 |
| 118 | A_55_P1986691 | Card6         | AGACATCATTAATTACACTCAGTGGTTACCCAA<br>ACCAAACCAAACCAAACCAAACCAA    | 2.270 |
| 119 | A_55_P2139546 | B3gnt3        | CTCCCAACACCAGACAGGAGAGAAAAAGTAT<br>AGAGGAAAGAAAAGAGATTACCCAATA    | 2.268 |
| 120 | A_55_P2018215 | Gm3859        | CAAGAAACCCCTTATAATCTTCTTGAGTACCTGTG<br>TACATGTGAATATACATACATACAC  | 2.267 |
| 121 | A_55_P2098573 | BC003267      | GTAATGAGAGAAACCCTATAAATGGAGTCAAT<br>ATTAGGAAGCCTTTTCTCAGAACAGTT   | 2.265 |
| 122 | A_55_P2222437 | D430040D24Rik | AAGCAAGAAGATCACAAGTTTAAAGCCAGCCAA<br>GGCTGCTGCATAGAAAGAAAGCATCTC  | 2.260 |
| 123 | A_55_P2078133 | Gm7289        | ACCCAGCCAAAAATTCGCAAAAAATCAAATAA<br>AATGGAAAAGCAAGCAGCACCTTTAA    | 2.260 |
| 124 | A_66_P128963  | Cyp2d9        | GCCATACTGGATAACCTGTTGACTGAGAATAGG<br>ACCACCTGGGACCCTGTCCAAGCACCC  | 2.258 |
| 125 | A_51_P308597  | Gcm2          | ACAGCATTTTGAACCTGCCACACCACACAGGC<br>TATTCACCAGATGACACAAATTAATA    | 2.242 |
| 126 | A_55_P2397854 | 4921518K17Rik | CTAGACCTTGGCCTGCCAGATGCCATATCTCTCT<br>GCACTACCTTTATAAGACATTTTTT   | 2.238 |
| 127 | A_55_P2173408 | Gm2419        | TAACCGCGTGAGAACACCTTCTAAGATAAGGA<br>TATTCAAATAAAATACTACAACATCA    | 2.237 |
| 128 | A_55_P2051199 | Gm13710       | GCAAAAGGAAGACCCTCAGACTGAGGTTGAGAG<br>TACTAATTTATGTGAATAAATAAATT   | 2.233 |
| 129 | A_55_P2167776 | Gm2169        | AAGTGGGAATGAAGAATAAAAAATTAAGAAC<br>TCTTCTCACCCAGAGCCCAACCCCT      | 2.232 |
| 130 | A_55_P2220092 | D230035N22Rik | AAGGATACACAGAGAAATCCTGTCTTGAAAAACT<br>AATAGAAGGGAAAAAATAGCACTCCC  | 2.226 |
| 131 | A_66_P111163  | Gm10896       | ATGTAACCAGGAGGCCTTCAAGGATGCAGA<br>TGTGTCTACAACACAATGACATCGTC      | 2.224 |

|     |               |               |                                                                  |       |
|-----|---------------|---------------|------------------------------------------------------------------|-------|
| 132 | A_55_P2339760 | C230006B20    | GAGTTCTGCCTCAACTTCCCTGAATGAACCTGTA<br>ATTAGAAATAAATCCTTACCTTCCCC | 2.218 |
| 133 | A_52_P496956  | Acsbg1        | TGACATCTCCAATGCCTTACGTGCAAGTAGTTT<br>CAATTCTAACCACTGCTCCTGTTGAG  | 2.218 |
| 134 | A_55_P2021330 | Dynlt1d       | AATAAGGAACAGGAAACCTTTGCTTACAGAGGA<br>GTCCAGACACAAACAGATAGAAGGGGC | 2.213 |
| 135 | A_55_P2019294 |               | AGGACTAGTCCATCAGCAGAACACCCACCCCAAT<br>GAAGCATGCATATATTCATCTTGAAC | 2.207 |
| 136 | A_55_P2076545 | F5            | TGGGCAAAAGTGCTTGCTGCCAAAACAAAACAA<br>CAACAGCAACACAACAAAAACAAACC  | 2.202 |
| 137 | A_55_P2138744 | LOC100045653  | AAATCAGAGCGAAGCCACTGAAGTGCGACTGTG<br>ACCGCCGCTTGAAGACCTACTACACCC | 2.200 |
| 138 | A_51_P449995  | C6            | TTGCTGGACCATCAAGGTATACATGCAAGGAAG<br>ACTCCTGGACACCTCCATTTCAAATT  | 2.194 |
| 139 | A_55_P2119613 | Prss55        | TTGACTGCTTAGAGCCTTGCCAACCTGGAATA<br>AAACAATGCAGTCTCTGATCCACCCT   | 2.193 |
| 140 | A_55_P2020242 | LOC640683     | TACAGTCCCTCTCCAACCTAAGGGTCACAGAACC<br>TGCTTTGGGGACCATGCCATGGCAC  | 2.192 |
| 141 | A_55_P2061879 | Opn4          | ACAGTCTTCTGCAGTCAGAACCTAGAAGATGGA<br>GAACTCAAGGCCTCTCCAGCCCCCA   | 2.191 |
| 142 | A_55_P2122300 | Cir1          | ACAGAAGAGCAAAAATAAACACAAAAAACGTAA<br>AAACAATCCCCTTCTCTTCTCTCTC   | 2.189 |
| 143 | A_52_P564413  | Pik3c2g       | TCTCCCCATCATCATTATCCTACTCAATAGACT<br>CCATACCGAATAGAGAGAAAAGAAG   | 2.187 |
| 144 | A_55_P2042452 | Vgll1         | AGATGTGGGCCCTTCAACATTTAGTCCAGCAAG<br>ATAGATACAAAACCATCCTCTGGAA   | 2.186 |
| 145 | A_55_P1974377 | Defb26        | CCTATCTATTCTGGGCCACTAACACTAAACCATT<br>CACTATGATGCCTAATACTACTTAA  | 2.182 |
| 146 | A_55_P2122075 | Pdcd1lg2      | ATCCTGGCAGCCTCTGAAGTTCTAATTAAGTGA<br>AGCATTTAAGCAACACGTCAAGTGCC  | 2.174 |
| 147 | A_55_P2278845 | 3830408C21Rik | GACCCCAATAAAAAGTCAAAGGACCAAAATGGA<br>TGCAATGAGTATCTTAAACTTGATCA  | 2.174 |
| 148 | A_55_P1954985 | Foxn3         | CCAGTACCTGGCCTTCAAAGGTGACATTTTCAAG<br>CTAAGGTTAAAAACAAAAACAAAA   | 2.170 |
| 149 | A_55_P2049323 | Gm4755        | GACTCTACACTGTGGAACACGCTTCTGGGAATT<br>CAACAGCCTCCTTACACACACCACA   | 2.163 |
| 150 | A_55_P2121716 | Gm9513        | GGGACTGTTATGATTGGAGATAAGACAGTAAAA<br>ATGAACTGTTGCAACAACAAATCTTTC | 2.162 |
| 151 | A_55_P2051879 | 4930473A06Rik | GTGCAGGGATATGTCTACTTAAATAATGAAACAA<br>CCCCTTTTTCTCCCTAAGTTTTAT   | 2.150 |
| 152 | A_55_P1983523 | Cd300ld       | GTTCTAGGTCAGTCTGCTTTACAGAGTGAGTTAT<br>AGGACTACACAGAGAAATCCAAAAAA | 2.149 |
| 153 | A_55_P2285669 | Gm4250        | AACTGTTGAAATAACAGAAAGAGCAGCAGACA<br>GATCGGACCCTGGAATCAAGTTTGGTG  | 2.148 |
| 154 | A_55_P2172001 | Mrgpra2a      | CAACATCTCCTCACTAAGTTTCTACCCCTC<br>CTGAATAAAAAGCATTAAATCAGAAA     | 2.143 |
| 155 | A_55_P2289707 | Cacnb4        | CGACATAGGCTTTGAGGCTGCCGAAACAAACAA<br>ACAAACAAACAAACAAACATCATCTGT | 2.141 |
| 156 | A_55_P2138591 |               | ATAAGCTGCACATAGTAAAAGGACAAGTCCAGG<br>GCTAGCAAGATCCCTTTCAGCTAACA  | 2.140 |
| 157 | A_55_P2111825 | 1700001C02Rik | CCCAGGGAACTTGGCCTGACCAGGCTGGCTTG<br>CTTGAATAAAAATCTTACGCCACAACC  | 2.136 |
| 158 | A_51_P229363  | Rg9mtd3       | AACACTCCTCTTATCCAAAACCTGAGCTCGTAG<br>GTTTTAAGATTGTGGGAATTCTGTT   | 2.132 |
| 159 | A_66_P110425  | Kif6          | GGGGGCGAGTGGAGGTGCAGAAATAGGTGCC<br>AGAAATAATTACAGCTGAATAAAAATAC  | 2.131 |
| 160 | A_55_P2122945 | Olf41         | CTGAGGAACAAGGATGTCAAGCTTGCCTGGGC<br>AGAATCTTACCCTTTCTCACATTAA    | 2.124 |

|     |               |               |                                                                  |       |
|-----|---------------|---------------|------------------------------------------------------------------|-------|
| 161 | A_55_P2102683 | LOC100047543  | GAGAGTCAAAGGTTTTCTTCGAGCACTAGGGAA<br>ACAGCAGTAAAGGTAGAGAAGGAAAAA | 2.123 |
| 162 | A_55_P1996414 | LOC100045477  | ACAGCTGAAATTGCTCCACAACTGAGCTGGTG<br>GAAGTAAAAAGTTCTGGATTACCCCA   | 2.117 |
| 163 | A_52_P327610  |               | GTCACACTCGGCGGGCCGGGAGAACCAGAACCC<br>GCGGCTGGTGCTGCCACCCAGCAGCGC | 2.113 |
| 164 | A_55_P2348126 | 1500032F14Rik | CATCGAGTCCAGGCCAGCCTCAAAAAACAAAC<br>AAAACAAAATAAAATGGCATTCAAATC  | 2.112 |
| 165 | A_55_P1976204 | Cdkn1a        | TGGGGTAGTTTTCCATAGTGACCCGGGTCTTCTT<br>GTGTTTCAGCCACAGGCACCATGTCC | 2.103 |
| 166 | A_55_P2088178 | Cbln2         | GGGGGCTCGGAGAGAAAAACAAAACAAAACAA<br>AACAACAAAATTATGTTTCAGTCCTTGT | 2.099 |
| 167 | A_55_P2428514 | Retn          | ACTCAGTGCGCGAATCCACACACAAGCACACAT<br>ACTTAAAAATAAAACAAAACAGGCTG  | 2.095 |
| 168 | A_55_P2061243 | LOC100048863  | AATGTCTGTTGAAAGAAATTGCCTGCCATTAAC<br>ACATTCATGGGACCTAACACTAC     | 2.095 |
| 169 | A_55_P2117272 |               | TGAGGTCTAATGTGCCAACTTCCCCTTAACATT<br>TTACTTTACCTAAACAACCATTTTC   | 2.089 |
| 170 | A_55_P2158324 | Gm4958        | AGGCACCACAGTGAGCCACACAGATCGCATAGA<br>AGGCACAGCCATCATCGGCACAGCTAA | 2.087 |
| 171 | A_55_P1983828 | Zbtb11        | TATGCGGCAAAGATTTTATGAAAAAGCTTTATT<br>CAGAAGACATGTAAGAAGGCCACCC   | 2.085 |
| 172 | A_55_P2211937 | E130101M22    | AGGTAATCATGTGGTGCATAGATAAATGCAAG<br>CAAATCATCCATACATAAAATCCCT    | 2.081 |
| 173 | A_55_P1952684 | LOC100048289  | TGGAACATGAAAATCAAGAATTGTAATGCA<br>ACAATAAGGGGGAAATGCAATTAATAA    | 2.078 |
| 174 | A_55_P2036460 | D930020E02Rik | AATTTCCAATATAAAAAACTGCCCAAGACTCCC<br>CAGATGAGGACACCATTCTACATAA   | 2.071 |
| 175 | A_55_P2022789 | Zfp646        | AAGGGTTTCTCAAACCTCATGTCCTCAAGAACC<br>ACCGGCGCATCCATGCAGACCCTCGA  | 2.070 |
| 176 | A_51_P519648  | Mical3        | AGAAACAAAAGATATCCACCTGGAATGGAGAA<br>CATGGTGAATCCCCGAACCACTCCCAA  | 2.065 |
| 177 | A_55_P2159573 | Reep6         | AATGTCCAGGCTCTGACAGTTCTTCAGACTCCC<br>AGACAAAGACCACTGCAACCACAG    | 2.063 |
| 178 | A_55_P2269289 | Dgkg          | TTTCTCTGAGGAGGAAAAGCCGTTCAAAGACTA<br>AACAATATGCCAAACACCAGCTCTAC  | 2.058 |
| 179 | A_52_P319726  | LOC100047731  | TTGCCCTAGGAGAAGCCTCACGTGAAGTAGGAA<br>GTACTAATGGAAGGGTGGAGACATGTC | 2.056 |
| 180 | A_55_P2004457 | Prrg1         | CTCATTGCTACTGTAGACTCCCATACTCAAGA<br>ATTTAGCCAAATCAAATCAAATC      | 2.056 |
| 181 | A_55_P2121956 | Gck           | ACATCAGTGATCCGGGAAGAGAAGCAAGCCACC<br>CACAGCATCTCTCCAGGAAACCACCA  | 2.053 |
| 182 | A_55_P2032886 | Pip5k1c       | ATTCCAGCAGTGAATGGGCGGGGAGCGACTG<br>CTCCTCCACATCGGGATCATTGATATT   | 2.049 |
| 183 | A_55_P1999012 | LOC100046875  | GGCTCACAAGTCCACATACATAACTTACATAT<br>ATCTGGATAAAACACTTAGACAGATA   | 2.047 |
| 184 | A_55_P2394495 | 1700023A20Rik | CATACCAGGCATGTCCATCTCTCAGTGCAAAATA<br>GTGCTTCCCAAATAAAGCCAATCTT  | 2.046 |
| 185 | A_55_P2174945 | Gm4615        | TTAAAAGAAGCAGTGCAAGCTCAAAAATACTT<br>CTTTCTCACTCAGGCAGGCACACCCT   | 2.046 |
| 186 | A_55_P2164890 | 5830415F09Rik | TGAAGCTAAGACTGCTTTCACATCGTCAGGGGA<br>AGAATATAATTGAAAACCTCCCAACC  | 2.045 |
| 187 | A_55_P2410325 | 2610028D06Rik | GTAATTATACACACAGGTACACACAGACAGGCA<br>CACATGAATAAAACCAATTTAAAAA   | 2.044 |
| 188 | A_55_P2082376 | Crybb2        | TCATCATCTTCGAACAGGAGAACTCCAGGGCCA<br>TTCCACAGCTCAGCGGGCCCTGCC    | 2.041 |
| 189 | A_55_P2026734 | Rgs4          | GCTTCCGACGAAACACAAAATCTTAATGATGAC<br>AGTAAATAAATGCTTCTCAAAAACA   | 2.041 |

|     |               |              |                                                                  |       |
|-----|---------------|--------------|------------------------------------------------------------------|-------|
| 190 | A_55_P1965584 |              | GCCGCCTCTTTCAGAAACCAAGAGAAAATGGTG<br>GGAGGCGAAAAGAAAACTAAATAAAA  | 2.039 |
| 191 | A_55_P2090909 | Ptx4         | GTCCATATGCCACACCGTGACTGTGTACACACA<br>GTCAAGGCCATCAAGAACAAGCCTCA  | 2.032 |
| 192 | A_55_P2008644 | Gm6268       | CCTACTAGCAAAATTCCTCCTCTAAATTTAACAT<br>GGTTCATTCAAGTCCAAATGAAAC   | 2.028 |
| 193 | A_55_P2323503 | AA960618     | GGTTAGGAAACTAGCACCCAAGCAGCAGAGAGG<br>ACACAAGCTCATTCCCCTTACCCCAT  | 2.027 |
| 194 | A_55_P2144296 | LOC100046658 | CAGGAGAGAAACCTTACAAATGTAATGAGTGTG<br>AGAAATCTTTTACAAAGTCACACAAAC | 2.026 |
| 195 | A_55_P2096370 | Gm3865       | AGCCACAAGTCGCAGAATGTGATCCCGAACCAA<br>ATCCTTCTAAAAATTAGCTTCGGGCAA | 2.020 |
| 196 | A_55_P2176894 | Gm2181       | AAAGAAAGAAAGAAAGAGAGAAAAGTGGAAAT<br>ATCAATCAACCAACCAACAATCAATCA  | 2.016 |
| 197 | A_52_P574759  | Rbpjl        | GAGCAGGAAGGAGAGAGATAGCTCACCTGACCT<br>CAGGCCACTCACTGTCCTCAGACATAC | 2.007 |
| 198 | A_55_P2138966 | Nab2         | AGCTGAATAAGAAGCTGGCGCGGAGCGTGGGG<br>CACATCTTTGAGATGGACGATCATGACG | 2.005 |
| 199 | A_51_P148684  | Pou6f2       | AAAGACTTGCCCCAGTCATCATCTCCCTTGATGT<br>AAAAGACTAAAAACAATAAACTAC   | 2.001 |
| 200 | A_65_P07627   | Dach1        | AGGATCGAAGACAAAAAGCTATCCACTATATGTT<br>AAGAGACTCTTATTAACCTGTTGTAC | 2.000 |

**Table S3. Induction of genes belonging to cellular reprogramming**

| Phases in cellular reprogramming | Fold induction in MEF treated with |       |
|----------------------------------|------------------------------------|-------|
|                                  | $\delta$                           | SAHA  |
| Initiation                       |                                    |       |
| <i>Cdh1</i>                      | 43.3                               | 1.13  |
| <i>Esrp1</i>                     | 2.8                                | 1.07  |
| <i>Cldn7</i>                     | 4.31                               | 0.9   |
| <i>Alpl</i>                      | 25.3                               | -     |
| <i>Gdf3</i>                      | 6.9                                | 0.9   |
| <i>Nanog</i>                     | 42                                 | 1.2   |
| Maturation                       |                                    |       |
| <i>Utf1</i>                      | 3.7                                | 0.9   |
| <i>Zfp42</i>                     | 488                                | -     |
| <i>Esrrb</i>                     | 10.2                               | -     |
| <i>Lin28</i>                     | 5.2                                | 1.13  |
| <i>Prdm1</i>                     | 2.3                                | 1.5   |
| <i>Dppa4</i>                     | 20.2                               | -     |
| Stabilization                    |                                    |       |
| <i>Tcf7</i>                      | 3.7                                | 0.91  |
| <i>Nodal</i>                     | 5.478                              | 1.232 |

Fold induction values in MEFs treated with either  $\delta$  or SAHA over DMSO treated MEFs

**Table S4. Primers for q-RT PCR analysis**

| Gene         | Endogenous primers                                     |
|--------------|--------------------------------------------------------|
| <i>Rex1</i>  | F: CAGTCCTGCACACAGAAGA<br>R: ACTGATCCGCAAACACCTG       |
| <i>Cdh1</i>  | F: CAGGTCTCCTCATGGCTTTGC<br>R: CTTCCGAAAAGAAGGCTGTCC   |
| <i>Snai1</i> | F: AAGATGCACATCCGAAGC<br>R: ATCTCTTCACATCCGAGTGG       |
| <i>Snai2</i> | F: TGATGCCCAGTCTAGGAAAT<br>R: AGTGAGGGCAAGAGAAAGG      |
| <i>Zeb2</i>  | F: TAGCCGGTCCAGAAGAAATG<br>R: GGCCATCTCTTCCTCCAGT      |
| <i>Rex1</i>  | F: AGGAAGTCAGCACCACCGTAGT<br>R: AAGCAGGAAGAGGGCAATGGCT |
| FGF5         | F: ACAAGAGAGGGAAAGCCAAGAG<br>R: GAACAGTGACGGTGAAGGAAAG |

**Table S5. Promoter primers for ChIP analysis**

| Gene           | Primers for ChIP analysis                                     |
|----------------|---------------------------------------------------------------|
| <i>Oct-3/4</i> | F: ATCCGAGCAACTGGTTTGTG<br>R: CAATCCCACCCTCTAGCCTT            |
| <i>Nanog</i>   | F: GGATGTCTTTAGATCAGAGGATGCCC<br>R: CCACAGAAAGAGCAAGACACCAACC |
| <i>Dppa4</i>   | F: GACCAGAAGGGGAGGGGAACGG<br>R: ACCTTCTTGTCTCCAGCAGTCTCC      |
| <i>Cdh1</i>    | F: CATGCTGGGCTACATAGCAA<br>R: TGGGCCTGGAATTGTCTTAG            |
| <i>Rex1</i>    | F: GCATCCTCTGCTTGTGTAATTC<br>R: CTCAGTTATGCAAATGCCTCTTC       |
| <i>Gapdh</i>   | F: ACCAGGGAGGGCTGCAGTCC<br>R: TCAGTTCGGAGCCCACACGC            |



## References

1. Pandian, G. N. *et al.* Synthetic small molecules for epigenetic activation of pluripotent genes in mouse embryonic fibroblasts. *ChemBioChem.* **12**, 2822-2828 (2011).
2. Shinohara, K. *et al.* Antitumor activity of sequence-specific alkylating agents: Pyrolle-imidazole CBI conjugates with indole linker. *Cancer Sci.* **97**, 219-225 (2006).
3. Pandian, G. N. *et al.* Development of programmable small DNA-binding molecules with epigenetic activity for induction of core pluripotency genes. *Bioorg. Med. Chem.* **20**, 2656-2660 (2012).
4. Takahashi, K. & Yamanaka, S. Induction of pluripotent stem cells from mouse embryonic and adult fibroblast cultures by defined factors. *Cell* **126**, 663-676 (2007).
5. O'Neill, L.P., VerMilyea, M.D. & Turner, B.M. Epigenetic characterization of the early embryo with a chromatin immunoprecipitation protocol applicable to small cell populations. *Nat. Genet.* **38**, 835-841 (2006).
